# Supplementary material for: Solvent-free mechanochemical chlorination of pyrazoles with trichloroisocyanuric acid
Source: Royal Society of Chemistry journal article supplement (doi:10.1039/d3gc00170a), 2023-01-01
Supplement: d3gc00170a1.pdf [file d3gc00170a1.pdf]

## Supporting Information

### Solvent-free mechanochemical chlorination of pyrazoles with trichloroisocyanuric acid

*Chi-Min Chen, Jia-Xin Chen and Ching Tat To\**

*Department of Chemistry, Tunghai University, No. 1727, Sec. 4, Taiwan Boulevard, Xitun District, Taichung City 407224, Taiwan, Republic of China*

*Email: [ctto@go.thu.edu.tw](mailto:ctto@go.thu.edu.tw)*

#### Table of Contents

|                                                                                                     |        |
|-----------------------------------------------------------------------------------------------------|--------|
| Experimental section                                                                                | p. S2  |
| Procedure for the chlorination of 3,5-dimethylpyrazole with TCCA in CH <sub>2</sub> Cl <sub>2</sub> | p. S3  |
| General procedure for the mechanochemical chlorination of pyrazoles with TCCA                       | p. S4  |
| Competition experiments                                                                             | p. S7  |
| Substrates with unsatisfactory results                                                              | p. S9  |
| Calculation of green chemistry metrics                                                              | p. S11 |
| X-Ray diffraction data                                                                              | p. S13 |
| NMR spectra                                                                                         | p. S20 |
| HRMS spectra                                                                                        | p. S38 |
| Reference                                                                                           | p. S55 |

## Experimental Section

Unless otherwise specified, all reagents were purchased from commercial suppliers and directly used without further purification. All reactions were carried out in 10 mL zirconia milling vessel designated for the Retsch MM400 shaker mill. All reactions were repeated once to ensure reproducibility. Silica gel (Merck, 70–230 mesh) was used.

$^1\text{H}$ ,  $^{13}\text{C}\{^1\text{H}\}$  and  $^{19}\text{F}\{^1\text{H}\}$  NMR spectra were recorded on a Bruker Ascend TM 400MHz (400 MHz for  $^1\text{H}$ , 100 MHz for  $^{13}\text{C}$  and 376.5 MHz for  $^{19}\text{F}$ ). Chemical shifts (ppm) were referenced internally to the residual solvent proton resonance in  $\text{CDCl}_3$  ( $\delta = 7.26$  ppm) and acetone- $d_6$  ( $\delta = 2.04$  ppm) for  $^1\text{H}$  NMR, and  $\text{CDCl}_3$  ( $\delta = 77.2$  ppm), acetone- $d_6$  ( $\delta = 29.8$  ppm) for  $^{13}\text{C}\{^1\text{H}\}$  NMR, and with reference externally with  $\text{C}_6\text{H}_5\text{CF}_3$  ( $\delta -63.7$  ppm) for  $^{19}\text{F}\{^1\text{H}\}$  NMR. Coupling constants ( $J$ ) are reported in hertz (Hz).

High-resolution mass spectrometry (HRMS) were performed by the Center for Advanced Instrumentation and Department of Applied Chemistry at National Yang Ming Chiao Tung University. Mass spectra of the sample solutions at pH 7.5 were acquired by direct infusion (2  $\mu\text{L}$ ). Electrospray ionization (ESI) experiments were carried out using a Bruker Impact HD Q-TOF mass spectrometer equipped with an ESI source operating in positive ion mode. The parameters of ESI(+) included 4.5kV for ion spray voltage, 200  $^\circ\text{C}$  for capillary temperature, and 6 L/min for sheath gas flow rate. The mass spectra were collected over the mass range of  $m/z$  50-1500 at a resolving power of 40000. The collected data were analysed using Compass DataAnalysis 4.1.

Melting points were determined on a Krüss M3000.

GC-MS analysis was conducted on a Shimadzu QP2010SE system using a Rtx-5MS column (30 m x 0.25 mm). The details of GC program are as follow: the column oven temperature and injection temperature were 100.0 and 230.0  $^\circ\text{C}$ . Helium was used as the carrier gas. Flow control mode was chosen as linear velocity (36.6  $\text{cm s}^{-1}$ ) with pressure of 68.8 kPa. The total flow, column flow and purge flow were 32.5, 0.95 and 3.0  $\text{mL min}^{-1}$ , respectively. Split mode injection with split ratio 30.0 was applied. Sample was injected as solutions in dichloromethane. After injection, the column oven temperature kept at 100.0  $^\circ\text{C}$  for 2 min and then elevated at a rate of 30  $^\circ\text{C min}^{-1}$  until 250.0  $^\circ\text{C}$ . This temperature was kept for 3 min.

X-ray diffraction crystallography was performed on a Bruker D8 Venture diffractometer at National Chung Hsing University.

Compounds **1a-1c**,<sup>1</sup> **1d**,<sup>2</sup> **1e**,<sup>3</sup> **1f-1g**,<sup>4</sup> **1h**,<sup>5</sup> **1i**,<sup>6</sup> **1l**,<sup>7</sup> **1m**,<sup>8</sup> **1n**<sup>9</sup> have been reported.

## Procedure for the Chlorination of 3,5-Dimethylpyrazole with TCCA in CH<sub>2</sub>Cl<sub>2</sub>

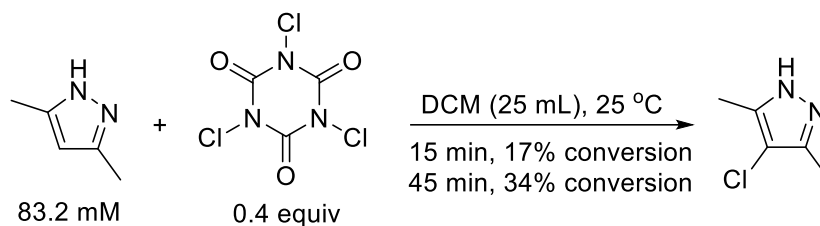

In two separate runs, 3,5-dimethylpyrazole (200.0 mg, 2.08 mmol) and TCCA (193.4 mg, 0.83 mmol) were dissolved in CH<sub>2</sub>Cl<sub>2</sub> (25 mL) in a 50 mL round bottom flask. The reactions were stirred at r.t for 15 min and 45 min, respectively. The aliquots were then rotary evaporated and the residue was immediately analysed with <sup>1</sup>H NMR spectroscopy in CDCl<sub>3</sub>. The conversions were calculated from the ratio of methyl signals between the starting material and product.

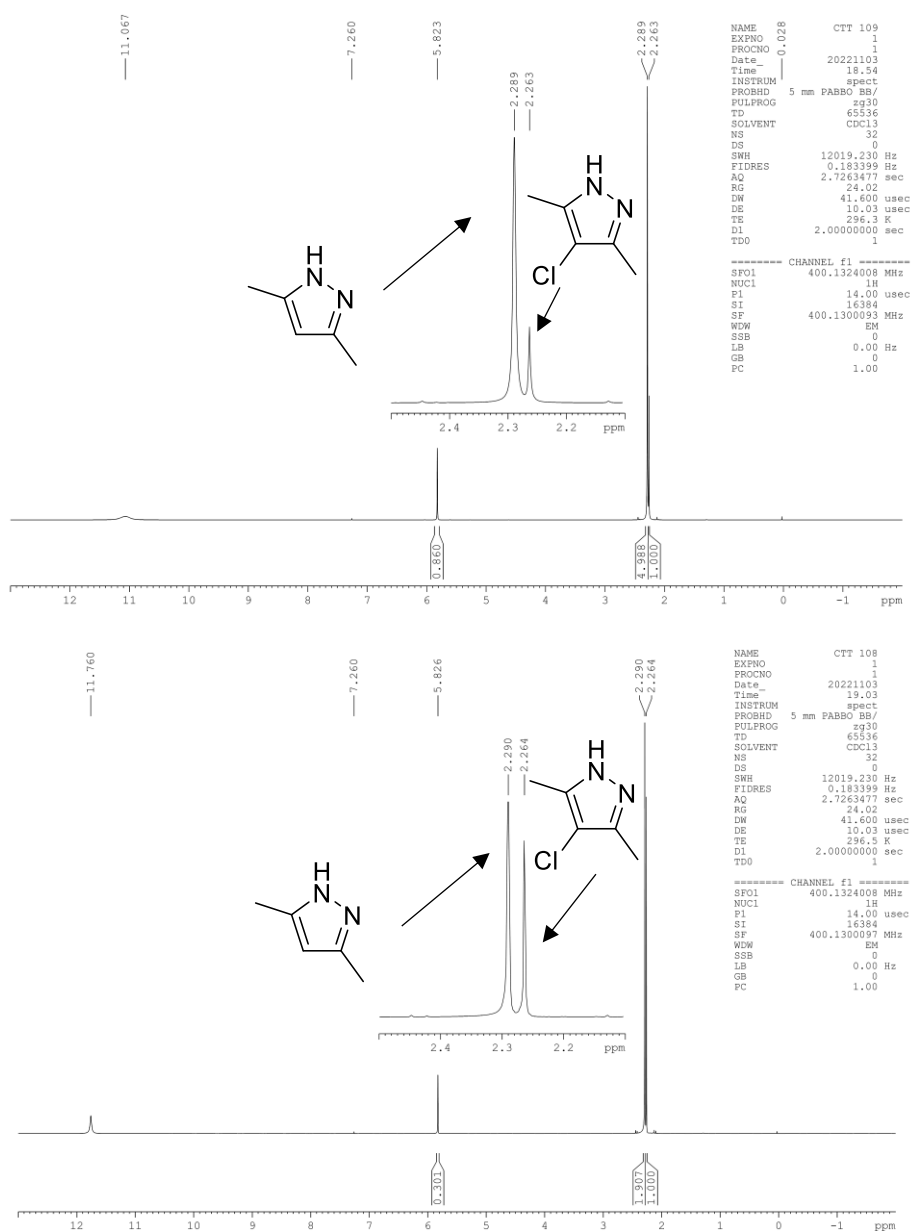

Figure S1. <sup>1</sup>H NMR spectrum for 15 min (up) and 45 min (down) reaction time.

## General Procedure for the Mechanochemical Chlorination of Pyrazoles with TCCA

In a typical run, pyrazole (2.08 mmol), TCCA (0.83 mmol), silica gel (200.0 mg) and two ZrO<sub>2</sub> milling balls (5.0 mm diameter) were charged into a 10 mL ZrO<sub>2</sub> milling cell. This reaction vessel was then mounted on the shaker mill and oscillated at 30.0 Hz for designated reaction time. The progress of reaction was monitored by temporarily pausing the shaking and analyzed either by TLC or GC-MS until complete consumption of pyrazole. The resultant mixture was extracted with CH<sub>2</sub>Cl<sub>2</sub> or MeOH and filtered through a short pad of silica on a frit (2 cm X 1 cm) to remove insoluble solid, followed by washing with 2% NaS<sub>2</sub>O<sub>3</sub> solution to quench any remaining active chlorine content. Rotary evaporation of the solvent yielded the corresponding 4-chloropyrazole product.

4-Chloro-3,5-dimethylpyrazole **1a** [CAS 15953-73-8]. <sup>1</sup>H NMR (CDCl<sub>3</sub>, 400 MHz) 2.24 (s, 6 H), 11.25 (br s, 1 H). <sup>13</sup>C{<sup>1</sup>H} NMR (CDCl<sub>3</sub>, 100 MHz) 10.5, 107.9, 141.1. HRMS calcd. for [C<sub>5</sub>H<sub>7</sub>ClN<sub>2</sub>+H]<sup>+</sup>: m/z 131.0371. Found: m/z 131.0371. m.p. Lit. 117-118 °C. m.p. found 114.7-115.9 °C.

4-Chloropyrazole **1b** [CAS 15878-00-9]. <sup>1</sup>H NMR (CDCl<sub>3</sub>, 400 MHz) 7.57 (s, 2 H), 9.14 (br s, 1 H). <sup>13</sup>C{<sup>1</sup>H} NMR (CDCl<sub>3</sub>, 100 MHz) 110.6, 132.1. HRMS calcd. for [C<sub>3</sub>H<sub>3</sub>ClN<sub>2</sub>+H]<sup>+</sup>: m/z 103.0058. Found: m/z 103.0058. M.p. Lit. 75-79 °C. M.p. found 76.7-78.1 °C.

4-Chloro-3,5-diphenylpyrazole **1c** [CAS 71549-28-5]. <sup>1</sup>H NMR (CDCl<sub>3</sub>, 400 MHz) 7.40-7.49 (m, 6 H), 7.81 (d, *J* = 7.2 Hz, 4 H), 10.78 (s, 1 H). HRMS calcd. for [C<sub>15</sub>H<sub>11</sub>ClN<sub>2</sub>+H]<sup>+</sup>: m/z 255.0684. Found: m/z 255.0684. mp. Lit. 191-193 °C. M.p. found 204.8-205.7 °C.

4-Chloro-3,5-dimethyl-1H-pyrazole-1-carboxamide **1d** [CAS 1174305-03-3]. <sup>1</sup>H NMR (CDCl<sub>3</sub>, 400 MHz) 2.22 (s, 3 H), 2.55 (s, 3 H), 5.27 (br s, 1 H), 7.08 (s, 1 H). <sup>13</sup>C{<sup>1</sup>H} NMR (CDCl<sub>3</sub>, 100 MHz) 11.7, 12.1, 113.2, 139.4, 148.2, 151.8. HRMS calcd. for [C<sub>6</sub>H<sub>8</sub>ClN<sub>3</sub>O+H]<sup>+</sup>: m/z 174.0429. Found: m/z 174.0424. M.p. lit. 141-142 °C. M.p. found 134.4-135.8 °C.

4-Chloro-1-(tetrahydro-2H-pyran-2-yl)-1H-pyrazole **1e** [CAS 1881288-80-7]. <sup>1</sup>H NMR (CDCl<sub>3</sub>, 400 MHz) 1.51-1.57 (m, 3 H), 1.94 (broad s, 3 H), 3.58 (t, *J* = 10.5 Hz, 1 H), 3.93 (d, *J* = 11.5 Hz, 1 H), 5.22-5.23 (m, 1 H), 7.38 (s, 1 H), 7.53 (s, 1 H). <sup>13</sup>C{<sup>1</sup>H} NMR (CDCl<sub>3</sub>, 100 MHz) 22.1, 24.8, 30.2, 67.6, 87.9, 110.6, 125.7, 137.9. HRMS calcd. for [C<sub>8</sub>H<sub>11</sub>ClN<sub>2</sub>O+H]<sup>+</sup>: m/z 187.0633. Found: m/z 187.0627. (Green Chem. 2016, 18, 6209-6214). Pale yellow oil.

4-Chloro-3,5-dimethyl-1-phenyl-1H-pyrazole **1f** [CAS 861382-34-5]. Purified on silica gel column chromatography with hexane/DCM = 3:1 as the eluent. <sup>1</sup>H NMR (CDCl<sub>3</sub>, 400 MHz) 2.27 (s, 3 H), 2.29 (s, 3 H), 7.32-7.45 (m, 5 H). HRMS calcd. for [C<sub>11</sub>H<sub>11</sub>ClN<sub>2</sub>+H]<sup>+</sup>: m/z 207.0684. Found: m/z 207.0686. pale yellow oil.

Di-chlorinated side product of 3,5-dimethyl-1-phenylpyrazole **1f-2**. Purified on silica gel column chromatography with hexane/DCM = 3:1 as the eluent.  $^1\text{H}$  NMR ( $\text{CDCl}_3$ , 400 MHz) 2.32 (s, 3 H), 4.56 (s, 2 H), 7.42-7.57 (m, 5 H). HRMS calcd. for  $[\text{C}_{11}\text{H}_{10}\text{Cl}_2\text{N}_2+\text{H}]^+$ : m/z 241.0294. Found: m/z 241.0293.

Tri-chlorinated side product of 3,5-dimethyl-1-phenylpyrazole **1f-3**. Purified on silica gel column chromatography with hexane/DCM = 3:1 as the eluent.  $^1\text{H}$  NMR ( $\text{CDCl}_3$ , 400 MHz) 2.32 (s, 3 H), 6.70 (s, 1 H), 7.45-7.55 (m, 5 H). HRMS calcd. for  $[\text{C}_{11}\text{H}_9\text{Cl}_3\text{N}_2+\text{H}]^+$ : m/z 274.9904. Found: m/z 274.9902.

4-Chloro-1-phenylpyrazole **1g** [CAS 6831-92-1].  $^1\text{H}$  NMR ( $\text{CDCl}_3$ , 400 MHz) 7.31 (t,  $J = 7.6$  Hz, 1 H), 7.45 (t,  $J = 7.8$  Hz, 2 H), 7.63 (d,  $J = 7.6$  Hz, 2 H), 7.65 (s, 1 H), 7.90 (s, 1 H).  $^{13}\text{C}\{^1\text{H}\}$  NMR ( $\text{CDCl}_3$ , 100 MHz) 112.5, 119.1, 125.0, 127.1, 129.7, 139.6, 139.8. HRMS calcd. for  $[\text{C}_9\text{H}_7\text{ClN}_2+\text{H}]^+$ : m/z 179.0371. Found: m/z 179.0371. M.p. Lit. 72.5-74.3 °C. M.p. found 73.5-74.2 °C.

4-Chloro-1-(4-methoxyphenyl)-1H-pyrazole **1h** [CAS 1402566-05-5].  $^1\text{H}$  NMR ( $\text{CDCl}_3$ , 400 MHz) 3.83 (s, 3 H), 6.96 (d,  $J = 9.2$  Hz, 2 H), 7.52 (d,  $J = 8.8$  Hz, 2 H), 7.60 (s, 1 H), 7.80 (s, 1 H).  $^{13}\text{C}\{^1\text{H}\}$  NMR ( $\text{CDCl}_3$ , 100 MHz) 55.7, 112.0, 114.7, 120.9, 125.1, 133.6, 139.1, 158.7. HRMS calcd. for  $[\text{C}_{10}\text{H}_9\text{ClN}_2\text{O}+\text{H}]^+$ : m/z 209.0476. Found: m/z 209.0476. M.p. found 94.5-95.2 °C.

1-(4-Bromophenyl)-4-chloro-1H-pyrazole **1i** [CAS 1248589-16-3].  $^1\text{H}$  NMR ( $\text{CDCl}_3$ , 400 MHz) 7.52 (d,  $J = 9.1$  Hz, 2 H), 7.58 (d,  $J = 8.8$  Hz, 2 H), 7.64 (s, 1 H), 7.88 (s, 1 H).  $^1\text{H}$  NMR (acetone- $d_6$ , 400 MHz) 7.69 (d,  $J = 8.7$  Hz, 2 H), 7.75 (s, 1 H), 7.80 (d,  $J = 8.7$  Hz, 2 H), 8.52 (s, 1 H).  $^{13}\text{C}\{^1\text{H}\}$  NMR ( $\text{CDCl}_3$ , 100 MHz) 112.9, 120.4, 124.8, 132.6, 138.7, 139.9 [one peak is overlapped].  $^{13}\text{C}\{^1\text{H}\}$  NMR (acetone- $d_6$ , 100 MHz) 113.1, 120.3, 121.2, 126.5, 133.4, 139.9, 140.3. HRMS calcd. for  $[\text{C}_9\text{H}_6\text{BrClN}_2+\text{H}]^+$ : m/z 256.9476. Found: m/z 256.9473. M.p. found 74.2-75.0 °C.

4-(4-chloro-1H-pyrazol-1-yl)benzaldehyde **1j** [CAS 1179758-89-4].  $^1\text{H}$  NMR ( $\text{CDCl}_3$ , 400 MHz) 7.70 (s, 1 H), 7.83 (d,  $J = 8.6$  Hz, 2 H), 7.99 (d,  $J = 8.7$  Hz, 2 H), 8.01 (s, 1 H), 10.02 (s, 1 H).  $^{13}\text{C}\{^1\text{H}\}$  NMR ( $\text{CDCl}_3$ , 100 MHz) 113.9, 118.7, 125.0, 131.5, 134.6, 140.9, 143.8, 190.9. HRMS calcd. for  $[\text{C}_{10}\text{H}_7\text{ClN}_2\text{O}+\text{H}]^+$ : m/z 207.0320. Found: m/z 207.0316. M.p. found 122.8-123.3 °C.

4-(4-chloro-1H-pyrazol-1-yl)benzotrile **1k** [CAS 1179745-44-8].  $^1\text{H}$  NMR ( $\text{CDCl}_3$ , 400 MHz) 7.69 (s, 1 H), 7.75 (d,  $J = 9.0$  Hz, 2 H), 7.79 (d,  $J = 9.0$  Hz, 2 H), 7.98 (s, 1 H).  $^{13}\text{C}\{^1\text{H}\}$  NMR ( $\text{CDCl}_3$ , 100 MHz) 110.4, 114.2, 118.3, 118.9, 124.9, 133.9, 141.0, 142.5. HRMS calcd. for  $[\text{C}_{10}\text{H}_6\text{ClN}_3+\text{H}]^+$ : m/z 204.0323. Found: m/z 204.0319. M.p. found 134.5-134.9 °C.

4-Chloro-1-(4-nitrophenyl)-1H-pyrazole **1l** [CAS 65041-53-4].  $^1\text{H}$  NMR ( $\text{CDCl}_3$ , 400 MHz) 7.72 (s, 1 H), 7.83 (d,  $J = 9.0$  Hz, 2 H), 8.02 (s, 1 H), 8.35 (d,  $J = 9.0$  Hz, 2 H).  $^{13}\text{C}\{^1\text{H}\}$  NMR ( $\text{CDCl}_3$ , 100

MHz) 114.5, 118.6, 125.1, 125.6, 141.4, 143.9, 145.9. HRMS calcd. for  $[\text{C}_9\text{H}_6\text{ClN}_3\text{O}_2+\text{H}]^+$ :  $m/z$  224.0221. Found:  $m/z$  224.0220. M.p. Lit. 145.5-146.5 °C. M.p. found 144.7-146.3 °C.

2-(4-chloro-1H-pyrazol-1-yl)pyridine **1m** [CAS 77556-33-3].  $^1\text{H}$  NMR ( $\text{CDCl}_3$ , 400 MHz) 7.18-7.21 (m, 1 H), 7.64 (s, 1 H), 7.81 (td,  $J = 7.8$  Hz, 2.1 Hz, 1 H), 7.93 (d,  $J = 8.0$  Hz, 1 H), 8.39 (d,  $J = 3.2$  Hz, 1 H), 8.54 (s, 1 H).  $^{13}\text{C}\{^1\text{H}\}$  NMR ( $\text{CDCl}_3$ , 100 MHz) 112.0, 113.0, 121.9, 125.1, 138.9, 140.5, 148.2, 151.1. HRMS calcd. for  $[\text{C}_8\text{H}_6\text{ClN}_3+\text{H}]^+$ :  $m/z$  180.0323. Found:  $m/z$  180.0321. mp. Lit. 64-65 °C. M.p. found 69.6-70.3 °C.

4-chloro-celecoxib **1n** [2248154-36-9].  $^1\text{H}$  NMR ( $\text{CDCl}_3$ , 400 MHz) 2.41 (s, 3 H), 4.89 (br s, 2 H), 7.16 (d,  $J = 8.0$  Hz, 2 H), 7.24 (d,  $J = 8.0$  Hz, 2 H), 7.41 (d,  $J = 8.6$  Hz, 2 H), 7.88 (d,  $J = 8.5$  Hz, 2 H).  $^{13}\text{C}\{^1\text{H}\}$  NMR ( $\text{CDCl}_3$ , 100 MHz) 21.6, 109.9, 120.5 (quartet,  $^1J_{\text{CF}} = 268.5$  Hz), 123.4, 125.2, 127.7, 129.8, 130.1, 140.7, 140.8 (quartet,  $^2J_{\text{CF}} = 37.5$  Hz), 141.6, 142.0, 142.4.  $^{19}\text{F}\{^1\text{H}\}$  NMR ( $\text{CDCl}_3$ , 376 MHz) -63.7 (s). HRMS calcd. for  $[\text{C}_{17}\text{H}_{13}\text{ClF}_3\text{N}_3\text{O}_2\text{S}+\text{H}]^+$ :  $m/z$  416.0442. Found:  $m/z$  416.0440. M.p. Lit. 169-171 °C. M.p. found 174.5-175.8 °C. Single crystal suitable for X-ray diffraction was obtained by slow evaporation of  $\text{CH}_2\text{Cl}_2/\text{MeOH}$  solution.

#### *Gram-Scale Mechanochemical Chlorination of Pyrazoles with TCCA*

*With 3,5-dimethylpyrazole.* 3,5-dimethylpyrazole **1** (1.00 g, 10.4 mmol), TCCA (967.0 mg, 4.16 mmol), silica gel (200.0 mg) and one  $\text{ZrO}_2$  milling ball (10.0 mm diameter) were charged into a  $\text{ZrO}_2$  shaker cell. This reaction vessel was then mounted on the shaker mill and oscillated at 30.0 Hz for 60 min. The resultant mixture was extracted with  $\text{CH}_2\text{Cl}_2$  and filtered through a short pad of silica on a frit to remove insoluble solid, followed by washing with 5%  $\text{NaS}_2\text{O}_3$  solution to quench any remaining active chlorine content. Rotary evaporation of the solvent yielded 4-chloro-3,5-dimethylpyrazole **1a** (1.11 g, 8.50 mmol, 82%).

*With 1-phenylpyrazole.* 1-phenylpyrazole **1** (917  $\mu\text{L}$ , 6.36 mmol), TCCA (591.0 mg, 2.54 mmol), silica gel (200.0 mg) and one  $\text{ZrO}_2$  milling ball (10.0 mm diameter) were charged into a  $\text{ZrO}_2$  shaker cell. This reaction vessel was then mounted on the shaker mill and oscillated at 30.0 Hz for 45 min. The resultant mixture was extracted with  $\text{CH}_2\text{Cl}_2$  and filtered through a short pad of silica on a frit to remove insoluble solid, followed by washing with 5%  $\text{NaS}_2\text{O}_3$  solution to quench any remaining active chlorine content. Rotary evaporation of the solvent yielded 4-chloro-1-phenylpyrazole **1g** (1.06 g, 5.93 mmol, 93%).

## Competition Experiments between 1-Phenylpyrazole and 1-Arylpyrazoles

1-phenylpyrazole (2.0 mmol), 1-arylpyrazole (2.0 mmol), TCCA (0.066 mmol), silica gel (200.0 mg) and two ZrO<sub>2</sub> milling balls (5.0 mm diameter) were charged into a 10 mL ZrO<sub>2</sub> milling cell. This reaction vessel was then mounted on the shaker mill and oscillated at 30.0 Hz for designated reaction time. The resultant mixture was extracted with CH<sub>2</sub>Cl<sub>2</sub> and filtered through a short pad of silica on a frit to remove insoluble solid, followed by washing with 5% NaS<sub>2</sub>O<sub>3</sub> solution to quench any remaining active chlorine content. The ratio between 4-chloro-1-phenylpyrazole **1a** and 4-chloro-1-arylpyrazole was determined by analyzing the mixture with GC-MS.

Table S1. Competition Experiments

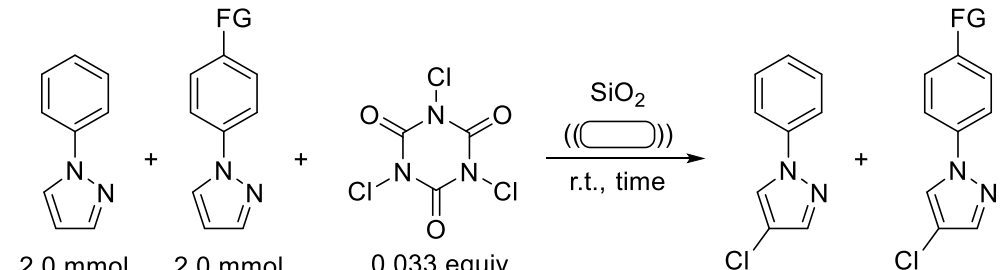

| entry | FG              | time / min | yield / % |    |             | log( $k_{FG}/k_H$ ) <sup>a</sup> |
|-------|-----------------|------------|-----------|----|-------------|----------------------------------|
|       |                 |            | FG        | H  | total yield |                                  |
| 1     | OMe             | 30         | 62        | 20 | 82          | 0.49                             |
| 2     | OMe             | 45         | 64        | 23 | 89          | 0.44                             |
| 3     | Br              | 45         | 9         | 70 | 79          | -0.89                            |
| 4     | Br              | 45         | 8         | 73 | 81          | -0.96                            |
| 5     | CHO             | 30         | 4         | 86 | 91          | -1.33                            |
| 6     | CHO             | 45         | 3         | 95 | 98          | -1.50                            |
| 7     | CN              | 30         | 2         | 91 | 93          | -1.66                            |
| 8     | CN              | 30         | 2         | 84 | 86          | -1.62                            |
| 9     | NO <sub>2</sub> | 30         | 1         | 91 | 91          | -3.26                            |
| 10    | NO <sub>2</sub> | 45         | 1         | 85 | 85          | -3.23                            |

Table S2. Hammett Plot of Mechanochemical Chlorination of 1-Arylpyrazoles with TCCA using the Hammett Constant  $\sigma_p$ .

| entry | FG              | $\sigma_p^a$ | $\log(k_{FG}/k_H)$ |
|-------|-----------------|--------------|--------------------|
| 1     | OMe             | -0.27        | 0.49               |
| 2     | OMe             | -0.27        | 0.44               |
| 3     | Br              | 0.23         | -0.89              |
| 4     | Br              | 0.23         | -0.96              |
| 5     | CHO             | 0.42         | -1.33              |
| 6     | CHO             | 0.42         | -1.50              |
| 7     | CN              | 0.66         | -1.66              |
| 8     | CN              | 0.66         | -1.62              |
| 9     | NO <sub>2</sub> | 0.78         | -3.26              |
| 10    | NO <sub>2</sub> | 0.78         | -3.23              |

<sup>a</sup> Reference 10.

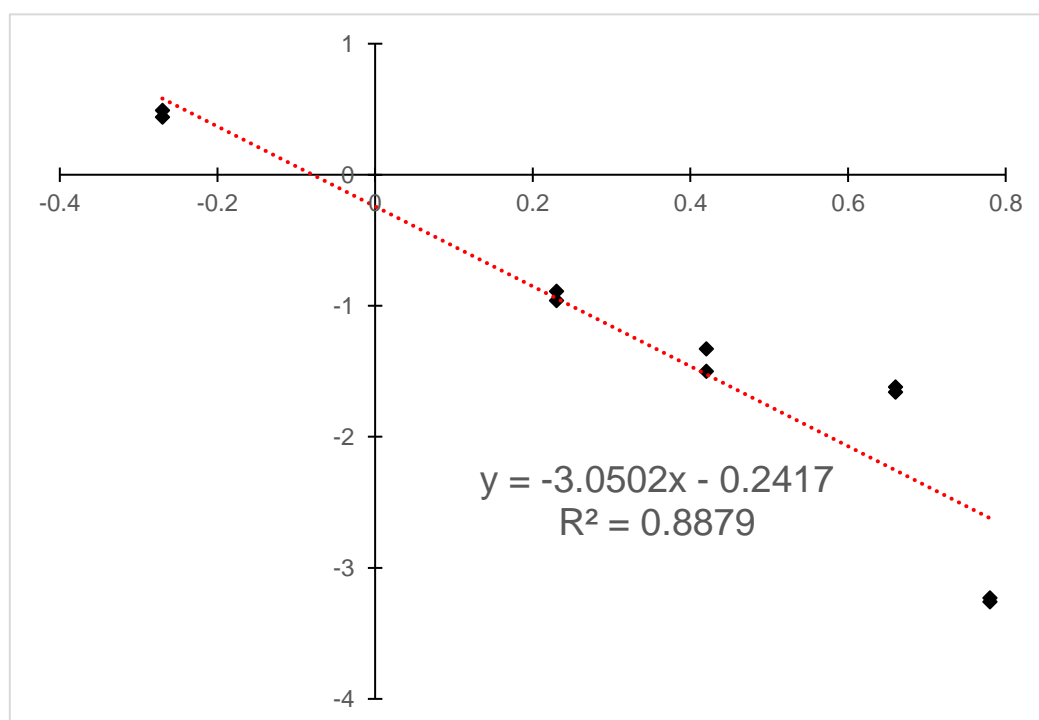

Figure S2. Hammett Plot of Mechanochemical Chlorination of 1-Arylpyrazoles with TCCA using the Hammett Constant  $\sigma_p$ .



## Substrates with Unsatisfactory Results<sup>a,b</sup>

| entry          | substrate                                                                           | remark                                                                     |
|----------------|-------------------------------------------------------------------------------------|----------------------------------------------------------------------------|
| 1 <sup>c</sup> | 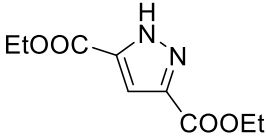   | expected chlorination product observed but less than 50% conversion in 3 h |
| 2 <sup>c</sup> |    | expected chlorination product observed but less than 50% conversion in 3 h |
| 3              |    | complicated mixture                                                        |
| 4              |   | complicated mixture                                                        |
| 5              |  | complicated mixture                                                        |
| 6              |  | complicated mixture                                                        |
| 7              |  | complicated mixture                                                        |

|                 |                                                                                     |                                                                                                                                    |
|-----------------|-------------------------------------------------------------------------------------|------------------------------------------------------------------------------------------------------------------------------------|
| 8               | 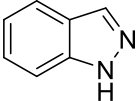   | two mono-chlorination products                                                                                                     |
| 9 <sup>c</sup>  |    | mixture of mono, di, tri, tetra-chlorination products and poly-pyrrolic substances                                                 |
| 10 <sup>c</sup> |    | two mono-chlorination products<br>three di-chlorination products<br>one tri-chlorination product<br>one tetra-chlorination product |
| 11 <sup>c</sup> |    | one mono-chlorination product<br>one di-chlorination product                                                                       |
| 12 <sup>c</sup> |   | one mono-chlorination product<br>one di-chlorination product<br>some chlorinated indolione products                                |
| 13              |  | unknowns                                                                                                                           |
| 14 <sup>c</sup> |  | two mono-chlorination products<br>one di-chlorination product<br>one tri-chlorination product                                      |
| 15 <sup>c</sup> |  | three products                                                                                                                     |

<sup>a</sup> Standard conditions as indicated in the manuscript

<sup>b</sup> Reaction was analyzed after 30 min with TLC, GC-MS or <sup>1</sup>H NMR; Regioselectivity not determined

<sup>c</sup> Starting material was remained

## Calculation of Green Chemistry Metrics

For mechanochemical chlorination of 3,5-dimethylpyrazole with TCCA

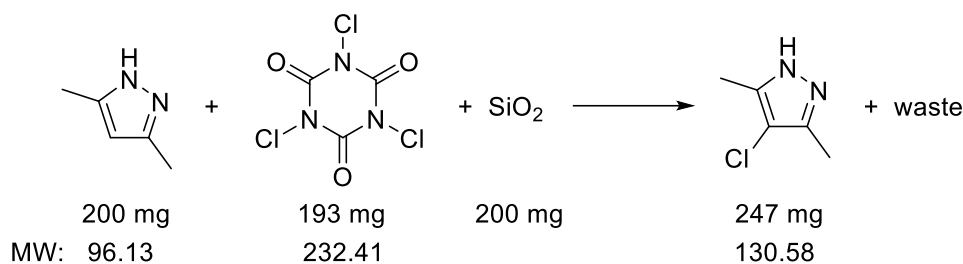

Atom Economy (AE) =  $130.58 / (96.13 + 232.41/3) \times 100\% = 75.2\%$

Reaction Mass Efficiency (RME) =  $247 / (200 + 193) \times 100\% = 62.8\%$

Process Mass Intensity (PMI) =  $(200 + 193 + 200) / 247 = 2.40$

E-factor =  $PMI - 1 = 2.40 - 1 = 1.40$

For mechanochemical chlorination of 3,5-diphenylpyrazole with TCCA

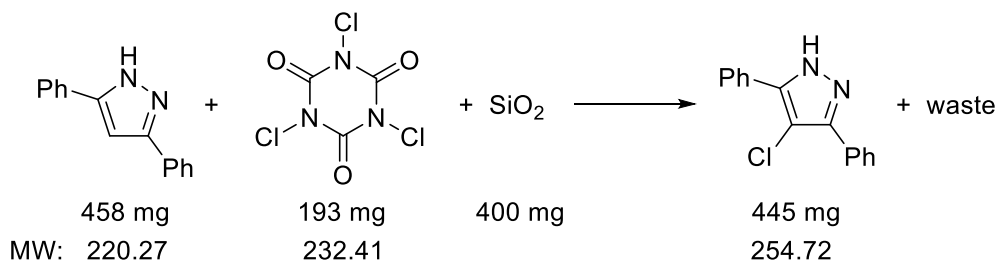

Atom Economy (AE) =  $254.72 / (220.27 + 232.41/3) \times 100\% = 85.6\%$

Reaction Mass Efficiency (RME) =  $445 / (458 + 193) \times 100\% = 68.4\%$

Process Mass Intensity (PMI) =  $(458 + 193 + 400) / 445 = 2.36$

E-factor =  $PMI - 1 = 2.36 - 1 = 1.36$

For mechanochemical chlorination of 1-phenylpyrazole with TCCA

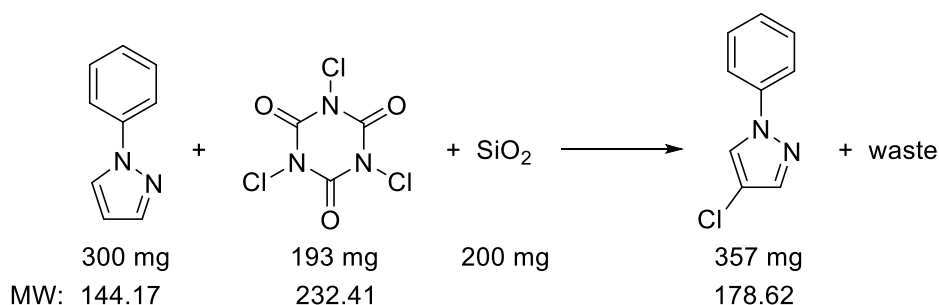

Atom Economy (AE) =  $178.62 / (144.17 + 232.41/3) \times 100\% = 80.6\%$

Reaction Mass Efficiency (RME) =  $357 / (300 + 193) \times 100\% = 72.4\%$

Process Mass Intensity (PMI) =  $(300 + 193 + 200) / 357 = 1.94$

E-factor =  $PMI - 1 = 1.94 - 1 = 0.94$

The green chemistry metrics for the synthesis of 4-chloro-1-phenylpyrazole **1g** using other protocols were calculated according to the published literatures. The results were tabulated below together with this report.

Table S3. Comparison of Green Chemistry Metrics for the Chlorination of 1-phenylpyrazole of various Chlorinating System

| Green Chemistry Metrics | this work<br>TCCA                 | 1-Chloro-1,2-benziodoxol-3-one <sup>11</sup> | CBMG <sup>12</sup> | CFBSA <sup>13</sup> | TCCA <sup>14</sup> | NaCl/Oxone <sup>15</sup> |
|-------------------------|-----------------------------------|----------------------------------------------|--------------------|---------------------|--------------------|--------------------------|
| AE                      | 80.6%                             | 41.9%                                        | 50.5%              | 50.5%               | 80.6%              | 35.0%                    |
| RME                     | 72.4%                             | 36.7%                                        | 45.4%              | 37.5%               | 44.1%              | 10.7%                    |
| <i>E</i> -factor        | 0.94                              | 55.7                                         | 47.8               | 65.3                | 37.1               | 13.3                     |
| PMI                     | 1.94                              | 56.7                                         | 48.8               | 66.3                | 38.1               | 14.3                     |
| Purification:           | filtration /<br>recrystallization | column chromatography                        |                    |                     |                    |                          |

## X-Ray Diffraction Data

Table S4. Crystal data and structural refinement for **1n**.

|                                   |                                                                                                                    |
|-----------------------------------|--------------------------------------------------------------------------------------------------------------------|
| Compound                          | 4-chloro-celecoxib <b>1n</b>                                                                                       |
| Empirical formula                 | C <sub>17</sub> H <sub>13</sub> ClF <sub>3</sub> N <sub>3</sub> O <sub>2</sub> S                                   |
| Formula weight                    | 415.81                                                                                                             |
| Temperature                       | 150(2) K                                                                                                           |
| Wavelength                        | 0.71073 Å                                                                                                          |
| Crystal system                    | triclinic                                                                                                          |
| Space group                       | P-1                                                                                                                |
| Unit cell dimensions              | a = 8.0656(3) Å    α = 85.0509(15)°<br>b = 8.5494(3) Å    β = 86.9189(14)°<br>c = 13.9078(6) Å    γ = 79.3578(14)° |
| Volume                            | 938.32(6) Å <sup>3</sup>                                                                                           |
| Z                                 | 2                                                                                                                  |
| Density (calculated)              | 1.472 mg/cm <sup>3</sup>                                                                                           |
| Absorption coefficient            | 0.361 mm <sup>-1</sup>                                                                                             |
| F(000)                            | 424                                                                                                                |
| Crystal size                      | 0.380 x 0.260 x 0.220 mm <sup>3</sup>                                                                              |
| Theta range for data collection   | 2.913 to 27.952°                                                                                                   |
| Limiting indices                  | -10 ≤ h ≤ 10, -11 ≤ k ≤ 11, -18 ≤ l ≤ 18                                                                           |
| Reflections collected             | 18454                                                                                                              |
| Independent reflections           | 4468 [R(int) = 0.0365]                                                                                             |
| Completeness to theta = 25.242°   | 99.2%                                                                                                              |
| Absorption correction             | Semi-empirical from equivalents                                                                                    |
| Max. and min. transmission        | 0.7456 and 0.6957                                                                                                  |
| Refinement method                 | Full-matrix least-squares on F <sup>2</sup>                                                                        |
| Data / restraints / parameters    | 4468 / 0 / 252                                                                                                     |
| Goodness-of fit on F <sup>2</sup> | 1.070                                                                                                              |
| Final R indices [I > 2σ(I)]       | R1 = 0.0394, wR2 = 0.1192                                                                                          |
| R indices (all data)              | R1 = 0.0445, wR2 = 0.1242                                                                                          |
| Extinction coefficient            | n/a                                                                                                                |
| Largest diff. peak and hole       | 0.367 and -0.528 e.Å <sup>-3</sup>                                                                                 |

Table S5. Atomic coordinates ( $\times 10^4$ ) and equivalent isotropic displacement parameters ( $\text{\AA}^2 \times 10^3$ ) for 4-chlorocelecoxib.  $U(\text{eq})$  is defined as one third of the trace of the orthogonalized  $U^{ij}$  tensor.

|       | x        | y        | z       | U(eq) |
|-------|----------|----------|---------|-------|
| Cl    | 6202(1)  | 1128(1)  | 710(1)  | 32(1) |
| S     | 2686(1)  | 8964(1)  | 5370(1) | 16(1) |
| F(1)  | 1448(2)  | 210(2)   | 2608(1) | 37(1) |
| F(2)  | 3769(2)  | -1110(2) | 2059(1) | 50(1) |
| F(3)  | 2113(2)  | 444(2)   | 1102(1) | 42(1) |
| O(1)  | 1144(2)  | 8800(2)  | 5900(1) | 22(1) |
| O(2)  | 4192(2)  | 8905(2)  | 5889(1) | 22(1) |
| N(1)  | 3013(2)  | 2665(2)  | 2786(1) | 18(1) |
| N(2)  | 4066(2)  | 3740(2)  | 2700(1) | 18(1) |
| N(3)  | 2350(2)  | 10661(2) | 4744(1) | 19(1) |
| C(1)  | 5318(2)  | 3414(2)  | 2002(1) | 19(1) |
| C(2)  | 5041(2)  | 2051(2)  | 1631(1) | 21(1) |
| C(3)  | 3613(2)  | 1639(2)  | 2134(1) | 19(1) |
| C(4)  | 3768(2)  | 5007(2)  | 3332(1) | 18(1) |
| C(5)  | 2113(2)  | 5542(2)  | 3662(2) | 26(1) |
| C(6)  | 1787(2)  | 6751(3)  | 4287(2) | 26(1) |
| C(7)  | 3107(2)  | 7417(2)  | 4575(1) | 17(1) |
| C(8)  | 4755(2)  | 6882(2)  | 4243(1) | 20(1) |
| C(9)  | 5087(2)  | 5658(2)  | 3626(1) | 21(1) |
| C(10) | 6622(2)  | 4370(2)  | 1691(1) | 18(1) |
| C(11) | 6200(3)  | 5820(2)  | 1150(2) | 27(1) |
| C(12) | 7439(3)  | 6702(2)  | 843(2)  | 32(1) |
| C(13) | 9114(3)  | 6154(3)  | 1062(2) | 28(1) |
| C(14) | 9527(3)  | 4688(3)  | 1585(2) | 29(1) |
| C(15) | 8298(3)  | 3796(2)  | 1903(2) | 26(1) |
| C(16) | 10461(3) | 7120(3)  | 742(2)  | 44(1) |
| C(17) | 2731(3)  | 293(2)   | 1985(1) | 23(1) |

Table S6. Bond lengths [ $\text{\AA}$ ] and angles [ $^\circ$ ] for JXC041.

| Bond       | Bond Length / $\text{\AA}$ | Bond         | Bond Length / $\text{\AA}$ |
|------------|----------------------------|--------------|----------------------------|
| Cl-C(2)    | 1.7069(18)                 | C(8)-C(9)    | 1.389(2)                   |
| S-O(1)     | 1.4346(13)                 | C(8)-H(8A)   | 0.9500                     |
| S-O(2)     | 1.4372(13)                 | C(9)-H(9A)   | 0.9500                     |
| S-N(3)     | 1.6117(16)                 | C(10)-C(11)  | 1.389(3)                   |
| S-C(7)     | 1.7704(18)                 | C(10)-C(15)  | 1.388(3)                   |
| F(1)-C(17) | 1.322(2)                   | C(11)-C(12)  | 1.389(3)                   |
| F(2)-C(17) | 1.330(2)                   | C(11)-H(11A) | 0.9500                     |
| F(3)-C(17) | 1.337(2)                   | C(12)-C(13)  | 1.387(3)                   |
| N(1)-C(3)  | 1.327(2)                   | C(12)-H(12A) | 0.9500                     |
| N(1)-N(2)  | 1.356(2)                   | C(13)-C(14)  | 1.388(3)                   |
| N(2)-C(1)  | 1.370(2)                   | C(13)-C(16)  | 1.509(3)                   |
| N(2)-C(4)  | 1.431(2)                   | C(14)-C(15)  | 1.390(3)                   |
| N(3)-H(3A) | 0.85(3)                    | C(14)-H(14A) | 0.9500                     |
| N(3)-H(3B) | 0.85(3)                    | C(15)-H(15A) | 0.9500                     |
| C(1)-C(2)  | 1.374(2)                   | C(16)-H(16A) | 0.9800                     |
| C(1)-C(10) | 1.473(2)                   | C(16)-H(16B) | 0.9800                     |
| C(2)-C(3)  | 1.400(2)                   | C(16)-H(16C) | 0.9800                     |
| C(3)-C(17) | 1.494(2)                   | C(13)-C(16)  | 1.509(3)                   |
| C(4)-C(9)  | 1.384(2)                   | C(14)-C(15)  | 1.390(3)                   |
| C(4)-C(5)  | 1.395(3)                   | C(14)-H(14A) | 0.9500                     |
| C(5)-C(6)  | 1.387(3)                   | C(15)-H(15A) | 0.9500                     |
| C(5)-H(5A) | 0.9500                     | C(16)-H(16A) | 0.9800                     |
| C(6)-C(7)  | 1.388(3)                   | C(16)-H(16B) | 0.9800                     |
| C(6)-H(6A) | 0.9500                     | C(16)-H(16C) | 0.9800                     |
| C(7)-C(8)  | 1.391(2)                   |              |                            |

| Bond           | Bond Angle / $^\circ$ | Bond              | Bond Angle / $^\circ$ |
|----------------|-----------------------|-------------------|-----------------------|
| O(1)-S-O(2)    | 119.12(8)             | C(9)-C(8)-H(8A)   | 120.1                 |
| O(1)-S-N(3)    | 107.22(8)             | C(7)-C(8)-H(8A)   | 120.1                 |
| O(2)-S-N(3)    | 106.96(8)             | C(4)-C(9)-C(8)    | 119.53(16)            |
| O(1)-S-C(7)    | 106.97(8)             | C(4)-C(9)-H(9A)   | 120.2                 |
| O(2)-S-C(7)    | 107.29(8)             | C(8)-C(9)-H(9A)   | 120.2                 |
| N(3)-S-C(7)    | 109.01(8)             | C(11)-C(10)-C(15) | 119.39(17)            |
| C(3)-N(1)-N(2) | 104.47(14)            | C(11)-C(10)-C(1)  | 120.40(17)            |
| N(1)-N(2)-C(1) | 112.83(14)            | C(15)-C(10)-C(1)  | 120.15(16)            |
| N(1)-N(2)-C(4) | 118.15(14)            | C(12)-C(11)-C(10) | 120.21(18)            |

|                  |            |                     |            |
|------------------|------------|---------------------|------------|
| C(1)-N(2)-C(4)   | 129.01(15) | C(12)-C(11)-H(11A)  | 119.9      |
| S-N(3)-H(3A)     | 112.2(17)  | C(10)-C(11)-H(11A)  | 119.9      |
| S-N(3)-H(3B)     | 110.6(18)  | C(11)-C(12)-C(13)   | 120.95(19) |
| H(3A)-N(3)-H(3B) | 117(2)     | C(11)-C(12)-H(12A)  | 119.5      |
| N(2)-C(1)-C(2)   | 105.00(15) | C(13)-C(12)-H(12A)  | 119.5      |
| N(2)-C(1)-C(10)  | 127.07(16) | C(12)-C(13)-C(14)   | 118.33(18) |
| C(2)-C(1)-C(10)  | 127.88(16) | C(12)-C(13)-C(16)   | 121.1(2)   |
| C(1)-C(2)-C(3)   | 106.27(16) | C(14)-C(13)-C(16)   | 120.5(2)   |
| C(1)-C(2)-Cl     | 125.33(15) | C(13)-C(14)-C(15)   | 121.34(19) |
| C(3)-C(2)-Cl     | 128.37(14) | C(13)-C(14)-H(14A)  | 119.3      |
| N(1)-C(3)-C(2)   | 111.43(16) | C(15)-C(14)-H(14A)  | 119.3      |
| N(1)-C(3)-C(17)  | 120.28(16) | C(10)-C(15)-C(14)   | 119.76(18) |
| C(2)-C(3)-C(17)  | 128.23(17) | C(10)-C(15)-H(15A)  | 120.1      |
| C(9)-C(4)-C(5)   | 120.85(16) | C(14)-C(15)-H(15A)  | 120.1      |
| C(9)-C(4)-N(2)   | 121.00(15) | C(13)-C(16)-H(16A)  | 109.5      |
| C(5)-C(4)-N(2)   | 118.14(15) | C(13)-C(16)-H(16B)  | 109.5      |
| C(6)-C(5)-C(4)   | 119.50(17) | H(16A)-C(16)-H(16B) | 109.5      |
| C(6)-C(5)-H(5A)  | 120.2      | C(13)-C(16)-H(16C)  | 109.5      |
| C(4)-C(5)-H(5A)  | 120.2      | H(16A)-C(16)-H(16C) | 109.5      |
| C(5)-C(6)-C(7)   | 119.74(17) | H(16B)-C(16)-H(16C) | 109.5      |
| C(5)-C(6)-H(6A)  | 120.1      | F(1)-C(17)-F(2)     | 107.60(16) |
| C(7)-C(6)-H(6A)  | 120.1      | F(1)-C(17)-F(3)     | 106.91(17) |
| C(6)-C(7)-C(8)   | 120.60(16) | F(2)-C(17)-F(3)     | 106.27(17) |
| C(6)-C(7)-S      | 119.62(13) | F(1)-C(17)-C(3)     | 112.68(15) |
| C(8)-C(7)-S      | 119.78(13) | F(2)-C(17)-C(3)     | 111.89(17) |
| C(9)-C(8)-C(7)   | 119.78(16) | F(3)-C(17)-C(3)     | 111.13(15) |

---



Table S7. Anisotropic displacement parameters ( $\text{\AA}^2 \times 10^3$ ) for JXC041. The anisotropic displacement factor exponent takes the form:  $-2p^2 [h^2 a^{*2}U^{11} + \dots + 2 h k a^* b^* U^{12}]$

|       | $U^{11}$ | $U^{22}$ | $U^{33}$ | $U^{23}$ | $U^{13}$ | $U^{12}$ |
|-------|----------|----------|----------|----------|----------|----------|
| Cl    | 37(1)    | 28(1)    | 32(1)    | -14(1)   | 14(1)    | -11(1)   |
| S     | 12(1)    | 20(1)    | 16(1)    | -5(1)    | 0(1)     | -3(1)    |
| F(1)  | 41(1)    | 43(1)    | 33(1)    | -14(1)   | 15(1)    | -26(1)   |
| F(2)  | 41(1)    | 16(1)    | 91(1)    | -7(1)    | 1(1)     | -6(1)    |
| F(3)  | 65(1)    | 48(1)    | 25(1)    | -5(1)    | -5(1)    | -35(1)   |
| O(1)  | 15(1)    | 30(1)    | 20(1)    | -4(1)    | 3(1)     | -5(1)    |
| O(2)  | 15(1)    | 30(1)    | 21(1)    | -6(1)    | -3(1)    | -4(1)    |
| N(1)  | 19(1)    | 16(1)    | 20(1)    | -2(1)    | 0(1)     | -5(1)    |
| N(2)  | 18(1)    | 16(1)    | 20(1)    | -3(1)    | 1(1)     | -5(1)    |
| N(3)  | 14(1)    | 21(1)    | 23(1)    | -3(1)    | -1(1)    | -3(1)    |
| C(1)  | 19(1)    | 18(1)    | 18(1)    | -1(1)    | 1(1)     | -2(1)    |
| C(2)  | 23(1)    | 19(1)    | 20(1)    | -4(1)    | 3(1)     | -4(1)    |
| C(3)  | 23(1)    | 17(1)    | 19(1)    | -2(1)    | -1(1)    | -5(1)    |
| C(4)  | 18(1)    | 16(1)    | 19(1)    | -4(1)    | -1(1)    | -3(1)    |
| C(5)  | 16(1)    | 31(1)    | 37(1)    | -16(1)   | 0(1)     | -7(1)    |
| C(6)  | 13(1)    | 32(1)    | 36(1)    | -16(1)   | 2(1)     | -3(1)    |
| C(7)  | 15(1)    | 19(1)    | 18(1)    | -4(1)    | 0(1)     | -2(1)    |
| C(8)  | 15(1)    | 24(1)    | 23(1)    | -7(1)    | 1(1)     | -5(1)    |
| C(9)  | 13(1)    | 25(1)    | 25(1)    | -6(1)    | 1(1)     | -3(1)    |
| C(10) | 20(1)    | 18(1)    | 19(1)    | -4(1)    | 2(1)     | -4(1)    |
| C(11) | 22(1)    | 19(1)    | 39(1)    | 3(1)     | -1(1)    | -2(1)    |
| C(12) | 32(1)    | 20(1)    | 43(1)    | 5(1)     | 2(1)     | -9(1)    |
| C(13) | 28(1)    | 29(1)    | 30(1)    | -7(1)    | 4(1)     | -14(1)   |
| C(14) | 18(1)    | 37(1)    | 34(1)    | -2(1)    | -4(1)    | -7(1)    |
| C(15) | 24(1)    | 26(1)    | 28(1)    | 3(1)     | -2(1)    | -3(1)    |
| C(16) | 41(1)    | 50(2)    | 50(2)    | -5(1)    | 4(1)     | -30(1)   |
| C(17) | 27(1)    | 21(1)    | 23(1)    | -4(1)    | 4(1)     | -8(1)    |

Table S8. Hydrogen coordinates ( $\times 10^4$ ) and isotropic displacement parameters ( $\text{\AA}^2 \times 10^3$ ) for JXC041.

|        | x        | y         | z        | U(eq) |
|--------|----------|-----------|----------|-------|
| H(3A)  | 1440(30) | 10800(30) | 4439(18) | 28(6) |
| H(3B)  | 3240(40) | 10820(30) | 4426(19) | 30(6) |
| H(5A)  | 1217     | 5082      | 3460     | 32    |
| H(6A)  | 665      | 7122      | 4517     | 32    |
| H(8A)  | 5650     | 7352      | 4437     | 24    |
| H(9A)  | 6213     | 5272      | 3407     | 25    |
| H(11A) | 5059     | 6209      | 990      | 32    |
| H(12A) | 7135     | 7696      | 477      | 38    |
| H(14A) | 10672    | 4287      | 1730     | 35    |
| H(15A) | 8605     | 2798      | 2263     | 31    |
| H(16A) | 11558    | 6545      | 961      | 66    |
| H(16B) | 10504    | 7288      | 36       | 66    |
| H(16C) | 10196    | 8155      | 1021     | 66    |

31 Y

PLATON-Dec 17 04:27:46 2021 - (130721)

Z -61

JXC041

P -1

R = 0.04

RES= 0 33 X

NOMOVE FORCED

Prob = 50  
Temp = 150

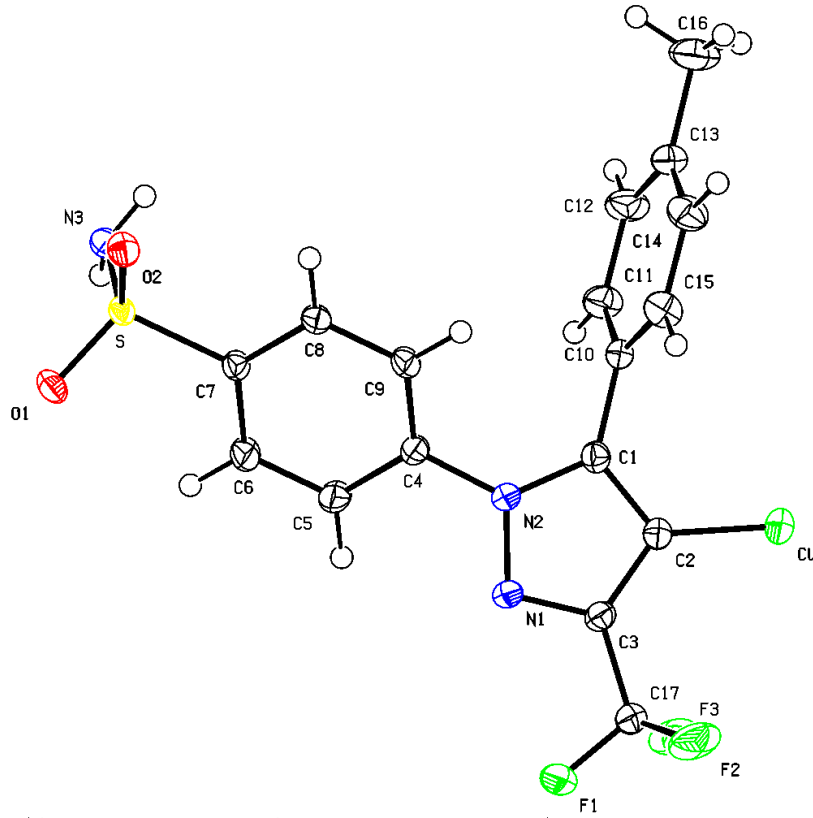

## NMR Spectra

| No. | NMR Spectra                                                                                                                                 | Page    |
|-----|---------------------------------------------------------------------------------------------------------------------------------------------|---------|
| 1   | $^1\text{H}$ and $^{13}\text{C}\{^1\text{H}\}$ NMR spectra of 4-chloro-3,5-dimethylpyrazole <b>1a</b>                                       | S21     |
| 2   | $^1\text{H}$ and $^{13}\text{C}\{^1\text{H}\}$ NMR spectra of 4-chloropyrazole <b>1b</b>                                                    | S22     |
| 3   | $^1\text{H}$ and $^{13}\text{C}\{^1\text{H}\}$ NMR spectra of 4-chloro-3,5-diphenylpyrazole <b>1c</b>                                       | S23     |
| 4   | $^1\text{H}$ and $^{13}\text{C}\{^1\text{H}\}$ NMR spectra of 4-chloro-3,5-dimethyl-1 <i>H</i> -pyrazole-1-carboxamide <b>1d</b>            | S24     |
| 5   | $^1\text{H}$ and $^{13}\text{C}\{^1\text{H}\}$ NMR spectra of 4-chloro-1-(tetrahydro-2 <i>H</i> -pyran-2-yl)-1 <i>H</i> -pyrazole <b>1e</b> | S25     |
| 6   | $^1\text{H}$ and $^{13}\text{C}\{^1\text{H}\}$ NMR spectra of 4-chloro-3,5-dimethyl-1-phenyl-1 <i>H</i> -pyrazole <b>1f</b>                 | S26     |
| 7   | $^1\text{H}$ NMR spectra of side product <b>1f-2</b> and <b>1f-3</b>                                                                        | S27     |
| 8   | $^1\text{H}$ and $^{13}\text{C}\{^1\text{H}\}$ NMR spectra of 4-chloro-1-phenylpyrazole <b>1g</b>                                           | S28     |
| 9   | $^1\text{H}$ and $^{13}\text{C}\{^1\text{H}\}$ NMR spectra of 4-chloro-1-(4-methoxyphenyl)-1 <i>H</i> -pyrazole <b>1h</b>                   | S29     |
| 10  | $^1\text{H}$ and $^{13}\text{C}\{^1\text{H}\}$ NMR spectra of 1-(4-bromophenyl)-4-chloro-1 <i>H</i> -pyrazole <b>1i</b>                     | S30-S31 |
| 11  | $^1\text{H}$ and $^{13}\text{C}\{^1\text{H}\}$ NMR spectra of 4-(4-chloro-1 <i>H</i> -pyrazol-1-yl)benzaldehyde <b>1j</b>                   | S32     |
| 12  | $^1\text{H}$ and $^{13}\text{C}\{^1\text{H}\}$ NMR spectra of 4-(4-chloro-1 <i>H</i> -pyrazol-1-yl)benzotrile <b>1k</b>                     | S33     |
| 13  | $^1\text{H}$ and $^{13}\text{C}\{^1\text{H}\}$ NMR spectra of 4-chloro-1-(4-nitrophenyl)-1 <i>H</i> -pyrazole <b>1l</b>                     | S34     |
| 14  | $^1\text{H}$ and $^{13}\text{C}\{^1\text{H}\}$ NMR spectra of 2-(4-chloro-1 <i>H</i> -pyrazol-1-yl)pyridine <b>1m</b>                       | S35     |
| 15  | $^1\text{H}$ , $^{13}\text{C}\{^1\text{H}\}$ and $^{19}\text{F}\{^1\text{H}\}$ NMR spectra 4-chloro-celecoxib <b>1n</b>                     | S36-S37 |

4-Chloro-3,5-dimethylpyrazole **1a**

$^1\text{H}$ ,  $\text{CDCl}_3$

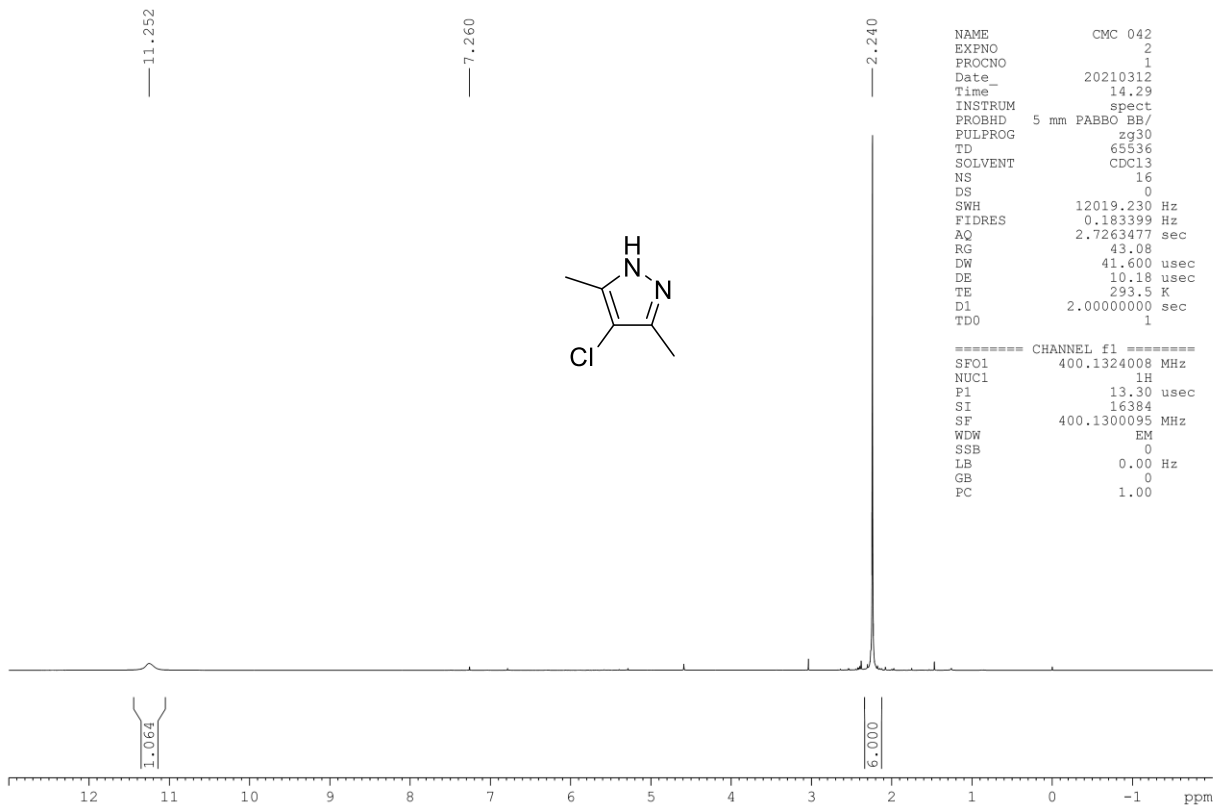

$^{13}\text{C}\{^1\text{H}\}$ ,  $\text{CDCl}_3$

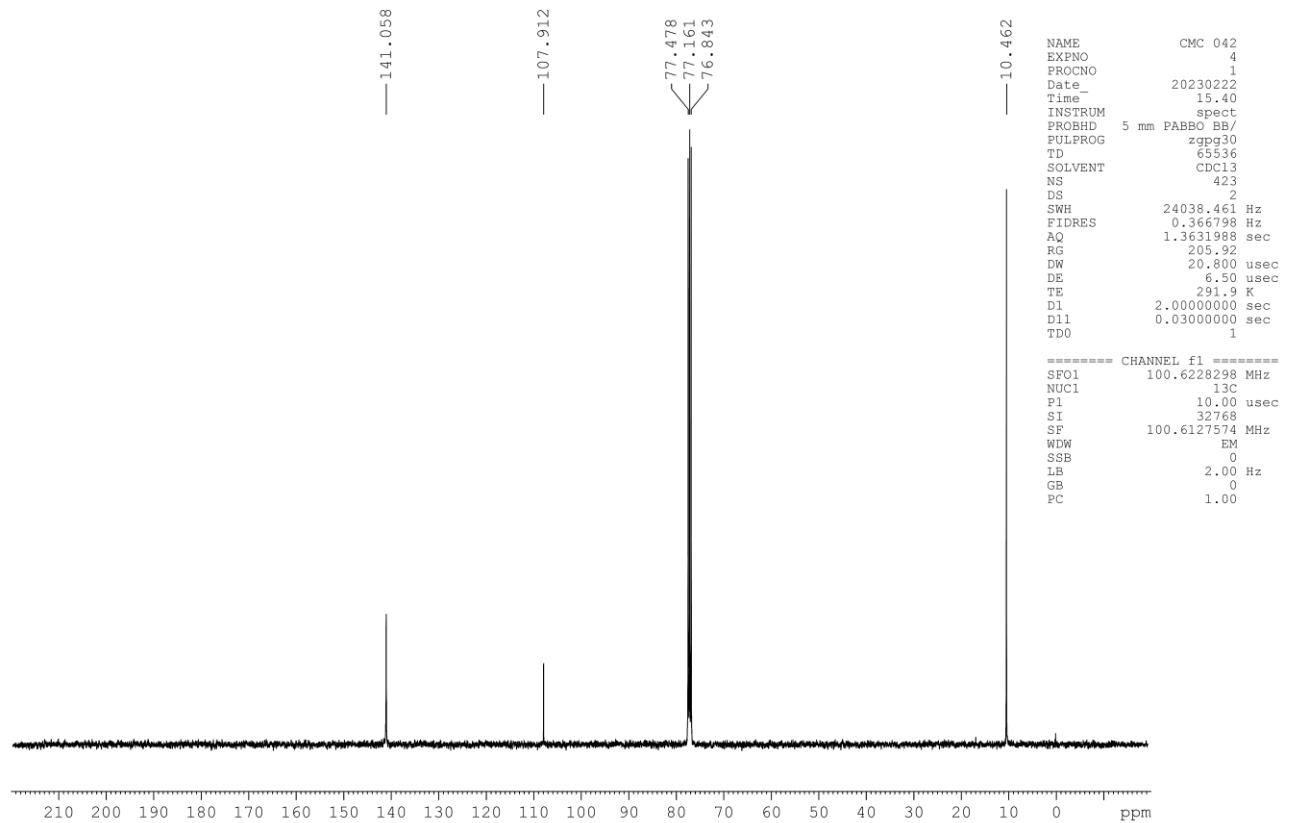

4-Chloropyrazole **1b**

$^1\text{H}$ ,  $\text{CDCl}_3$

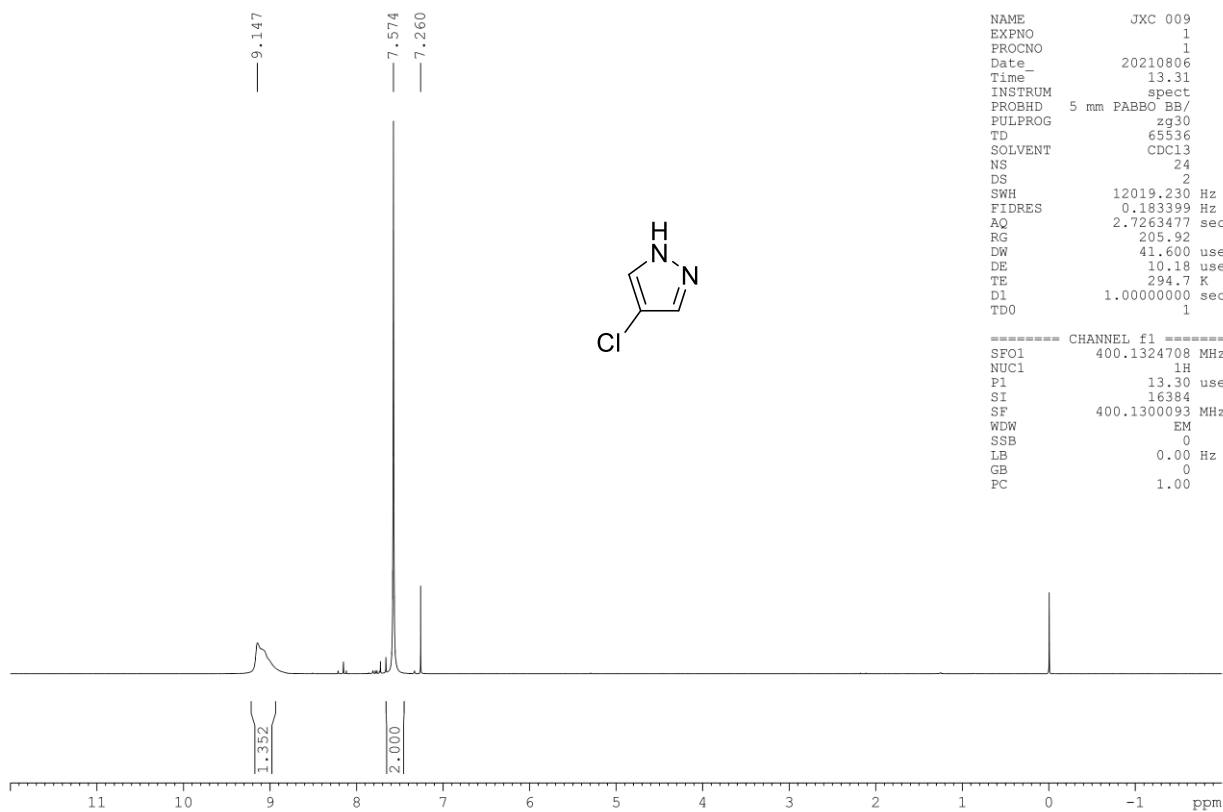

$^{13}\text{C}\{^1\text{H}\}$ ,  $\text{CDCl}_3$

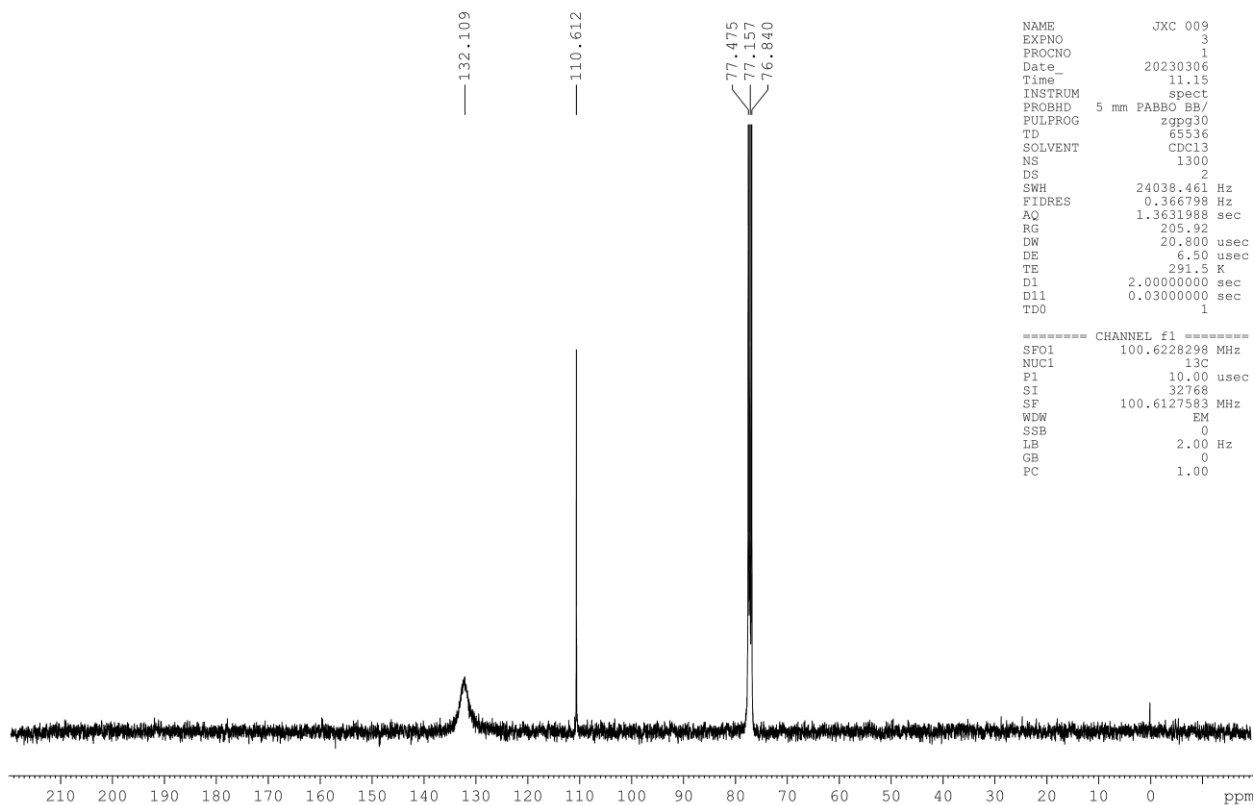

# 4-Chloro-3,5-diphenylpyrazole 1c

$^1\text{H}$ ,  $\text{CDCl}_3$

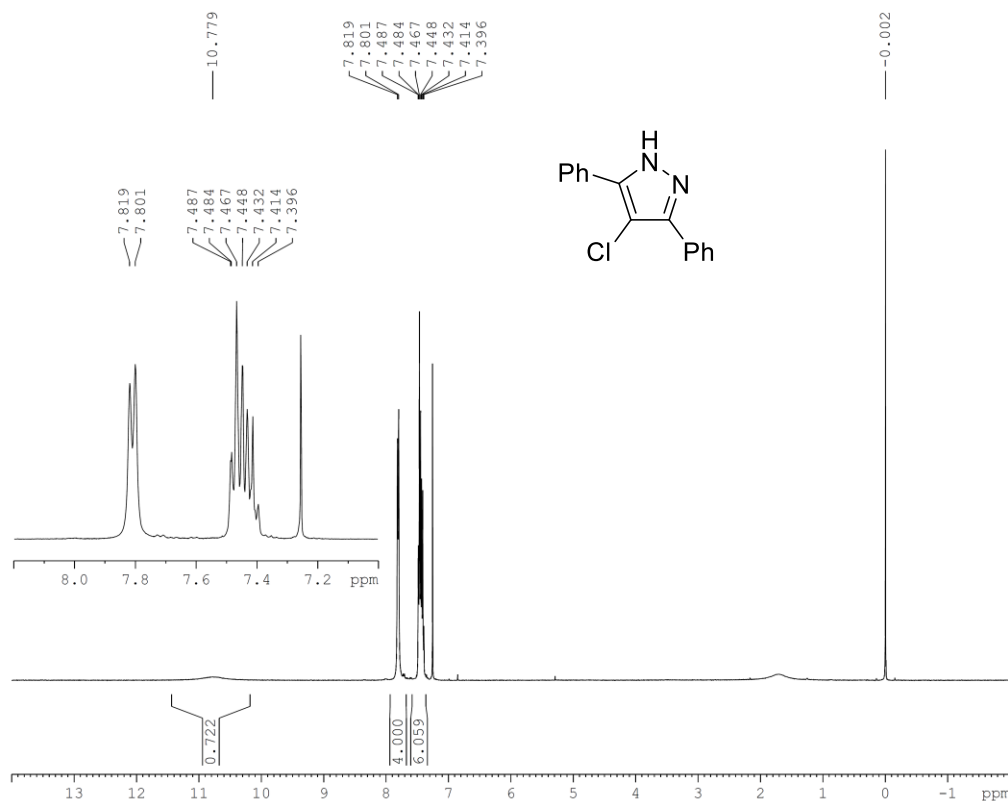

```

NAME          CMC 052
EXPNO         1
PROCNO        1
Date_         20210430
Time          15.01
INSTRUM       spect
PROBHD        5 mm PABBO BB/
PULPROG       zg30
TD            65536
SOLVENT       CDCl3
NS            32
DS            0
SWH           12019.230 Hz
FIDRES        0.183399 Hz
AQ            2.7263477 sec
RG            181.8
DW            41.600 usec
DE            10.18 usec
TE            293.9 K
D1            2.00000000 sec
D10           1
    
```

```

===== CHANNEL f1 =====
SFO1          400.1324008 MHz
NUC1           1H
P1            13.30 usec
SI            16384
SF            400.1300111 MHz
WDW           EM
SSB           0
LB            0.00 Hz
GB            0
PC            1.00
    
```

$^{13}\text{C}\{^1\text{H}\}$ ,  $\text{CDCl}_3$

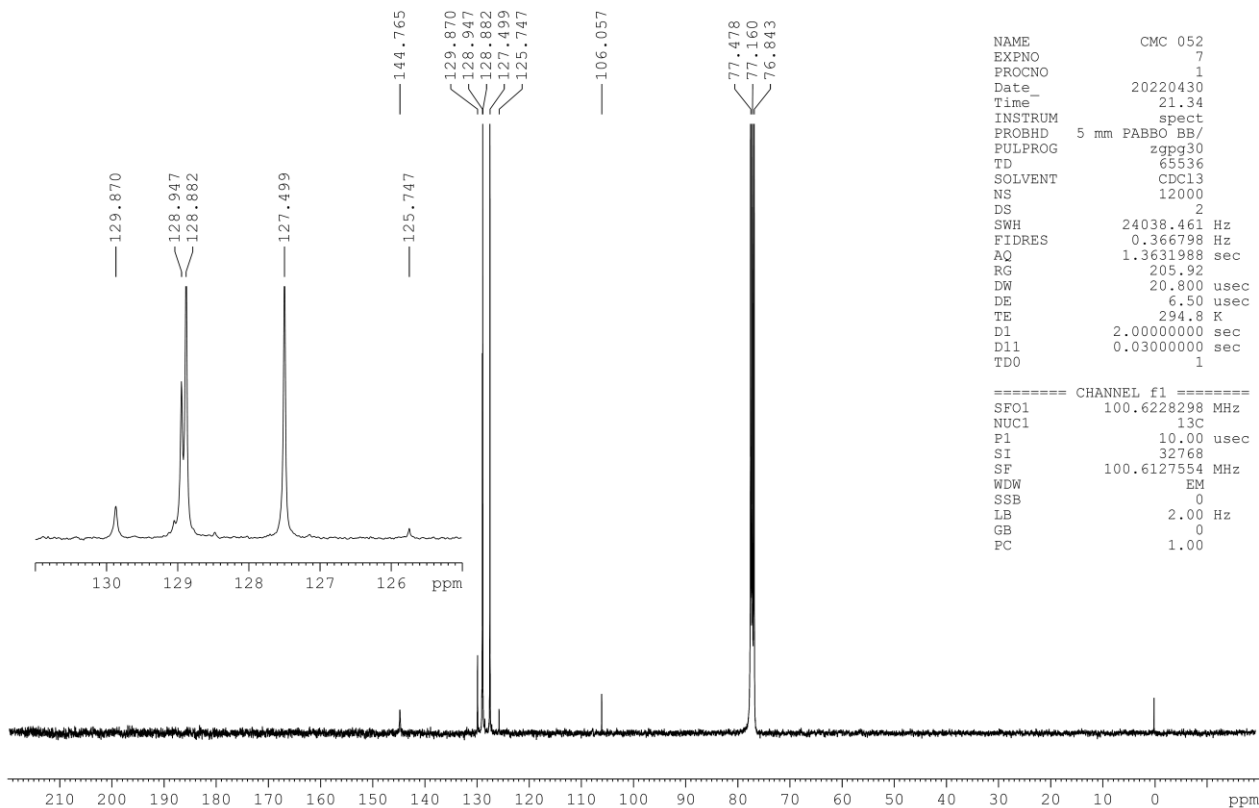

```

NAME          CMC 052
EXPNO         7
PROCNO        1
Date_         20220430
Time          21.34
INSTRUM       spect
PROBHD        5 mm PABBO BB/
PULPROG       zgpg30
TD            65536
SOLVENT       CDCl3
NS            12000
DS            2
SWH           24038.461 Hz
FIDRES        0.366798 Hz
AQ            1.3631988 sec
RG            205.92
DW            20.800 usec
DE            6.50 usec
TE            294.8 K
D1            2.00000000 sec
D11           0.03000000 sec
D10           1
    
```

```

===== CHANNEL f1 =====
SFO1          100.6228298 MHz
NUC1           13C
P1            10.00 usec
SI            32768
SF            100.6127554 MHz
WDW           EM
SSB           0
LB            2.00 Hz
GB            0
PC            1.00
    
```

4-Chloro-3,5-dimethyl-1H-pyrazole-1-carboxamide **1d**

$^1\text{H}$ ,  $\text{CDCl}_3$

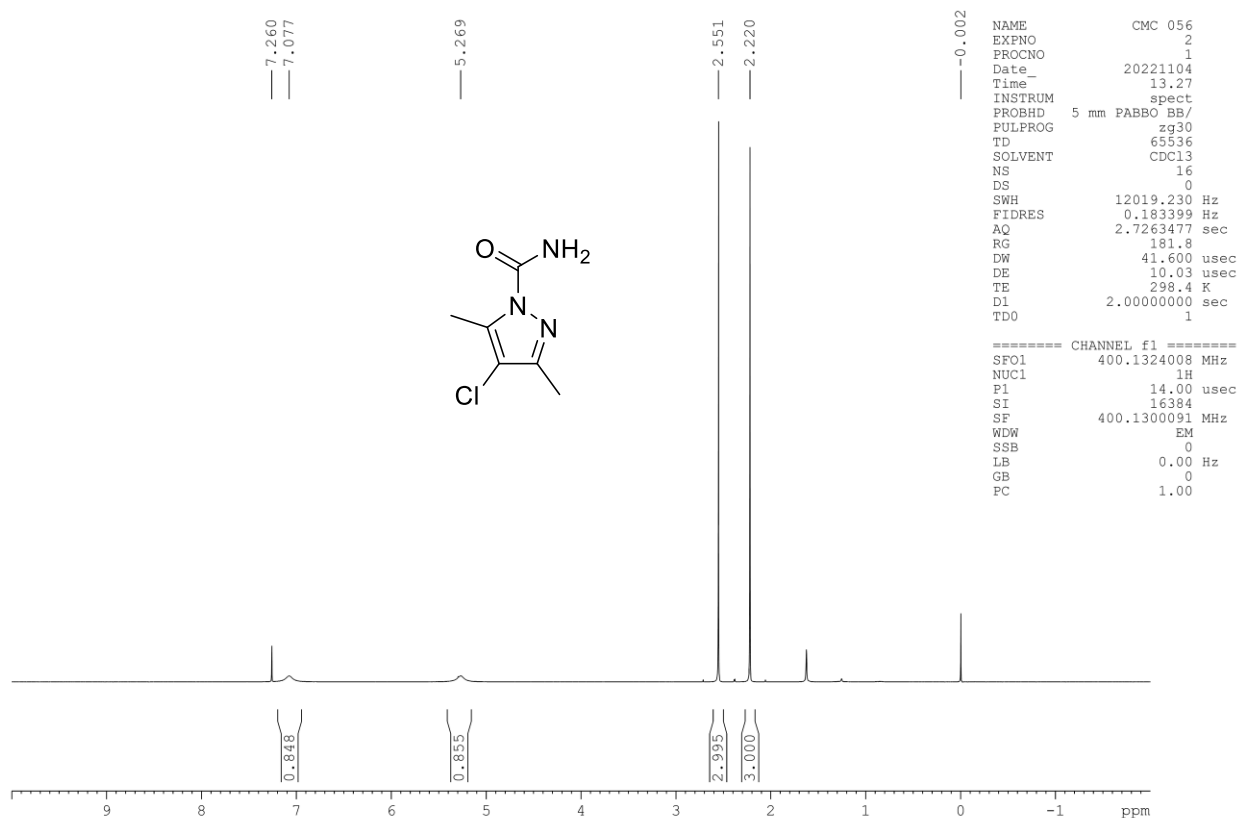

$^{13}\text{C}\{^1\text{H}\}$ ,  $\text{CDCl}_3$

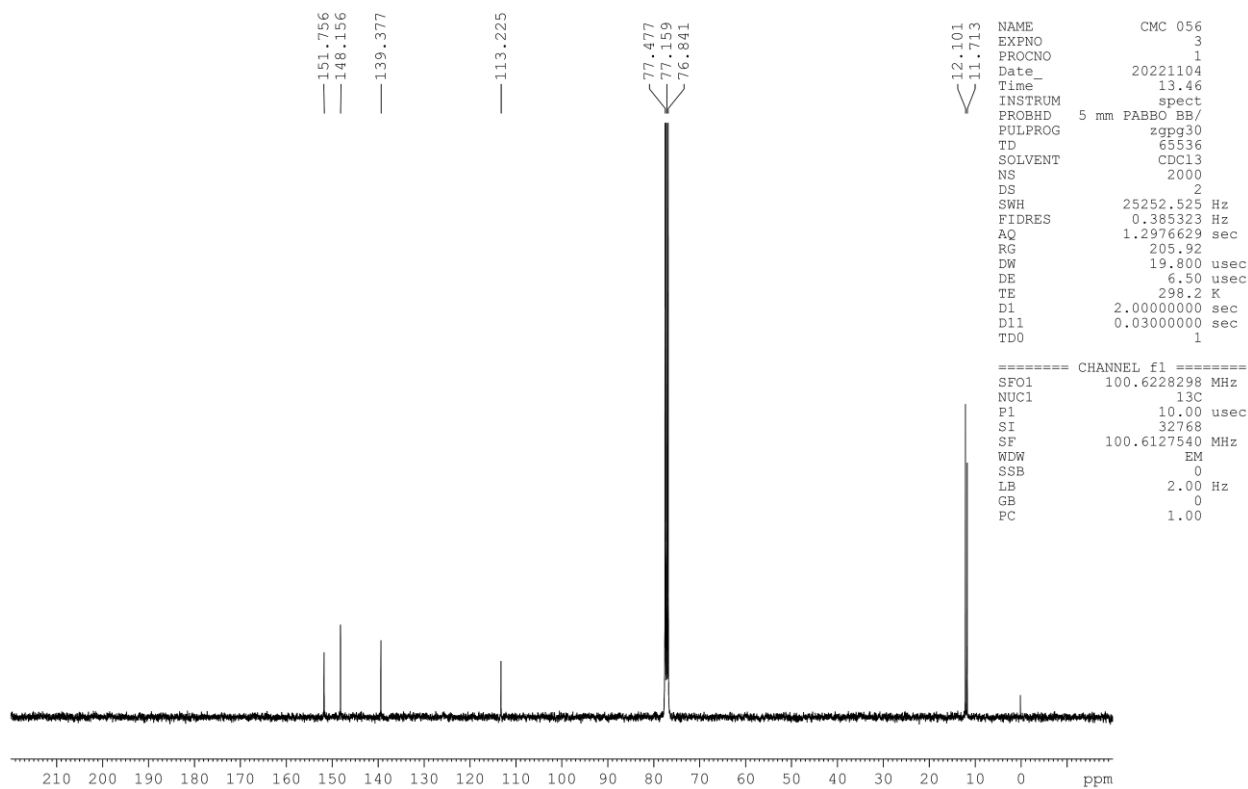



4-Chloro-1-(tetrahydro-2H-pyran-2-yl)-1H-pyrazole **1e**

$^1\text{H}$ ,  $\text{CDCl}_3$

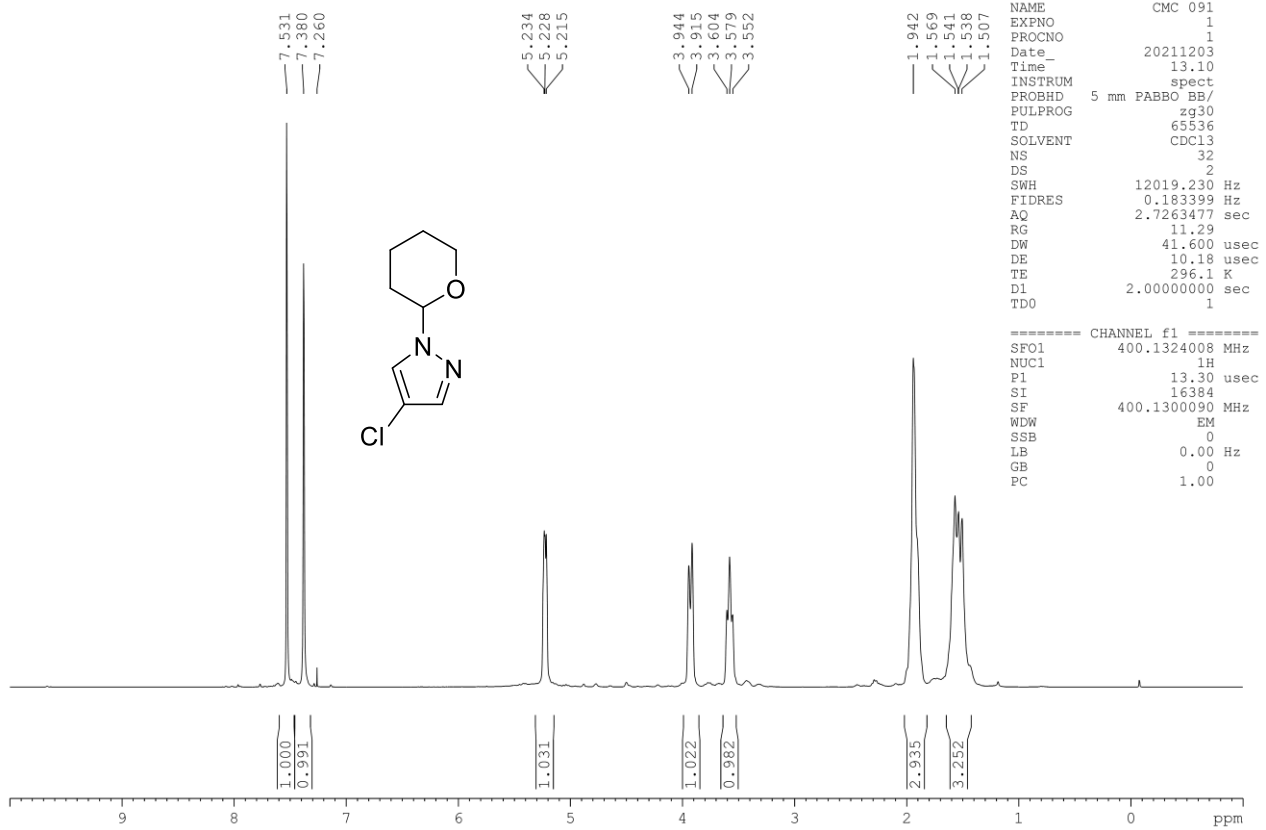

$^{13}\text{C}\{^1\text{H}\}$ ,  $\text{CDCl}_3$

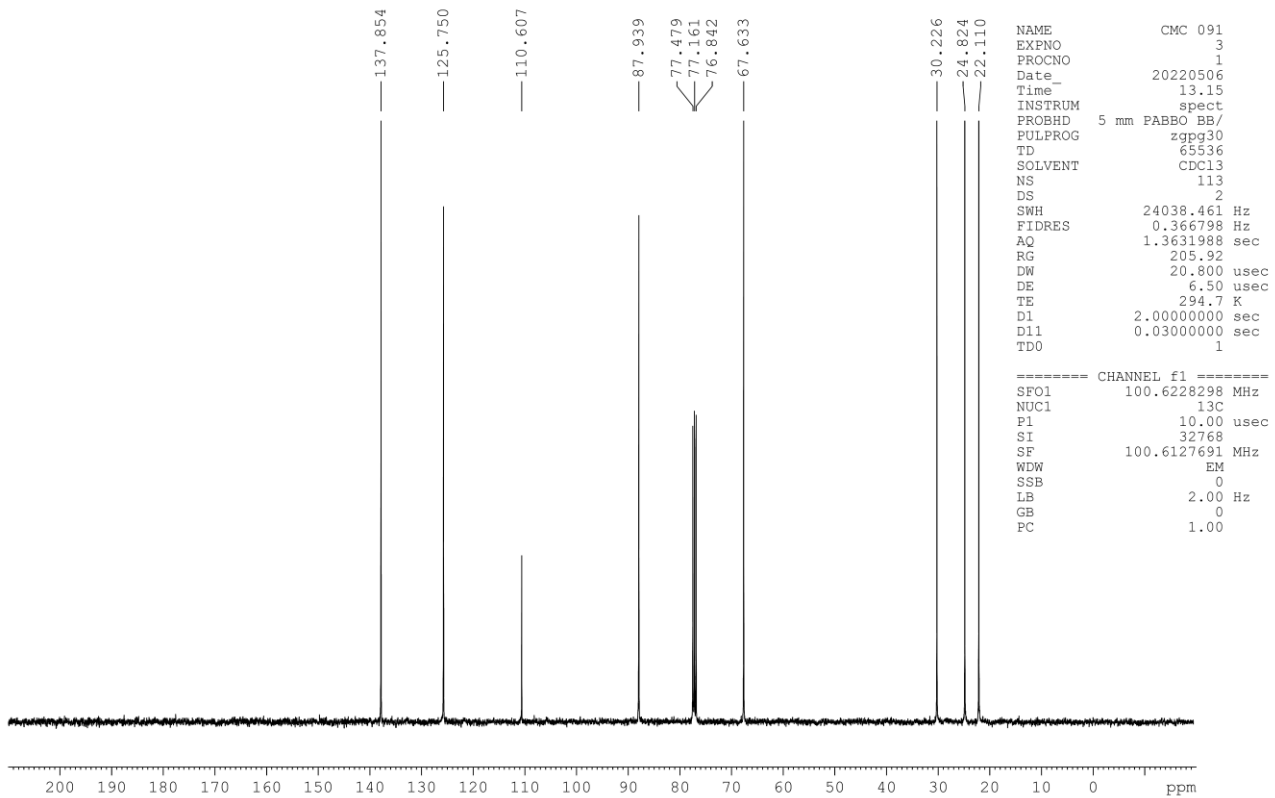

4-Chloro-3,5-dimethyl-1-phenylpyrazole **1f**

$^1\text{H}$ ,  $\text{CDCl}_3$

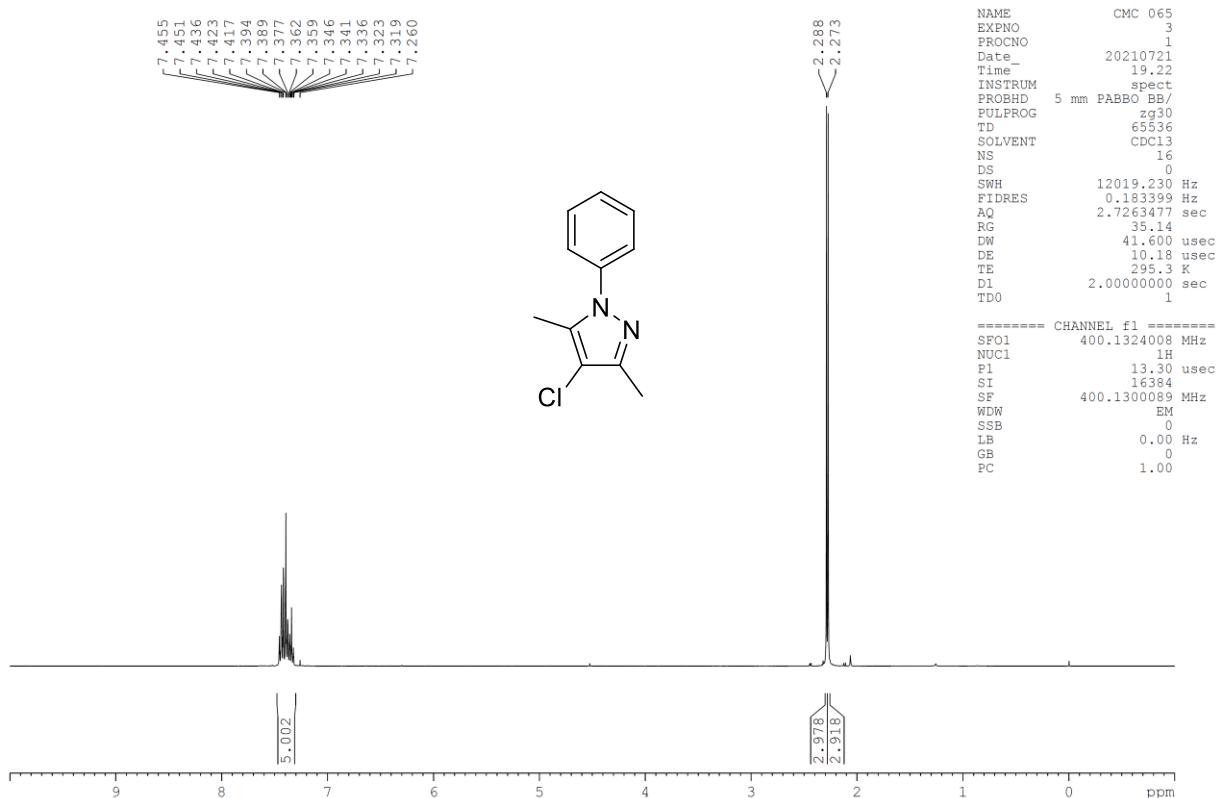

$^{13}\text{C}\{^1\text{H}\}$ ,  $\text{CDCl}_3$

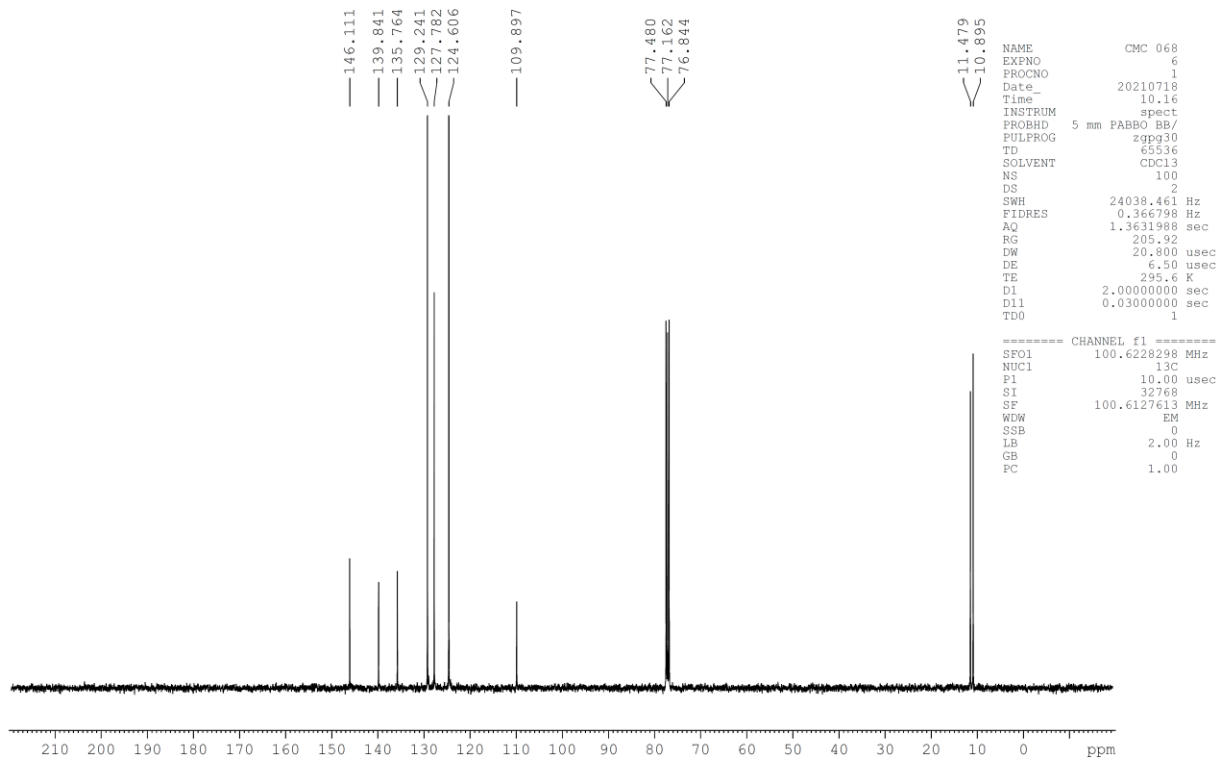

di-chlorinated side product of 3,5-dimethyl-1-phenylpyrazole **1f-2**

<sup>1</sup>H, CDCl<sub>3</sub>

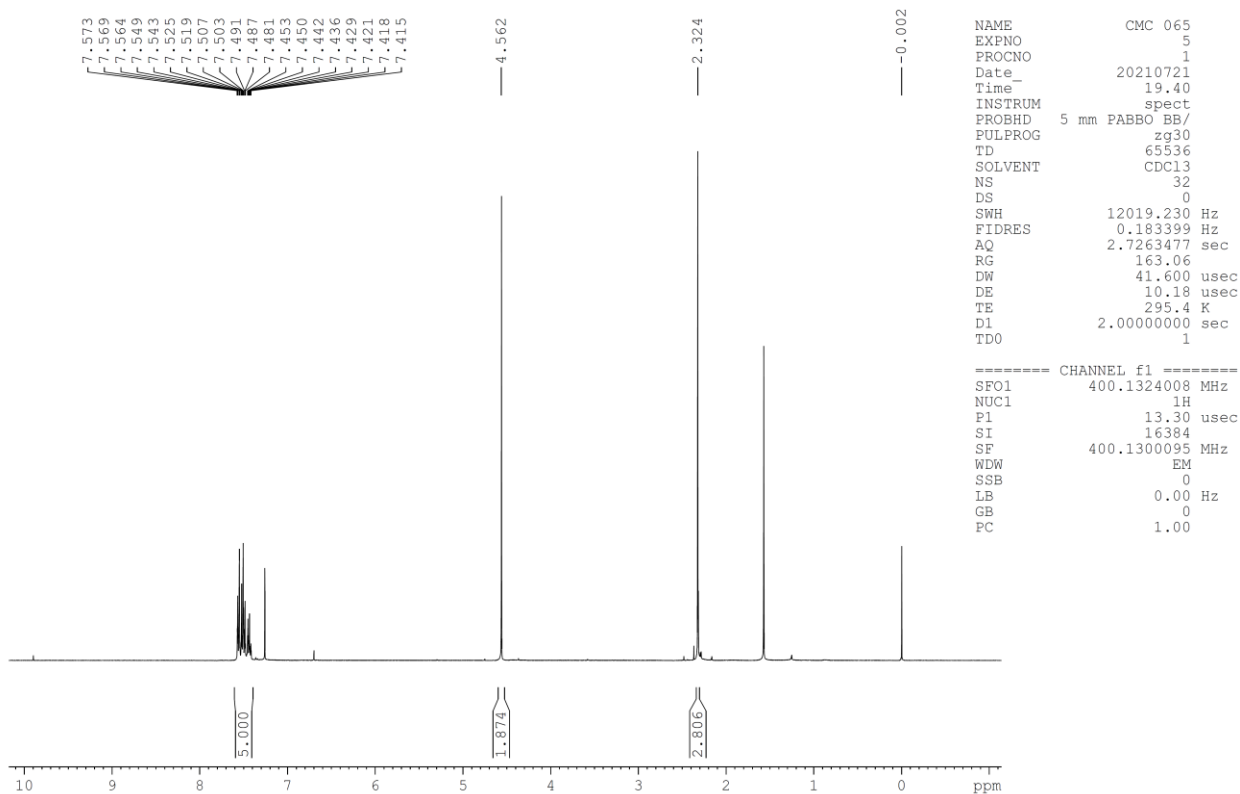

di-chlorinated side product of 3,5-dimethyl-1-phenylpyrazole **1f-3**

<sup>1</sup>H, CDCl<sub>3</sub>

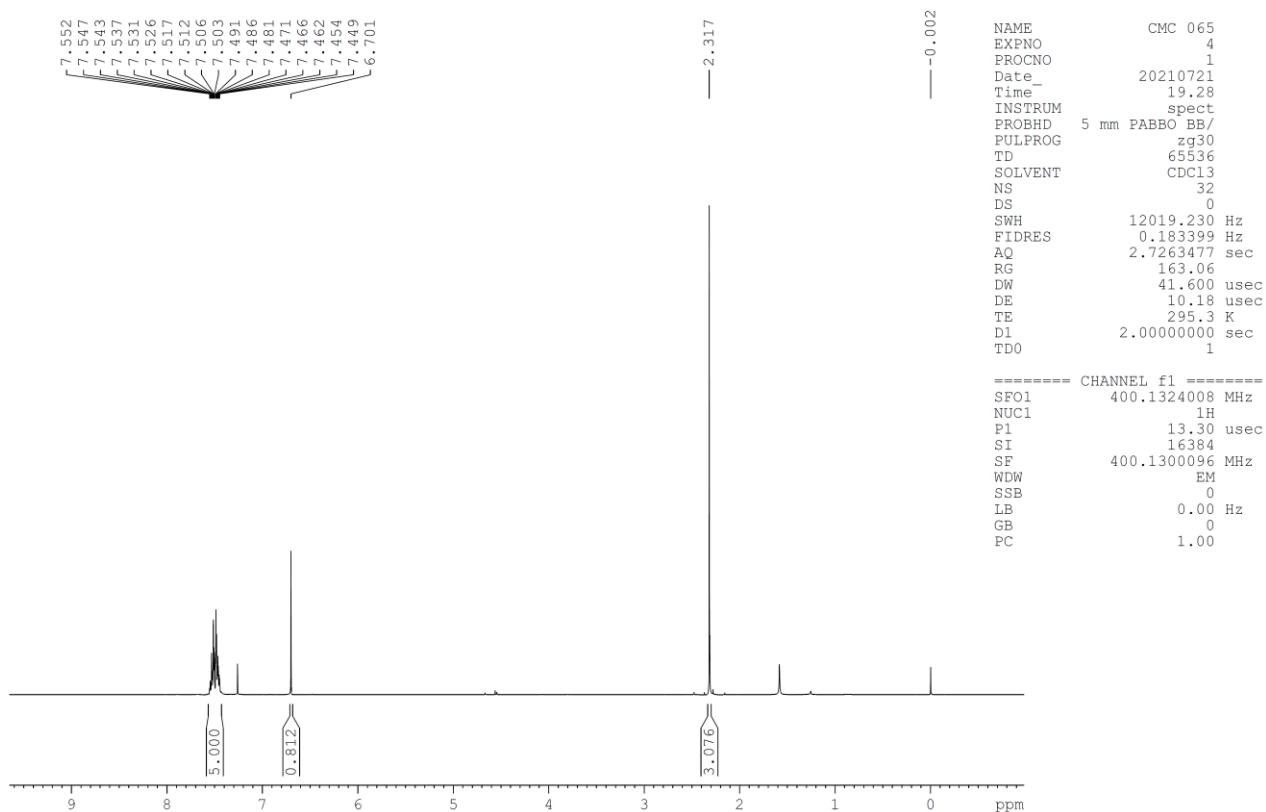

4-Chloro-1-phenylpyrazole **1g**

$^1\text{H}$ ,  $\text{CDCl}_3$

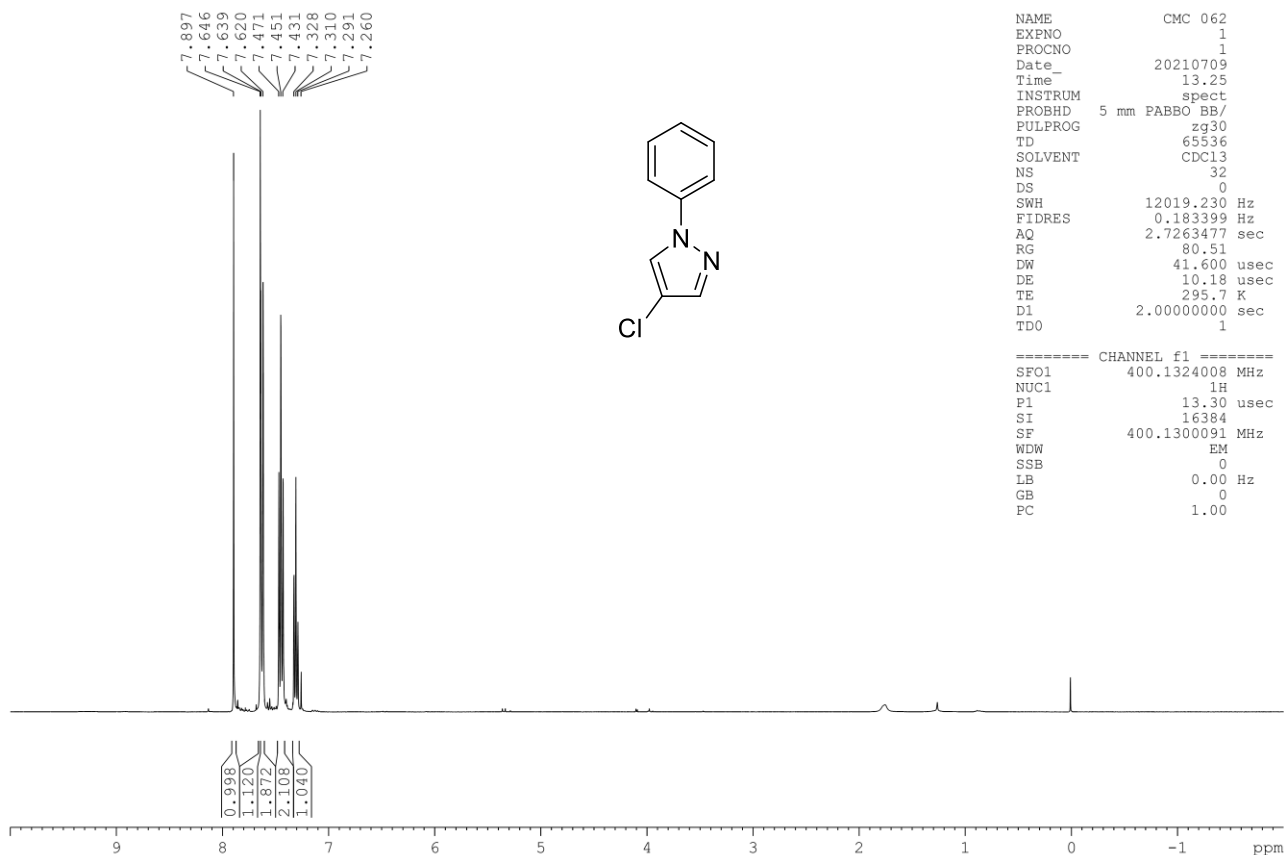

$^{13}\text{C}\{^1\text{H}\}$ ,  $\text{CDCl}_3$

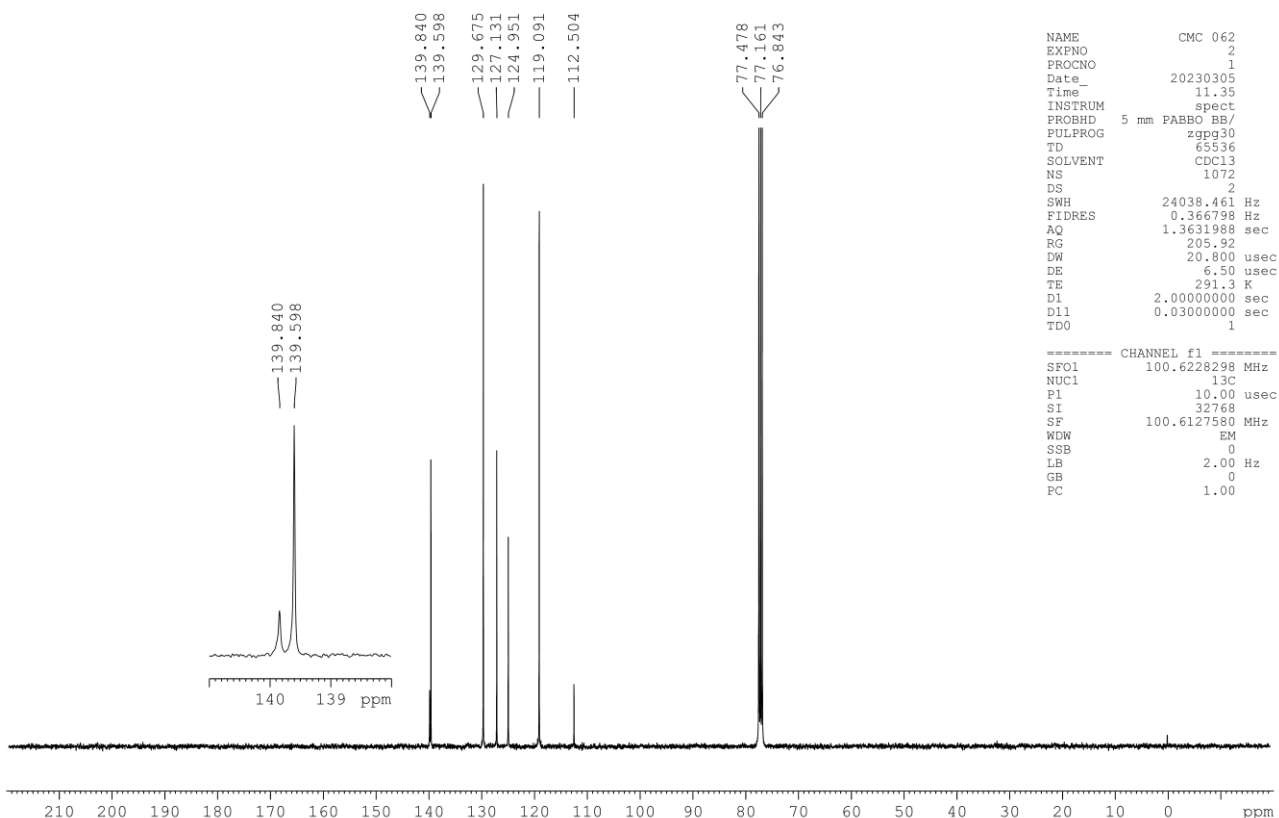

4-chloro-1-(4-methoxyphenyl)pyrazole **1h**

$^1\text{H}$ ,  $\text{CDCl}_3$

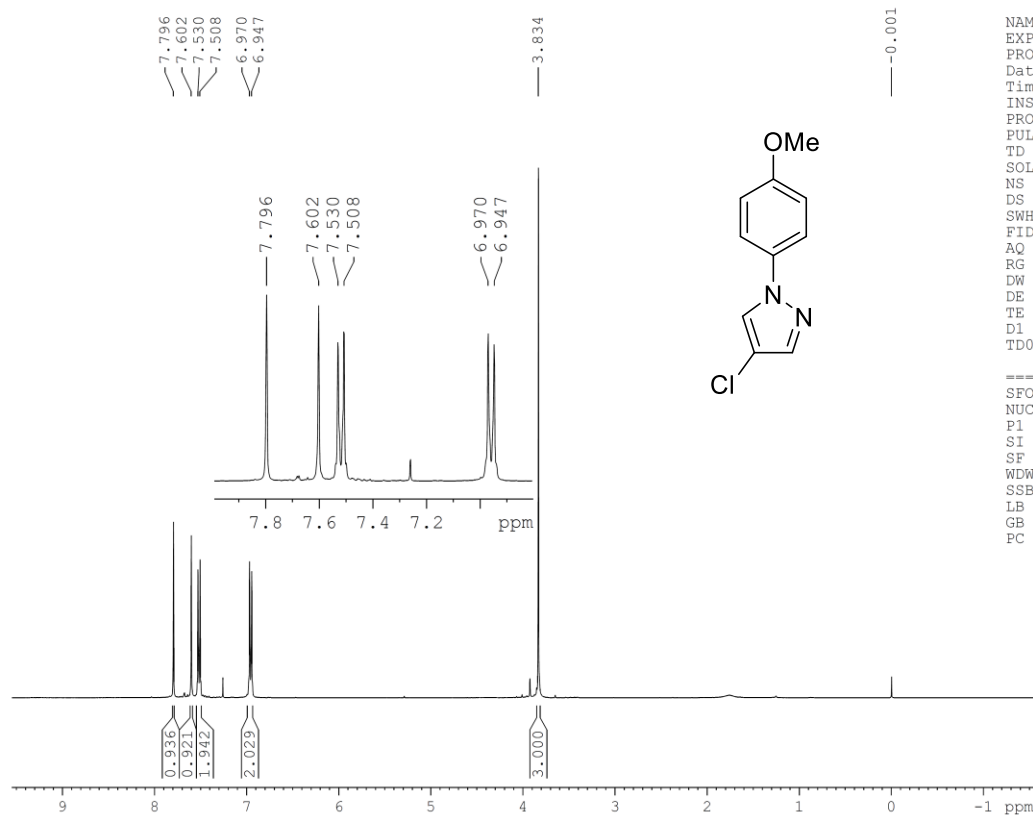

```

NAME          CMC 075
EXPNO         1
PROCNO        1
Date_         20210806
Time_         13.41
INSTRUM       spect
PROBHD        5 mm PABBO BB/
PULPROG       zg30
TD            65536
SOLVENT       CDCl3
NS            32
DS            0
SWH           12019.230 Hz
FIDRES        0.183399 Hz
AQ            2.7263477 sec
RG            91.1
DW            41.600 usec
DE            10.18 usec
TE            294.7 K
D1            2.00000000 sec
TD0           1
    
```

```

===== CHANNEL f1 =====
SFO1          400.1324008 MHz
NUC1          1H
P1            13.30 usec
SI            16384
SF            400.1300093 MHz
WDW           EM
SSB           0
LB            0.00 Hz
GB            0
PC            1.00
    
```

$^{13}\text{C}\{^1\text{H}\}$ ,  $\text{CDCl}_3$

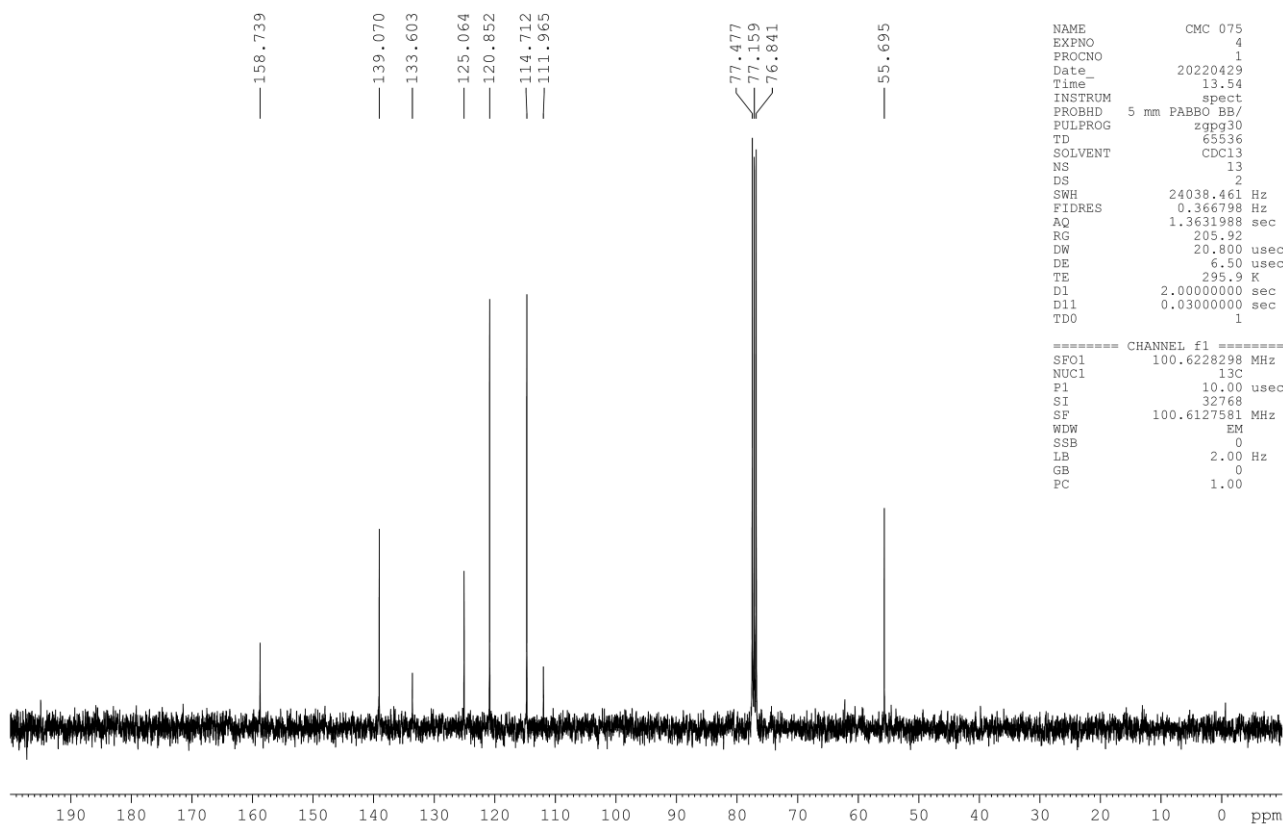

```

NAME          CMC 075
EXPNO         4
PROCNO        1
Date_         20220429
Time_         13.54
INSTRUM       spect
PROBHD        5 mm PABBO BB/
PULPROG       zgpg30
TD            65536
SOLVENT       CDCl3
NS            13
DS            2
SWH           24038.461 Hz
FIDRES        0.366798 Hz
AQ            1.3631988 sec
RG            205.92
DW            20.800 usec
DE            6.50 usec
TE            295.9 K
D1            2.00000000 sec
D11           0.03000000 sec
TD0           1
    
```

```

===== CHANNEL f1 =====
SFO1          100.6228298 MHz
NUC1          13C
P1            10.00 usec
SI            32768
SF            100.6127581 MHz
WDW           EM
SSB           0
LB            2.00 Hz
GB            0
PC            1.00
    
```

4-Chloro-1-(4-bromophenyl)pyrazole **1i**

<sup>1</sup>H, CDCl<sub>3</sub>

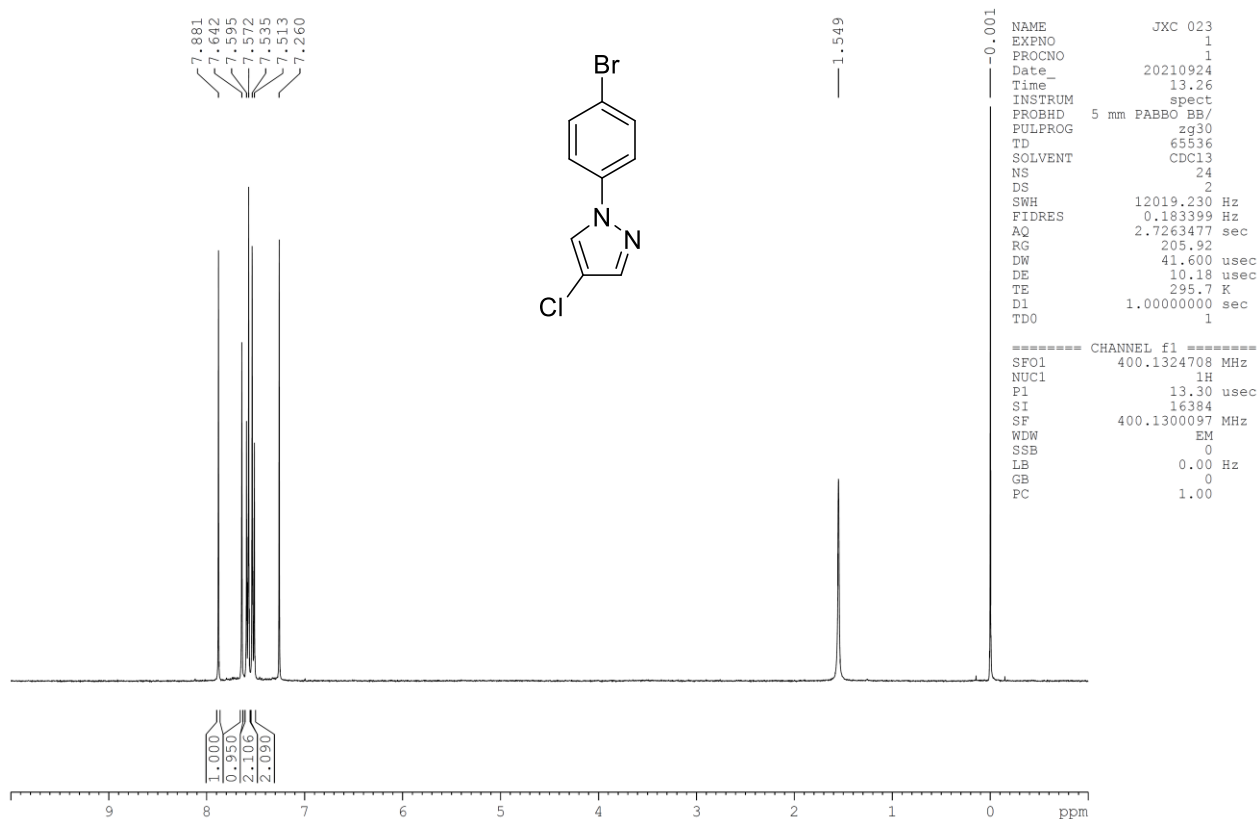

<sup>1</sup>H, acetone-d<sub>6</sub>

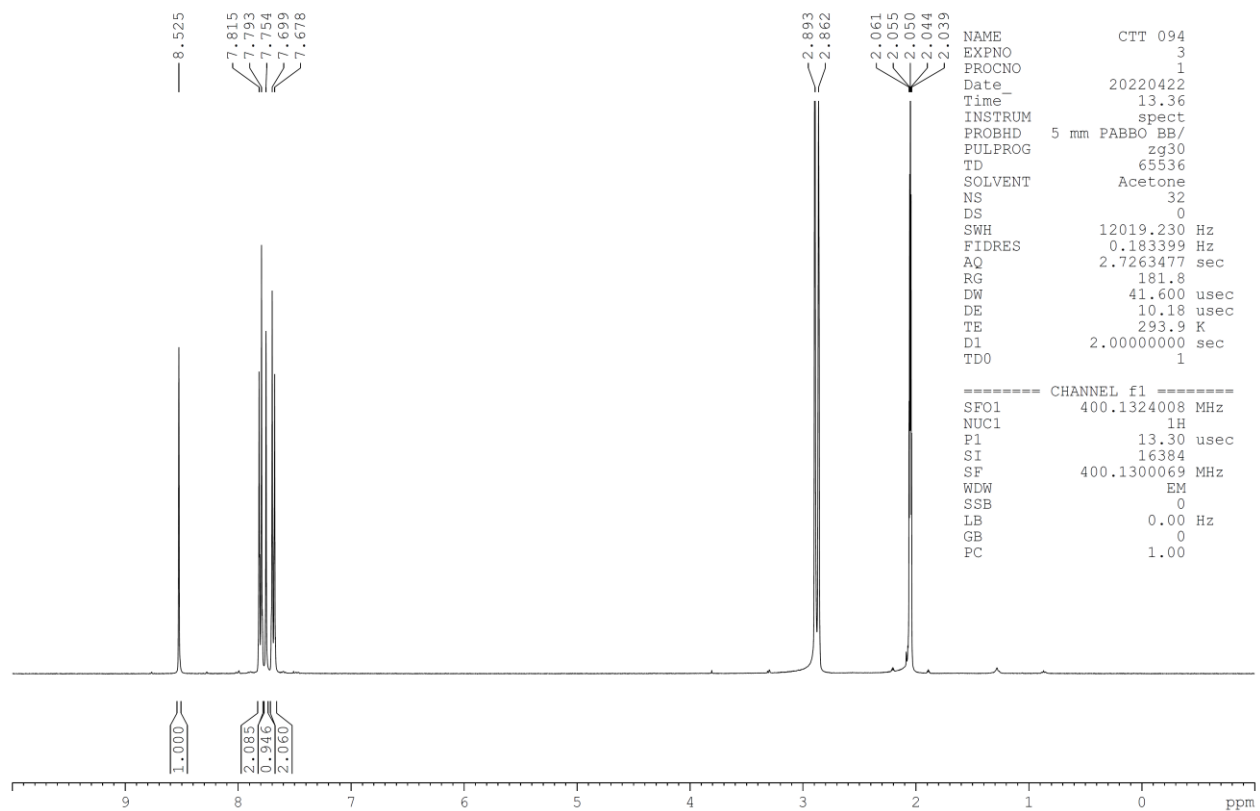

4-Chloro-1-(4-bromophenyl)pyrazole **1i**

$^{13}\text{C}\{^1\text{H}\}$ ,  $\text{CDCl}_3$

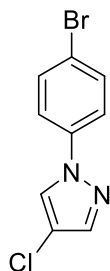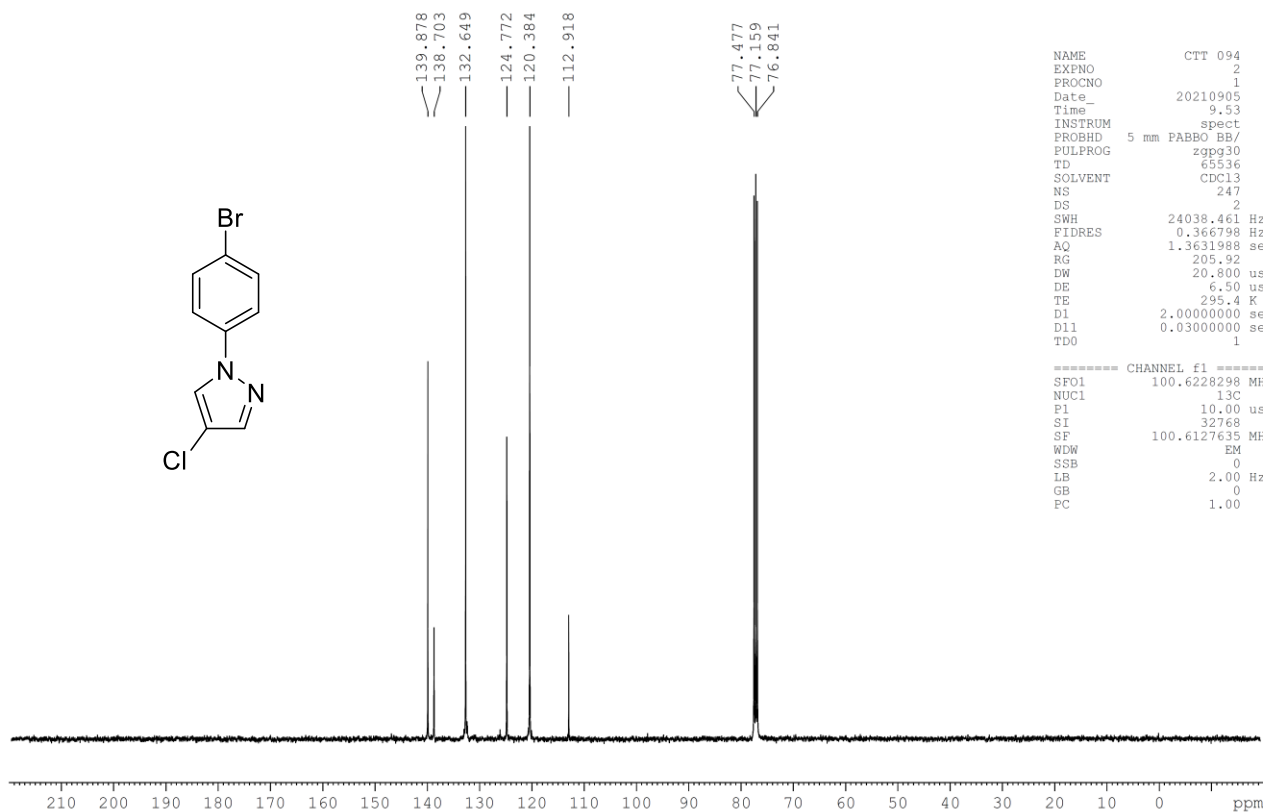

$^{13}\text{C}\{^1\text{H}\}$ , acetone- $d_6$

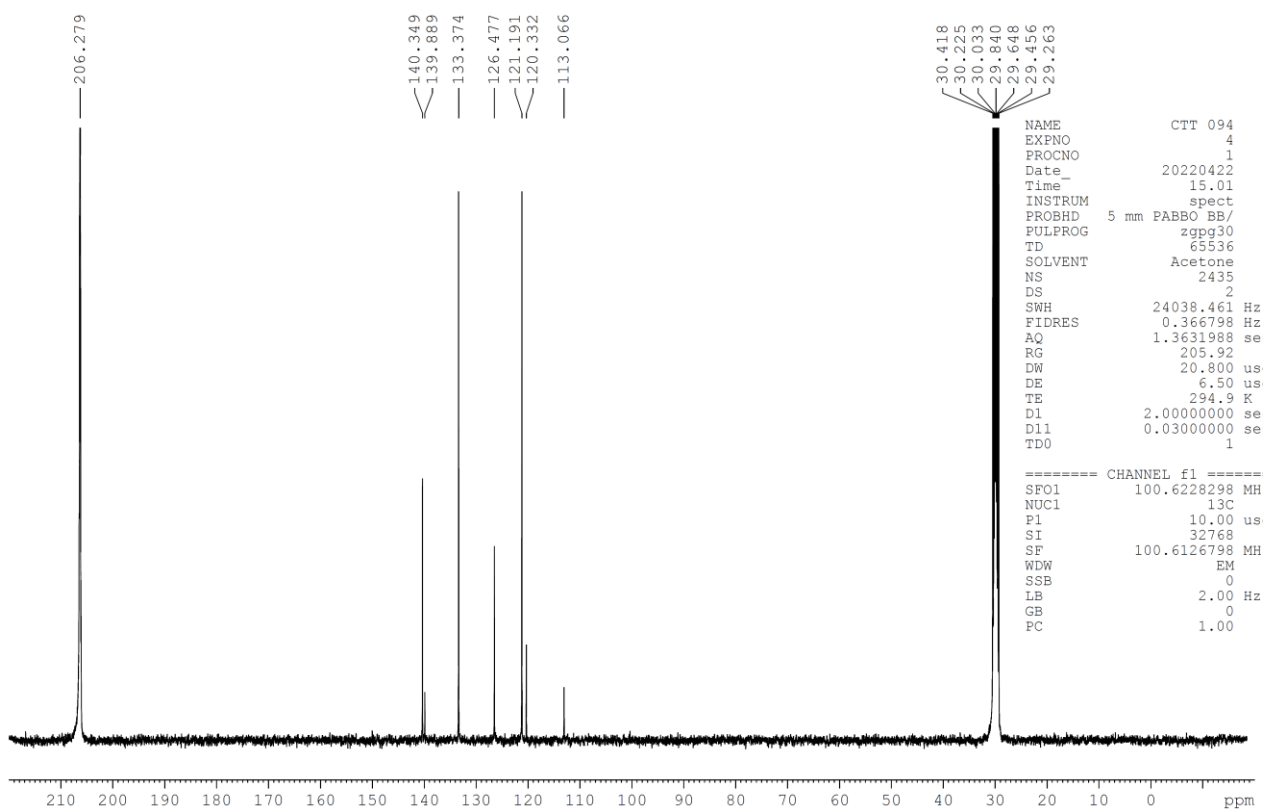

4-(4-chloro-1H-pyrazol-1-yl)benzaldehyde **1j**

<sup>1</sup>H, CDCl<sub>3</sub>

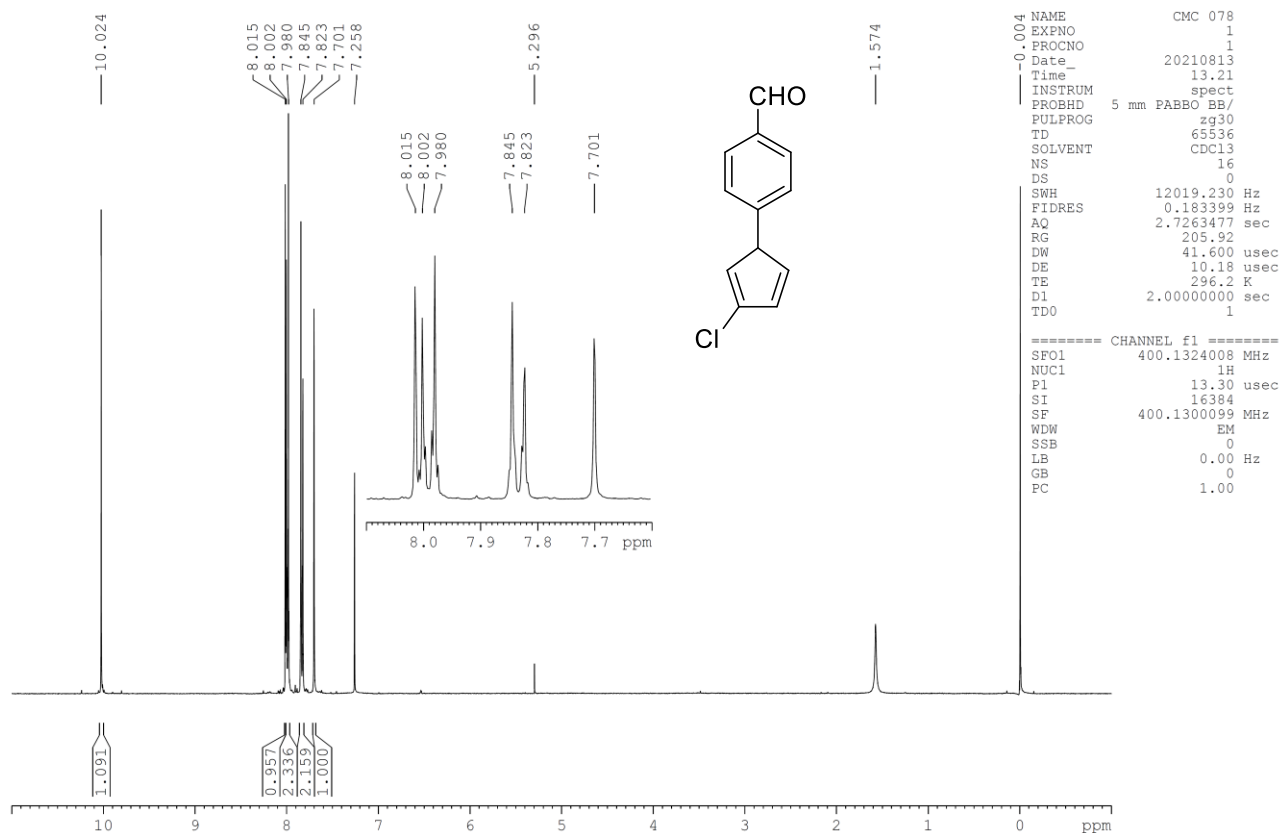

<sup>13</sup>C{<sup>1</sup>H}, CDCl<sub>3</sub>

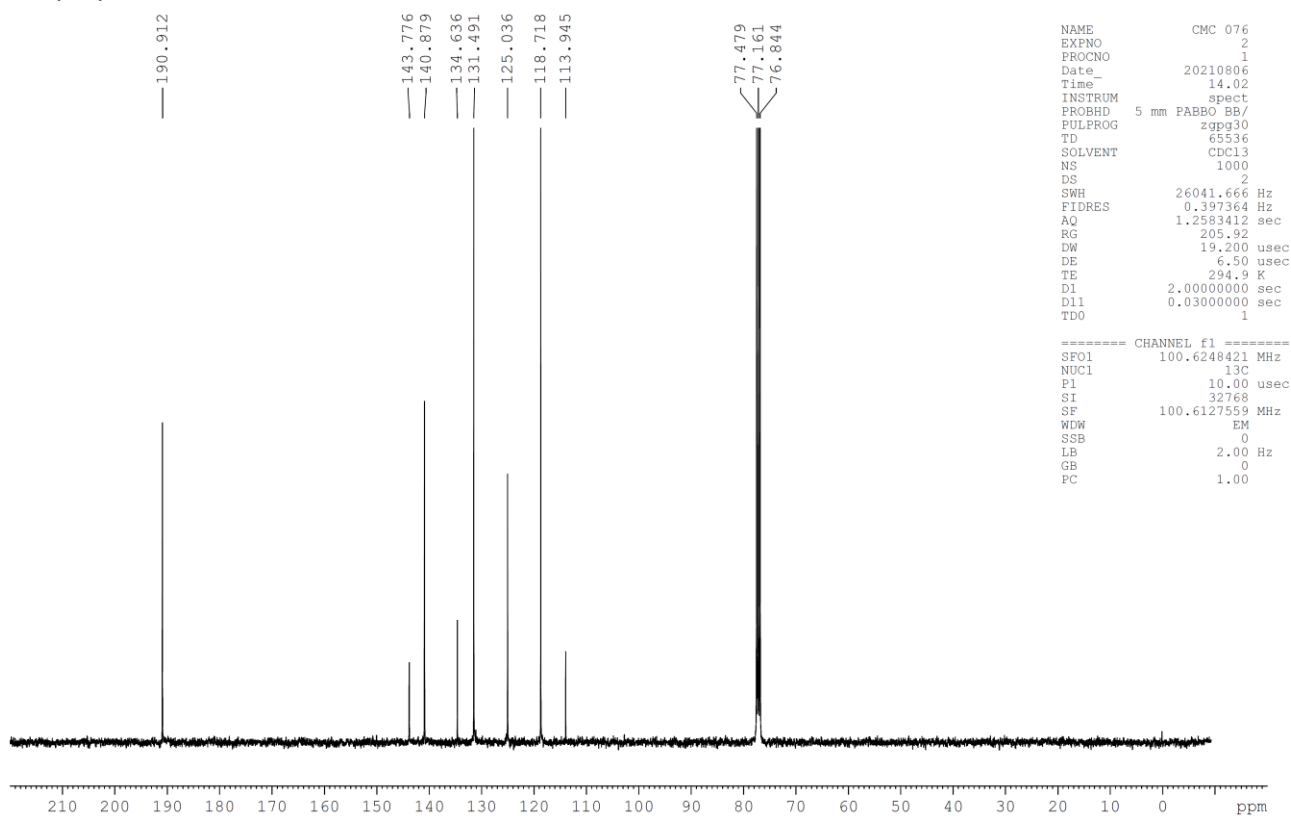



4-(4-chloro-1H-pyrazol-1-yl)benzotrile **1k**

<sup>1</sup>H, CDCl<sub>3</sub>

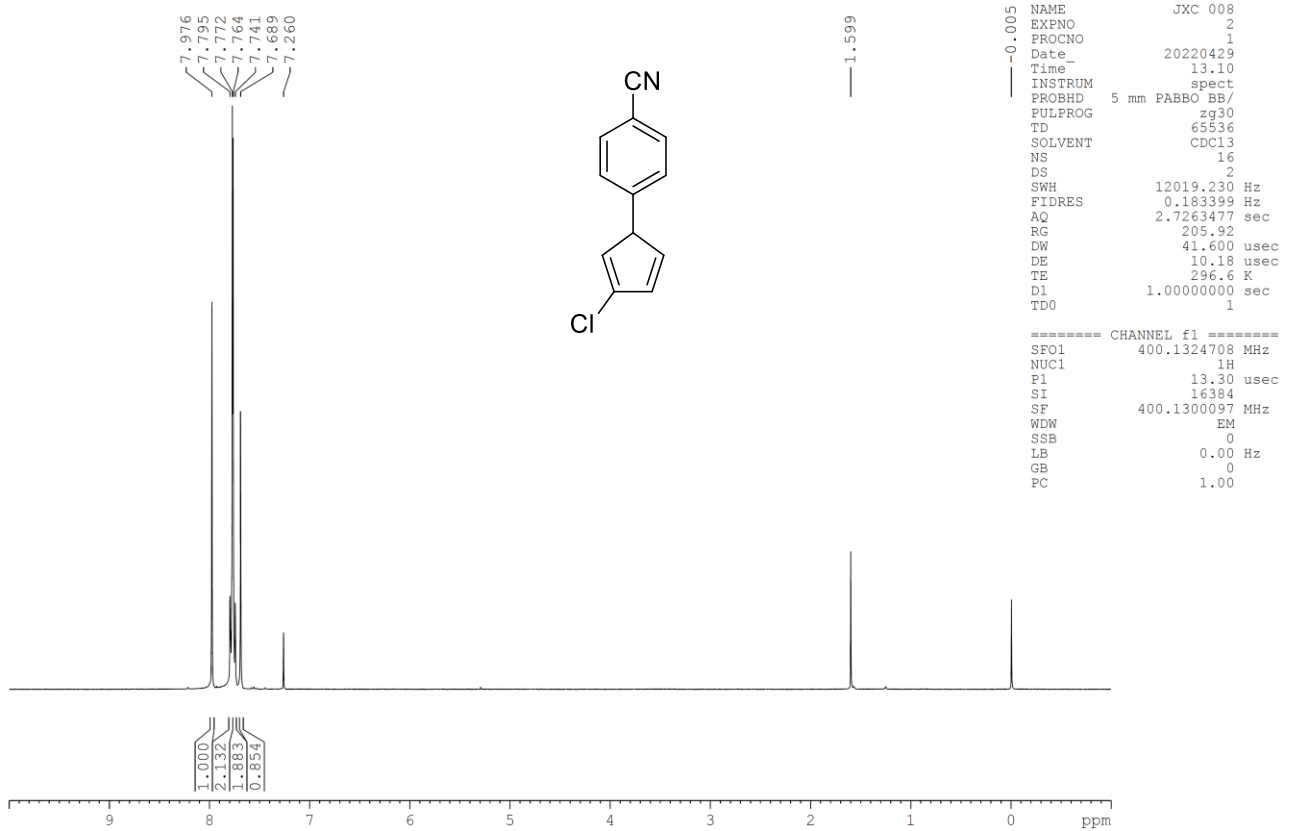

<sup>13</sup>C {<sup>1</sup>H}, CDCl<sub>3</sub>

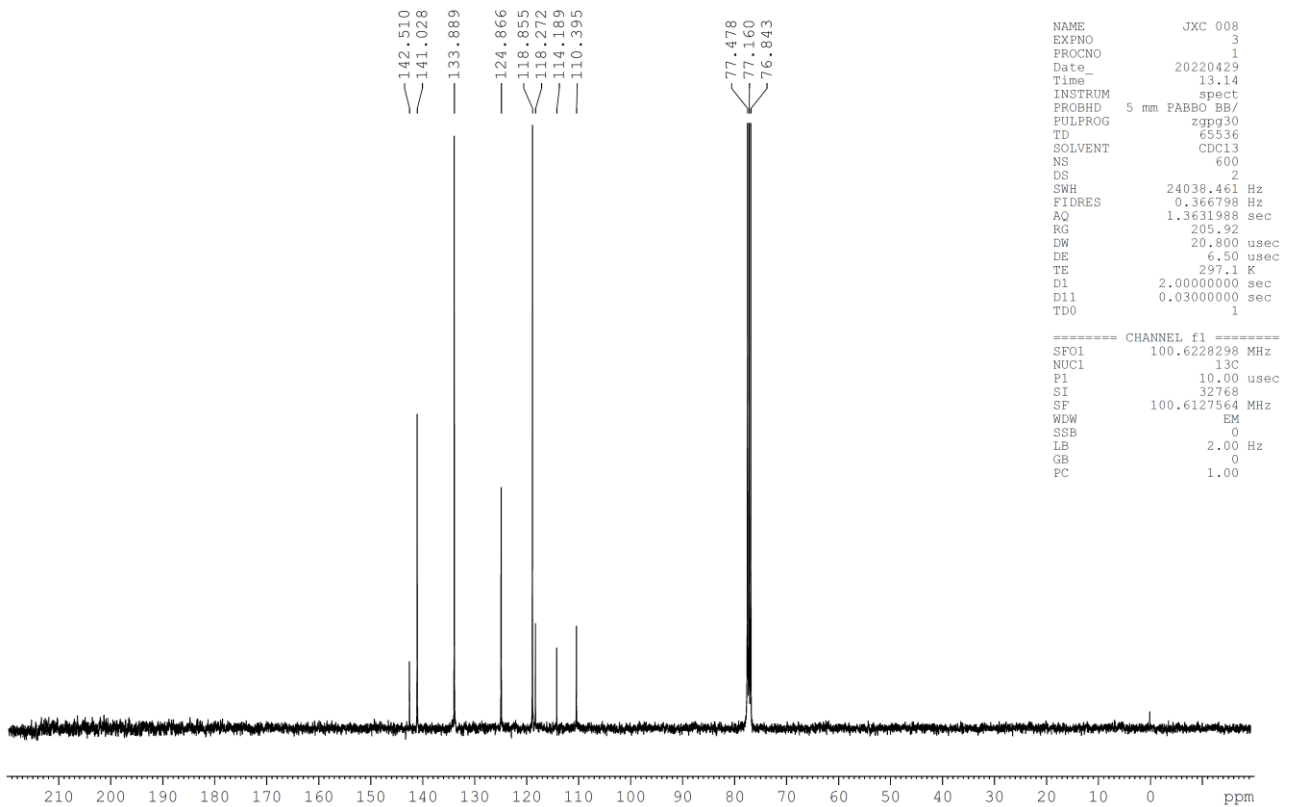

4-chloro-1-(4-nitrophenyl)-1H-pyrazole **11**

<sup>1</sup>H, CDCl<sub>3</sub>

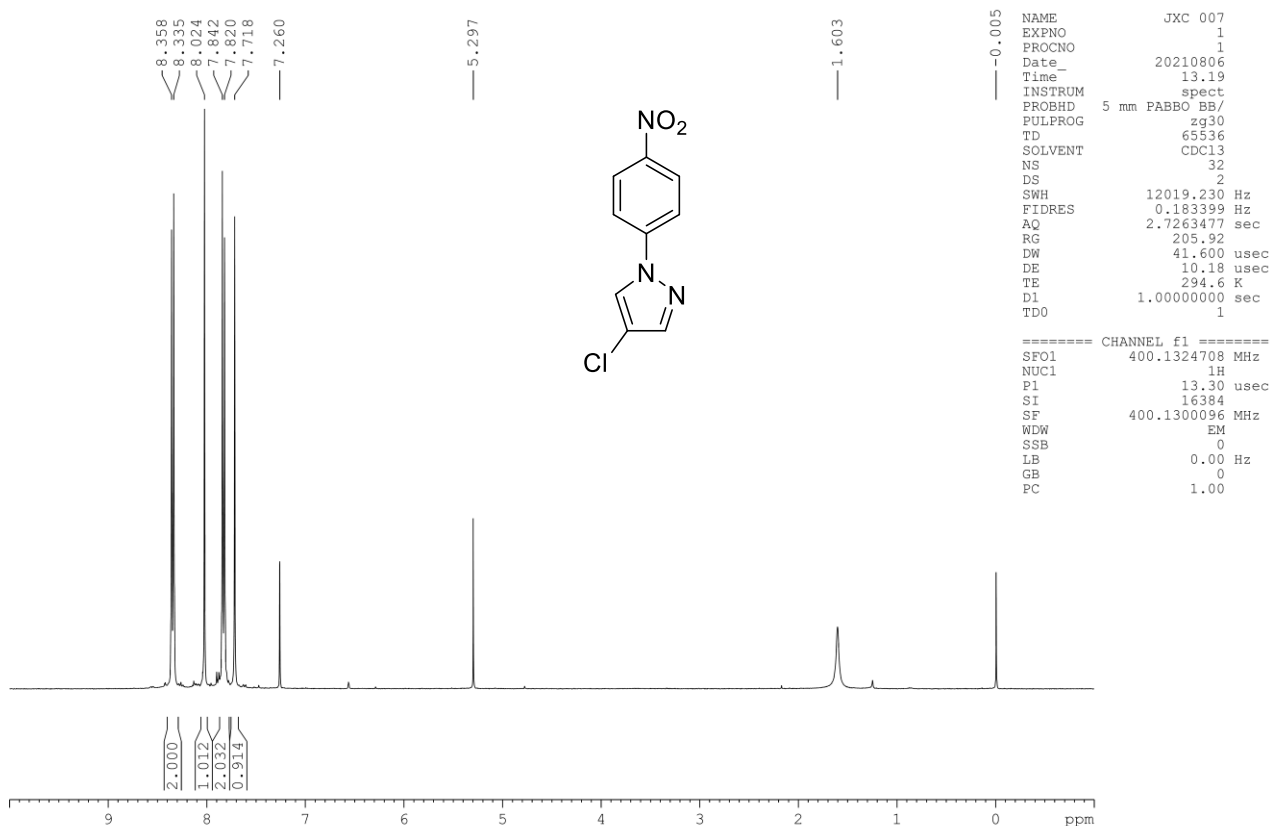

<sup>13</sup>C {<sup>1</sup>H}, CDCl<sub>3</sub>

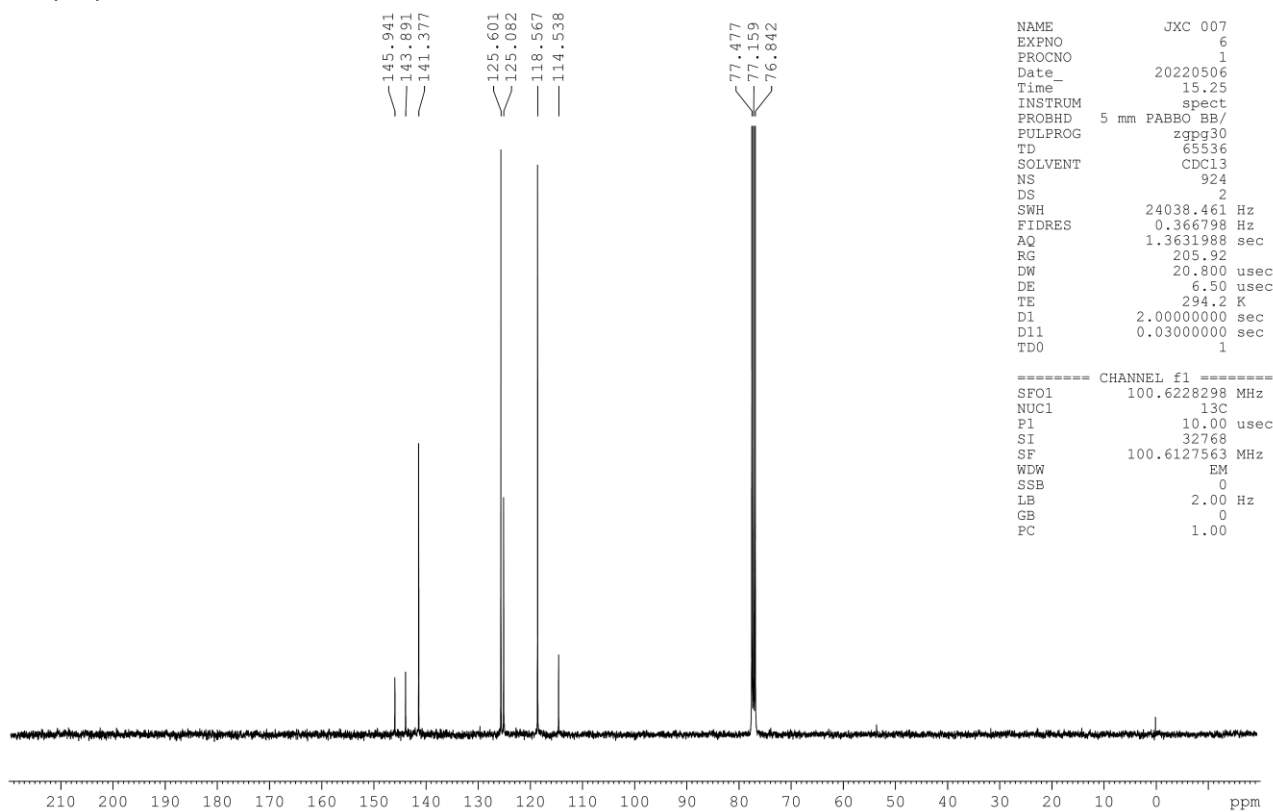

2-(4-chloro-1H-pyrazol-1-yl)pyridine **1m**

<sup>1</sup>H, CDCl<sub>3</sub>

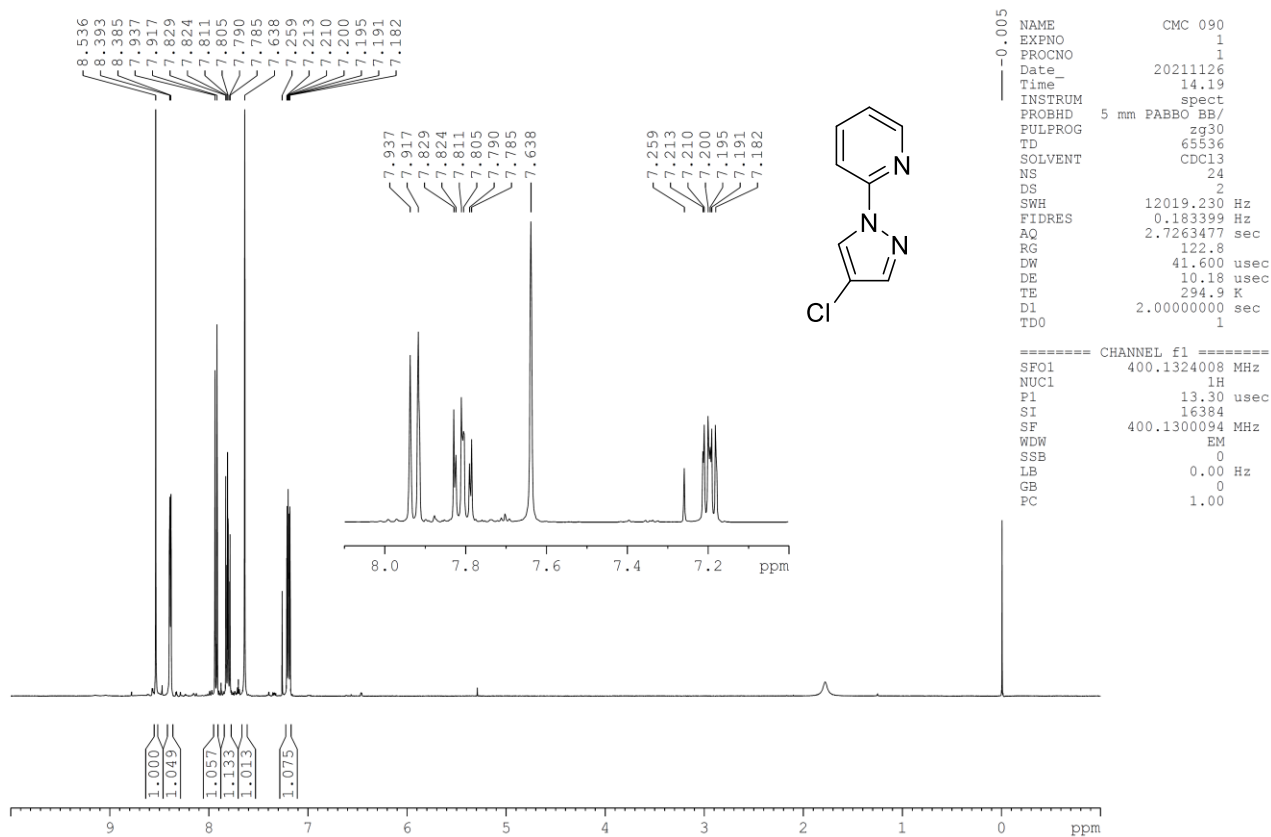

<sup>13</sup>C{<sup>1</sup>H}, CDCl<sub>3</sub>

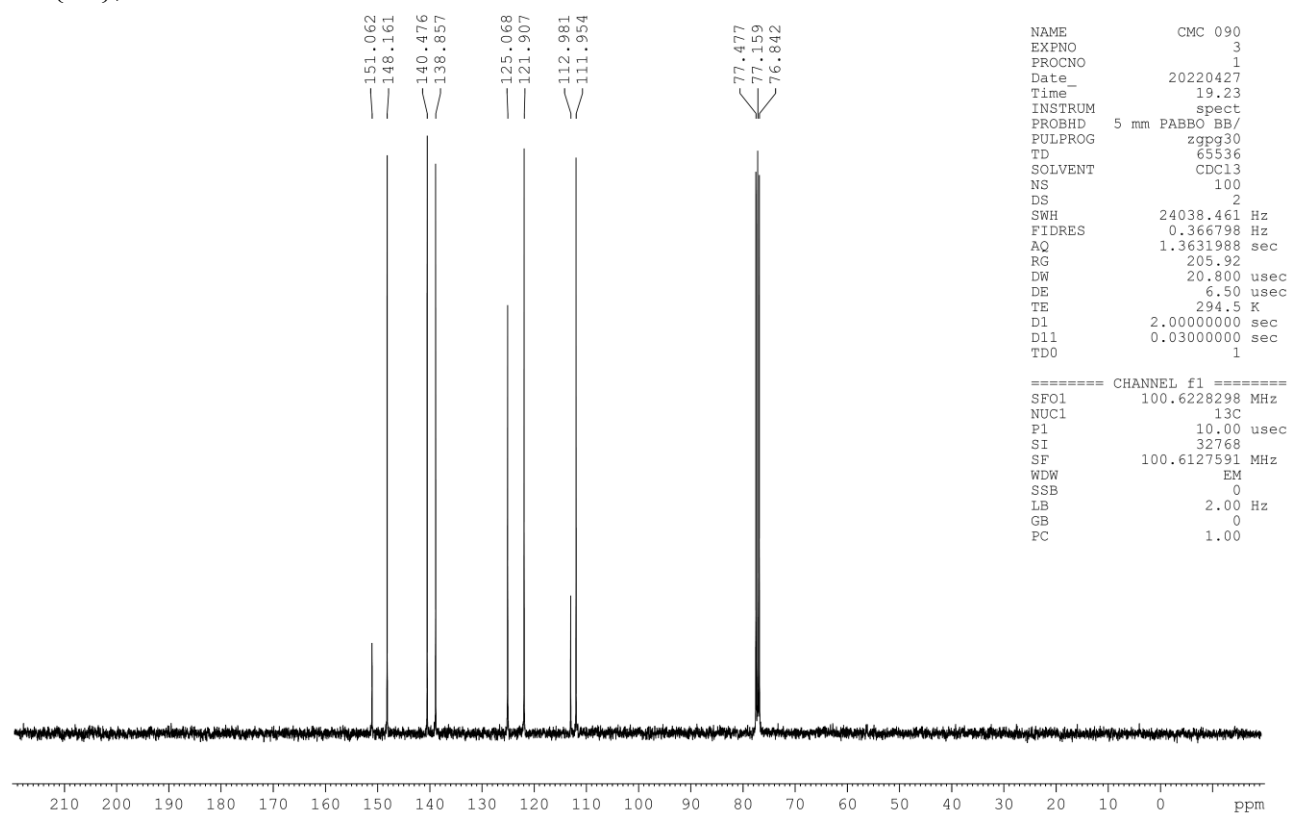

4-chloro-celecoxib **1n**

$^1\text{H}$ ,  $\text{CDCl}_3$

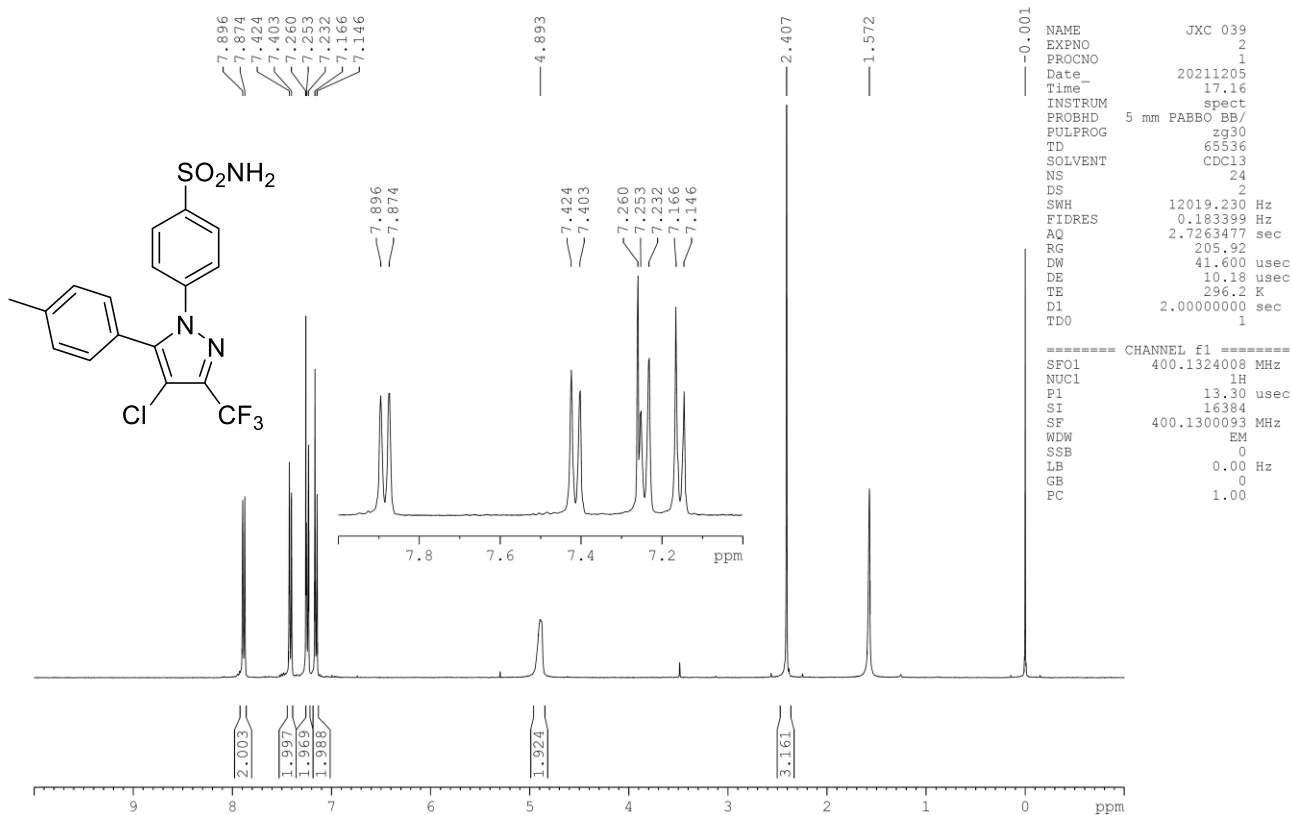

$^{13}\text{C}\{^1\text{H}\}$ ,  $\text{CDCl}_3$

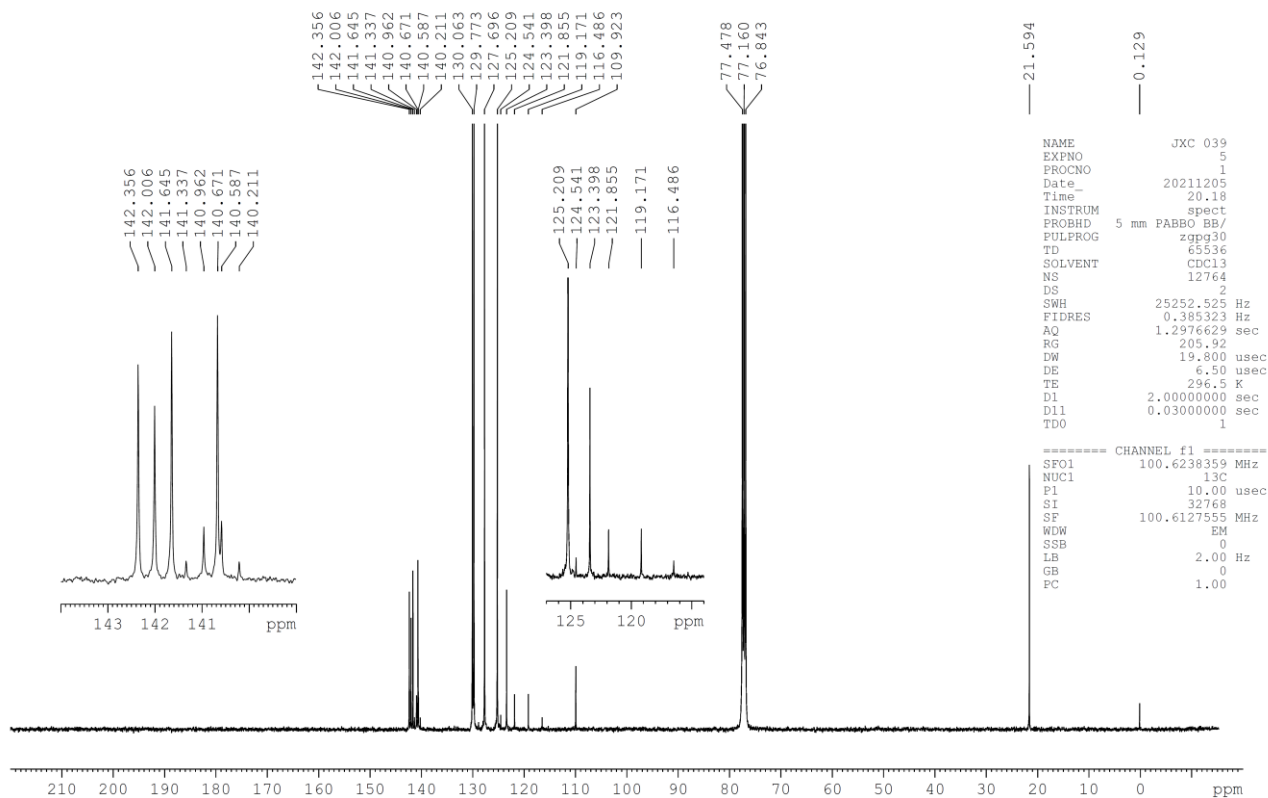

$^{19}\text{F}\{^1\text{H}\}$ ,  $\text{CDCl}_3$

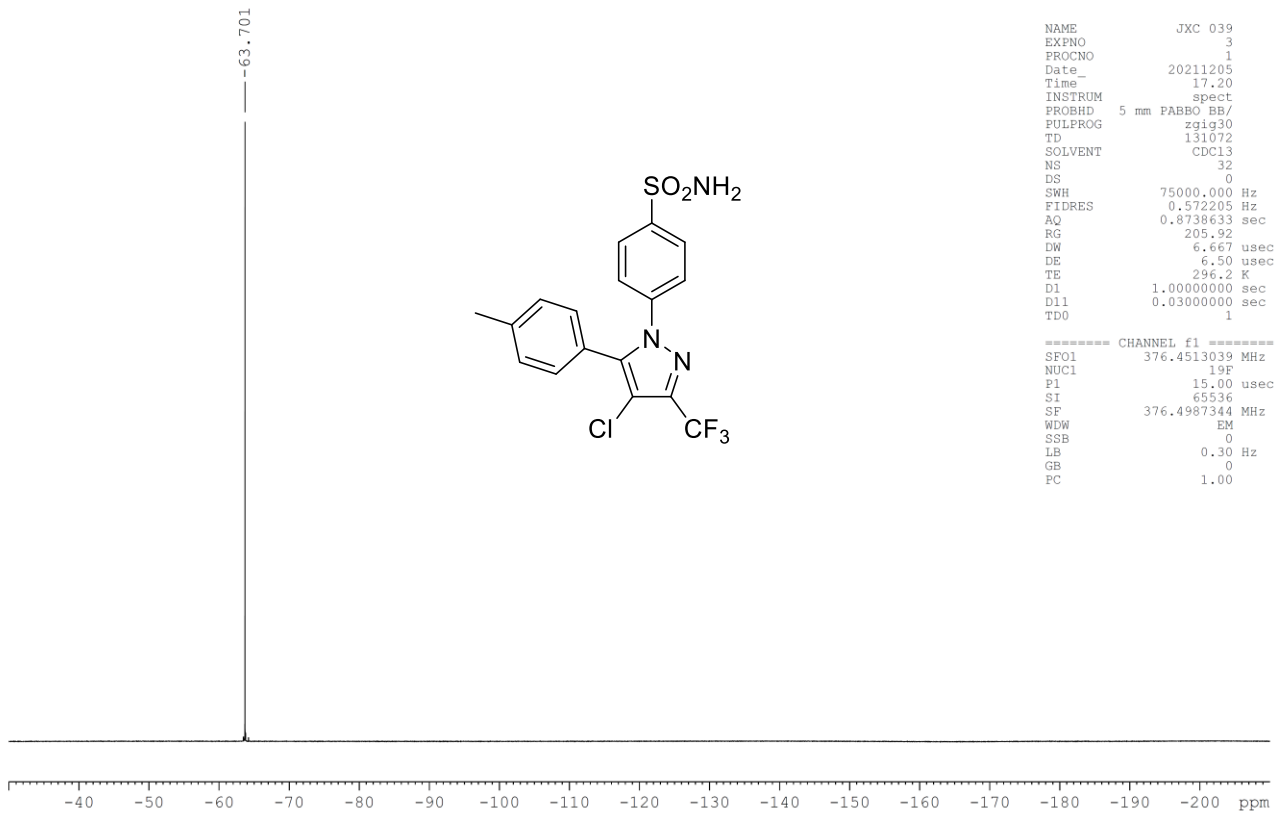

## HRMS Spectra

| No. | HRMS Spectra                                                              | Page |
|-----|---------------------------------------------------------------------------|------|
| 1   | 4-Chloro-3,5-dimethylpyrazole <b>1a</b>                                   | S39  |
| 2   | 4-Chloropyrazole <b>1b</b>                                                | S40  |
| 3   | 4-Chloro-3,5-diphenylpyrazole <b>1c</b>                                   | S41  |
| 4   | 4-Chloro-3,5-dimethyl-1H-pyrazole-1-carboxamide <b>1d</b>                 | S42  |
| 5   | 4-Chloro-1-(tetrahydro-2H-pyran-2-yl)-1H-pyrazole <b>1e</b>               | S43  |
| 6   | 4-Chloro-3,5-dimethyl-1-phenyl-1H-pyrazole <b>1f</b>                      | S44  |
| 7   | Di-chlorinated side product of 3,5-dimethyl-1-phenylpyrazole <b>1f-2</b>  | S45  |
| 8   | Tri-chlorinated side product of 3,5-dimethyl-1-phenylpyrazole <b>1f-3</b> | S46  |
| 9   | 4-Chloro-1-phenylpyrazole <b>1g</b>                                       | S47  |
| 10  | 4-Chloro-1-(4-methoxyphenyl)-1H-pyrazole <b>1h</b>                        | S48  |
| 11  | 1-(4-Bromophenyl)-4-chloro-1H-pyrazole <b>1i</b>                          | S49  |
| 12  | 4-(4-chloro-1H-pyrazol-1-yl)benzaldehyde <b>1j</b>                        | S50  |
| 13  | 4-(4-chloro-1H-pyrazol-1-yl)benzotrile <b>1k</b>                          | S51  |
| 14  | 4-chloro-1-(4-nitrophenyl)-1H-pyrazole <b>1l</b>                          | S52  |
| 15  | 2-(4-chloro-1H-pyrazol-1-yl)pyridine <b>1m</b>                            | S53  |
| 16  | 4-chloro-celecoxib <b>1n</b>                                              | S54  |

4-Chloro-3,5-dimethylpyrazole **1a**

Display Report

Analysis Info

|               |                                                               |                  |                     |               |
|---------------|---------------------------------------------------------------|------------------|---------------------|---------------|
| Analysis Name | D:\Data\nctu service\data\2022\20220304\CMC046_GA4_01_28933.d | Acquisition Date | 3/4/2022 2:50:53 PM |               |
| Method        | Small molecule.m                                              | Operator         | NCTU                |               |
| Sample Name   | CMC046                                                        | Instrument       | impact HD           | 1819696.00164 |
| Comment       |                                                               |                  |                     |               |

Acquisition Parameter

|             |          |                      |          |                  |           |
|-------------|----------|----------------------|----------|------------------|-----------|
| Source Type | ESI      | Ion Polarity         | Positive | Set Nebulizer    | 1.0 Bar   |
| Focus       | Active   | Set Capillary        | 4500 V   | Set Dry Heater   | 200 °C    |
| Scan Begin  | 50 m/z   | Set End Plate Offset | -500 V   | Set Dry Gas      | 6.0 l/min |
| Scan End    | 1500 m/z | Set Charging Voltage | 2000 V   | Set Divert Valve | Waste     |
|             |          | Set Corona           | 0 nA     | Set APCI Heater  | 0 °C      |

| Meas. m/z | # | Ion Formula | m/z      | err [ppm] | mSigma | # Sigma | Score  | rdb | e <sup>-</sup> Conf | N-Rule | Adduct |
|-----------|---|-------------|----------|-----------|--------|---------|--------|-----|---------------------|--------|--------|
| 131.0371  | 1 | C5H8ClN2    | 131.0371 | 0.4       | 9.2    | 1       | 100.00 | 2.5 | even                | ok     | M+H    |

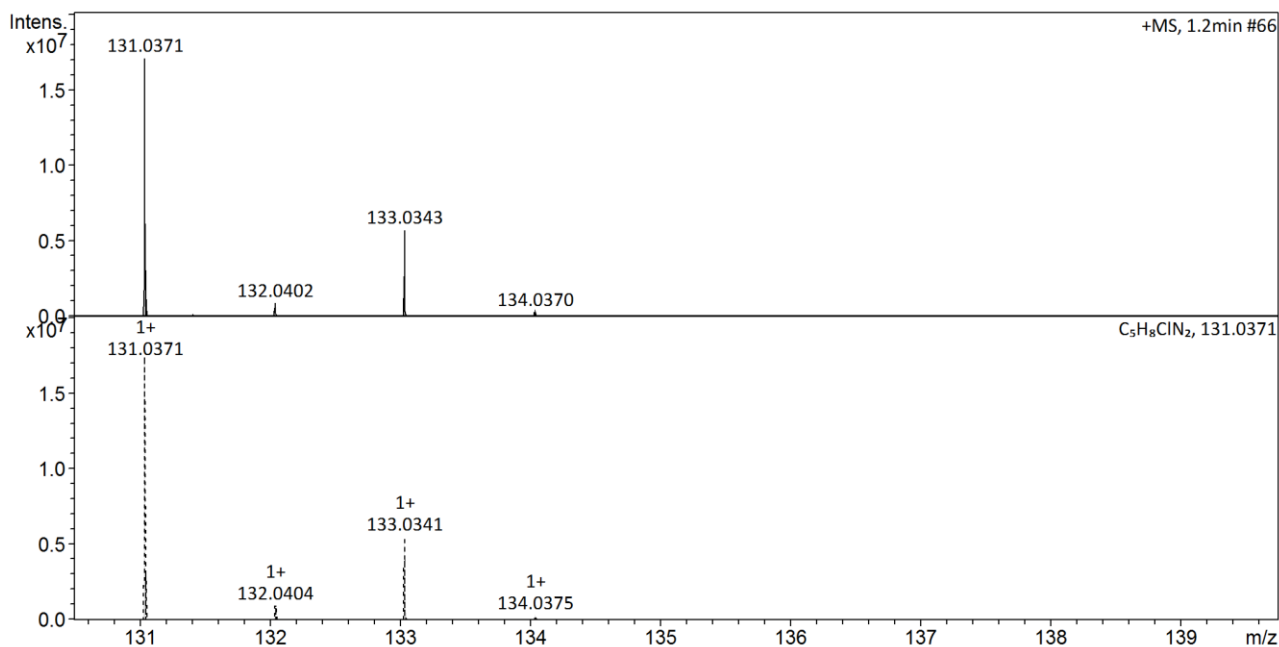

# 4-Chloropyrazole 1b

## Display Report

### Analysis Info

|               |                                                               |                  |                     |               |
|---------------|---------------------------------------------------------------|------------------|---------------------|---------------|
| Analysis Name | D:\Data\nctu service\data\2022\20220304\JXC013_GC3_01_28948.d | Acquisition Date | 3/4/2022 3:55:31 PM |               |
| Method        | Small molecule.m                                              | Operator         | NCTU                |               |
| Sample Name   | JXC013                                                        | Instrument       | impact HD           | 1819696.00164 |
| Comment       |                                                               |                  |                     |               |

### Acquisition Parameter

|             |          |                      |          |                  |           |
|-------------|----------|----------------------|----------|------------------|-----------|
| Source Type | ESI      | Ion Polarity         | Positive | Set Nebulizer    | 1.0 Bar   |
| Focus       | Active   | Set Capillary        | 4500 V   | Set Dry Heater   | 200 °C    |
| Scan Begin  | 50 m/z   | Set End Plate Offset | -500 V   | Set Dry Gas      | 6.0 l/min |
| Scan End    | 1500 m/z | Set Charging Voltage | 2000 V   | Set Divert Valve | Waste     |
|             |          | Set Corona           | 0 nA     | Set APCI Heater  | 0 °C      |

| Meas. m/z | # | Ion Formula                                    | m/z      | err [ppm] | mSigma | # Sigma | Score  | rdb | e <sup>-</sup> Conf | N-Rule | Adduct |
|-----------|---|------------------------------------------------|----------|-----------|--------|---------|--------|-----|---------------------|--------|--------|
| 103.0058  | 1 | C <sub>3</sub> H <sub>4</sub> ClN <sub>2</sub> | 103.0058 | -0.5      | 27.2   | 1       | 100.00 | 2.5 | even                | ok     | M+H    |

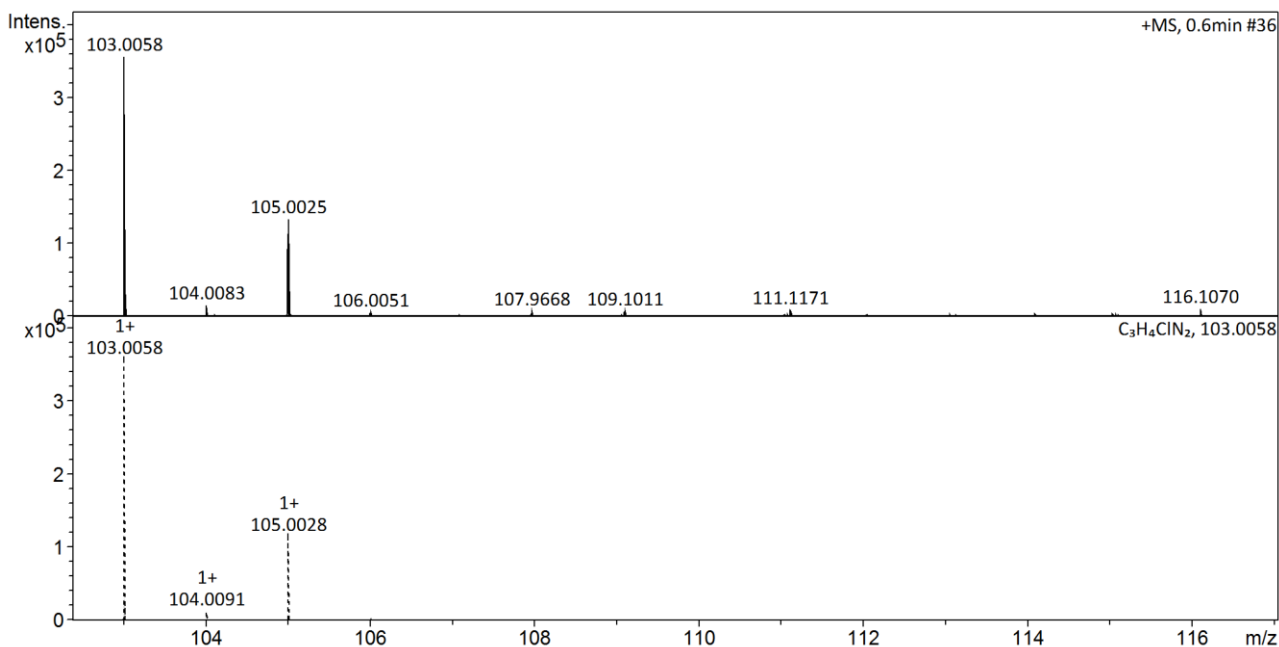



4-Chloro-3,5-diphenylpyrazole 1c

Display Report

Analysis Info

|               |                                                               |                  |                     |               |
|---------------|---------------------------------------------------------------|------------------|---------------------|---------------|
| Analysis Name | D:\Data\nctu service\data\2022\20220304\CMC053_GA5_01_28934.d | Acquisition Date | 3/4/2022 2:55:15 PM |               |
| Method        | Small molecule.m                                              | Operator         | NCTU                |               |
| Sample Name   | CMC053                                                        | Instrument       | impact HD           | 1819696.00164 |
| Comment       |                                                               |                  |                     |               |

Acquisition Parameter

|             |          |                      |          |                  |           |
|-------------|----------|----------------------|----------|------------------|-----------|
| Source Type | ESI      | Ion Polarity         | Positive | Set Nebulizer    | 1.0 Bar   |
| Focus       | Active   | Set Capillary        | 4500 V   | Set Dry Heater   | 200 °C    |
| Scan Begin  | 50 m/z   | Set End Plate Offset | -500 V   | Set Dry Gas      | 6.0 l/min |
| Scan End    | 1500 m/z | Set Charging Voltage | 2000 V   | Set Divert Valve | Waste     |
|             |          | Set Corona           | 0 nA     | Set APCI Heater  | 0 °C      |

| Meas. m/z | # | Ion Formula                                      | m/z      | err [ppm] | mSigma | # Sigma | Score  | rdb  | e <sup>-</sup> Conf | N-Rule | Adduct |
|-----------|---|--------------------------------------------------|----------|-----------|--------|---------|--------|------|---------------------|--------|--------|
| 255.0684  | 1 | C <sub>15</sub> H <sub>12</sub> ClN <sub>2</sub> | 255.0684 | 0.3       | 12.1   | 1       | 100.00 | 10.5 | even                | ok     | M+H    |

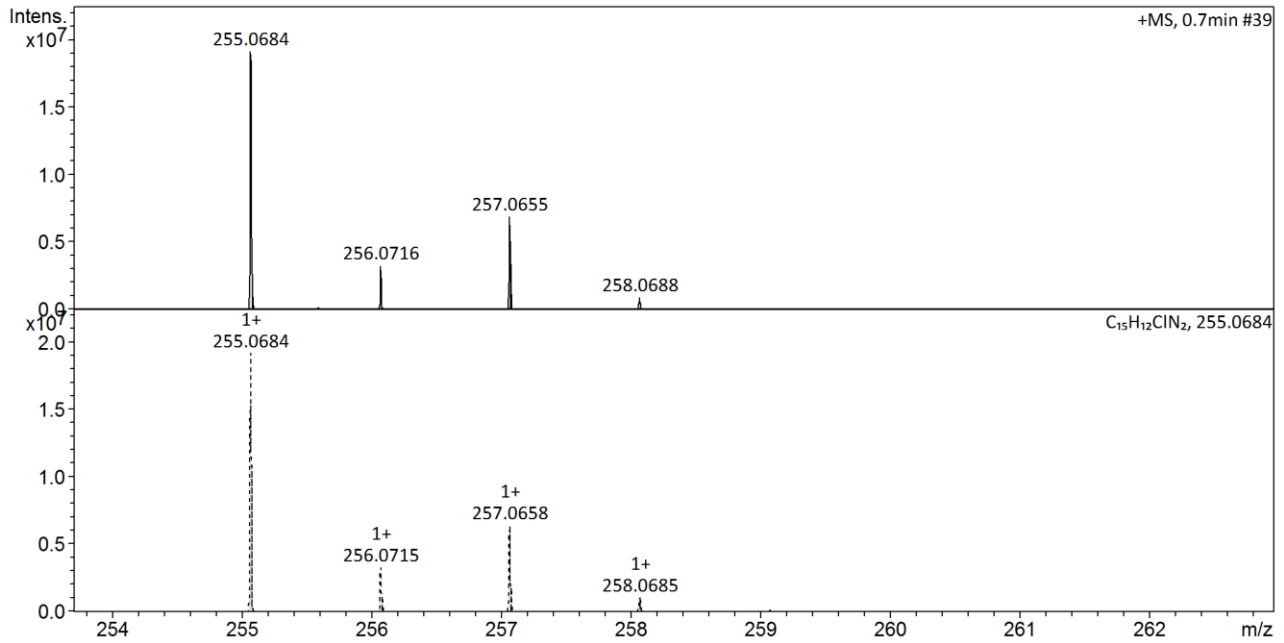

4-Chloro-3,5-dimethyl-1H-pyrazole-1-carboxamide **1d**

Display Report

Analysis Info

|               |                                                               |                  |                       |               |
|---------------|---------------------------------------------------------------|------------------|-----------------------|---------------|
| Analysis Name | D:\Data\nctu service\data\2022\20221127\CMC056_GB3_01_33255.d | Acquisition Date | 11/27/2022 3:37:14 PM |               |
| Method        | Small molecule.m                                              | Operator         | NCTU                  |               |
| Sample Name   | CMC056                                                        | Instrument       | impact HD             | 1819696.00164 |
| Comment       |                                                               |                  |                       |               |

Acquisition Parameter

|             |          |                      |          |                  |           |
|-------------|----------|----------------------|----------|------------------|-----------|
| Source Type | ESI      | Ion Polarity         | Positive | Set Nebulizer    | 1.0 Bar   |
| Focus       | Active   | Set Capillary        | 4500 V   | Set Dry Heater   | 200 °C    |
| Scan Begin  | 50 m/z   | Set End Plate Offset | -500 V   | Set Dry Gas      | 6.0 l/min |
| Scan End    | 1500 m/z | Set Charging Voltage | 2000 V   | Set Divert Valve | Waste     |
|             |          | Set Corona           | 0 nA     | Set APCI Heater  | 0 °C      |

| Meas. m/z | # | Ion Formula | m/z      | err [ppm] | mSigma | # Sigma | Score  | rdb | e <sup>-</sup> Conf | N-Rule | Adduct |
|-----------|---|-------------|----------|-----------|--------|---------|--------|-----|---------------------|--------|--------|
| 174.0424  | 1 | C6H9ClN3O   | 174.0429 | -2.5      | 17.0   | 1       | 100.00 | 3.5 | even                | ok     | M+H    |

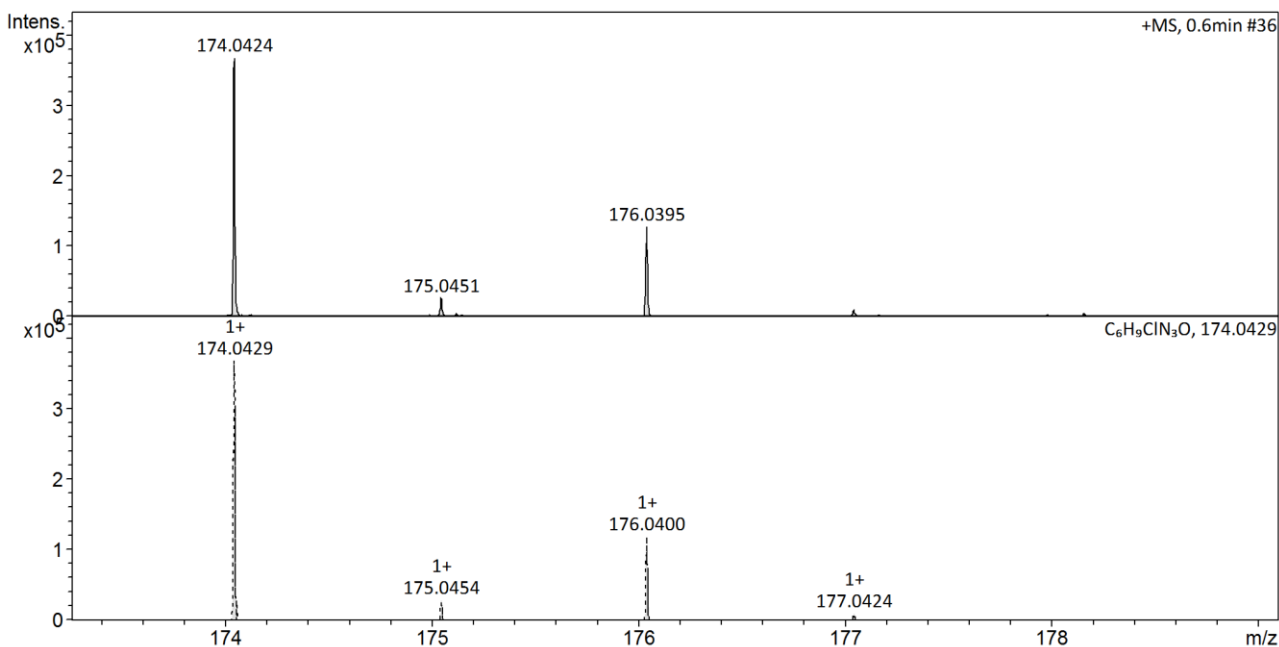

4-Chloro-1-(tetrahydro-2H-pyran-2-yl)-1H-pyrazole 1e

Display Report

Analysis Info

|               |                                                               |                  |                       |               |
|---------------|---------------------------------------------------------------|------------------|-----------------------|---------------|
| Analysis Name | D:\Data\nctu service\data\2022\20221127\CMC091_GB6_01_33258.d | Acquisition Date | 11/27/2022 3:50:20 PM |               |
| Method        | Small molecule.m                                              | Operator         | NCTU                  |               |
| Sample Name   | CMC091                                                        | Instrument       | impact HD             | 1819696.00164 |
| Comment       |                                                               |                  |                       |               |

Acquisition Parameter

|             |          |                      |          |                  |           |
|-------------|----------|----------------------|----------|------------------|-----------|
| Source Type | ESI      | Ion Polarity         | Positive | Set Nebulizer    | 1.0 Bar   |
| Focus       | Active   | Set Capillary        | 4500 V   | Set Dry Heater   | 200 °C    |
| Scan Begin  | 50 m/z   | Set End Plate Offset | -500 V   | Set Dry Gas      | 6.0 l/min |
| Scan End    | 1500 m/z | Set Charging Voltage | 2000 V   | Set Divert Valve | Waste     |
|             |          | Set Corona           | 0 nA     | Set APCI Heater  | 0 °C      |

| Meas. m/z | # | Ion Formula                                       | m/z      | err [ppm] | mSigma | # Sigma | Score  | rdb | e <sup>-</sup> Conf | N-Rule | Adduct |
|-----------|---|---------------------------------------------------|----------|-----------|--------|---------|--------|-----|---------------------|--------|--------|
| 187.0627  | 1 | C <sub>8</sub> H <sub>12</sub> ClN <sub>2</sub> O | 187.0633 | -3.0      | 4.4    | 1       | 100.00 | 3.5 | even                | ok     | M+H    |

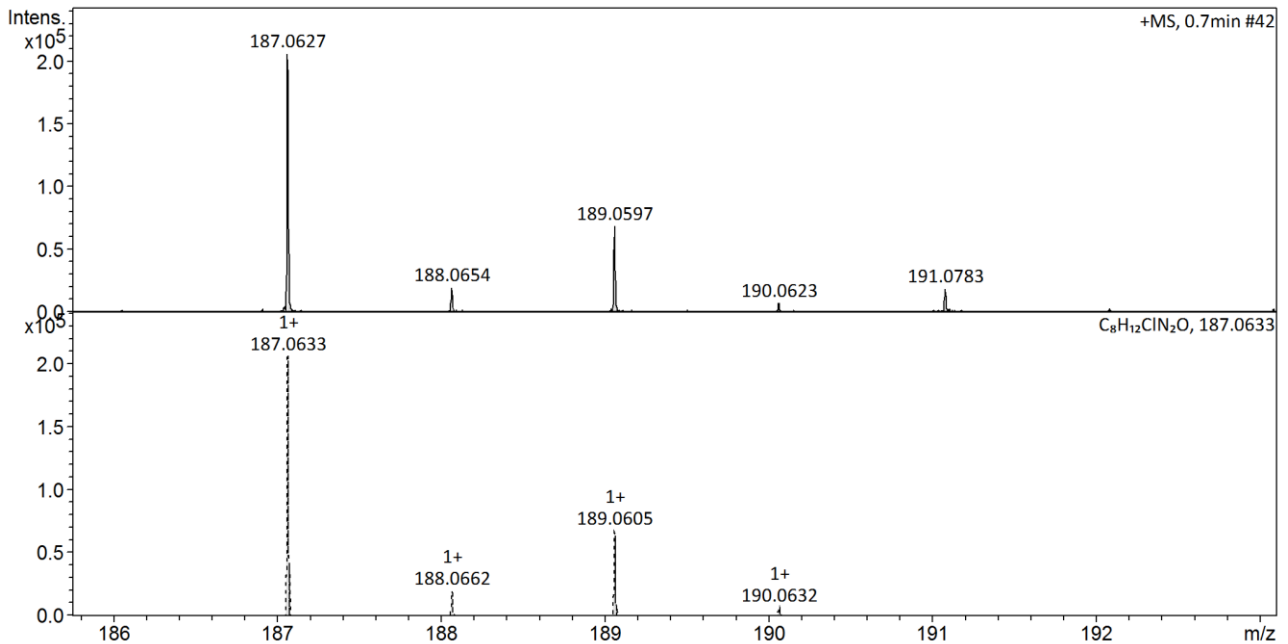

4-Chloro-3,5-dimethyl-1-phenylpyrazole 1f

Display Report

Analysis Info

|               |                                                               |                  |                     |               |
|---------------|---------------------------------------------------------------|------------------|---------------------|---------------|
| Analysis Name | D:\Data\nctu service\data\2022\20220304\CMC065_GB7_01_28944.d | Acquisition Date | 3/4/2022 3:38:18 PM |               |
| Method        | Small molecule.m                                              | Operator         | NCTU                |               |
| Sample Name   | CMC065                                                        | Instrument       | impact HD           | 1819696.00164 |
| Comment       |                                                               |                  |                     |               |

Acquisition Parameter

|             |          |                      |          |                  |           |
|-------------|----------|----------------------|----------|------------------|-----------|
| Source Type | ESI      | Ion Polarity         | Positive | Set Nebulizer    | 1.0 Bar   |
| Focus       | Active   | Set Capillary        | 4500 V   | Set Dry Heater   | 200 °C    |
| Scan Begin  | 50 m/z   | Set End Plate Offset | -500 V   | Set Dry Gas      | 6.0 l/min |
| Scan End    | 1500 m/z | Set Charging Voltage | 2000 V   | Set Divert Valve | Waste     |
|             |          | Set Corona           | 0 nA     | Set APCI Heater  | 0 °C      |

| Meas. m/z | # | Ion Formula                                      | m/z      | err [ppm] | mSigma | # Sigma | Score  | rdb | e <sup>-</sup> Conf | N-Rule | Adduct |
|-----------|---|--------------------------------------------------|----------|-----------|--------|---------|--------|-----|---------------------|--------|--------|
| 207.0686  | 1 | C <sub>11</sub> H <sub>12</sub> ClN <sub>2</sub> | 207.0684 | -1.3      | 8.8    | 1       | 100.00 | 6.5 | even                | ok     | M+H    |

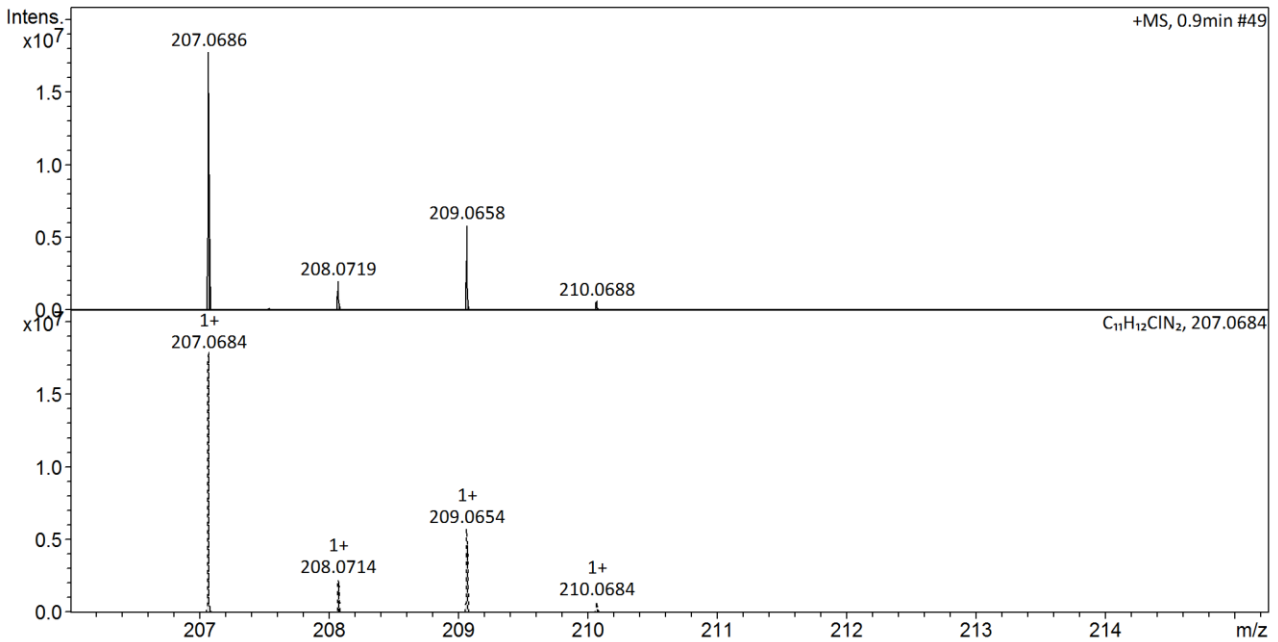

Di-chlorinated side product of 3,5-dimethyl-1-phenylpyrazole **1f-2**

## Display Report

**Analysis Info**

|               |                                                                  |                  |                         |
|---------------|------------------------------------------------------------------|------------------|-------------------------|
| Analysis Name | D:\Data\nctu service\data\2022\20220304\CMC065 F4_GB8_01_28945.d | Acquisition Date | 3/4/2022 3:42:38 PM     |
| Method        | Small molecule.m                                                 | Operator         | NCTU                    |
| Sample Name   | CMC065 F4                                                        | Instrument       | impact HD 1819696.00164 |
| Comment       |                                                                  |                  |                         |

**Acquisition Parameter**

|             |          |                      |          |                  |           |
|-------------|----------|----------------------|----------|------------------|-----------|
| Source Type | ESI      | Ion Polarity         | Positive | Set Nebulizer    | 1.0 Bar   |
| Focus       | Active   | Set Capillary        | 4500 V   | Set Dry Heater   | 200 °C    |
| Scan Begin  | 50 m/z   | Set End Plate Offset | -500 V   | Set Dry Gas      | 6.0 l/min |
| Scan End    | 1500 m/z | Set Charging Voltage | 2000 V   | Set Divert Valve | Waste     |
|             |          | Set Corona           | 0 nA     | Set APCI Heater  | 0 °C      |

| Meas. m/z | # | Ion Formula                                                    | m/z      | err [ppm] | mSigma | # Sigma | Score  | rdb | e <sup>-</sup> Conf | N-Rule | Adduct |
|-----------|---|----------------------------------------------------------------|----------|-----------|--------|---------|--------|-----|---------------------|--------|--------|
| 241.0293  | 1 | C <sub>11</sub> H <sub>11</sub> Cl <sub>2</sub> N <sub>2</sub> | 241.0294 | -0.3      | 26.6   | 1       | 100.00 | 6.5 | even                | ok     | M+H    |

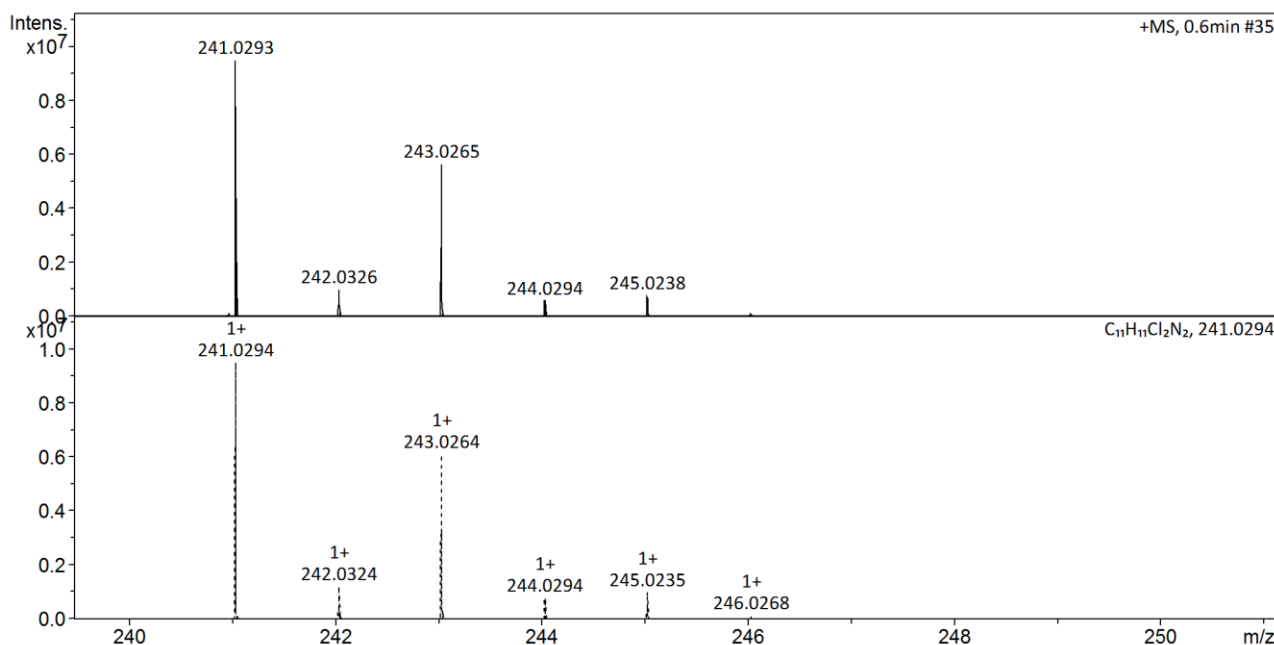

Tri-chlorinated side product of 3,5-dimethyl-1-phenylpyrazole **1f-3**

## Display Report

**Analysis Info**

|               |                                                                  |                  |                         |
|---------------|------------------------------------------------------------------|------------------|-------------------------|
| Analysis Name | D:\Data\nctu service\data\2022\20220304\CMC065 F2_GC1_01_28946.d | Acquisition Date | 3/4/2022 3:46:56 PM     |
| Method        | Small molecule.m                                                 | Operator         | NCTU                    |
| Sample Name   | CMC065 F2                                                        | Instrument       | impact HD 1819696.00164 |
| Comment       |                                                                  |                  |                         |

**Acquisition Parameter**

|             |          |                      |          |                  |           |
|-------------|----------|----------------------|----------|------------------|-----------|
| Source Type | ESI      | Ion Polarity         | Positive | Set Nebulizer    | 1.0 Bar   |
| Focus       | Active   | Set Capillary        | 4500 V   | Set Dry Heater   | 200 °C    |
| Scan Begin  | 50 m/z   | Set End Plate Offset | -500 V   | Set Dry Gas      | 6.0 l/min |
| Scan End    | 1500 m/z | Set Charging Voltage | 2000 V   | Set Divert Valve | Waste     |
|             |          | Set Corona           | 0 nA     | Set APCI Heater  | 0 °C      |

| Meas. m/z | # | Ion Formula                                                    | m/z      | err [ppm] | mSigma | # Sigma | Score  | rdb | e <sup>-</sup> Conf | N-Rule | Adduct |
|-----------|---|----------------------------------------------------------------|----------|-----------|--------|---------|--------|-----|---------------------|--------|--------|
| 274.9902  | 1 | C <sub>11</sub> H <sub>10</sub> Cl <sub>3</sub> N <sub>2</sub> | 274.9904 | -0.7      | 30.4   | 1       | 100.00 | 6.5 | even                | ok     | M+H    |

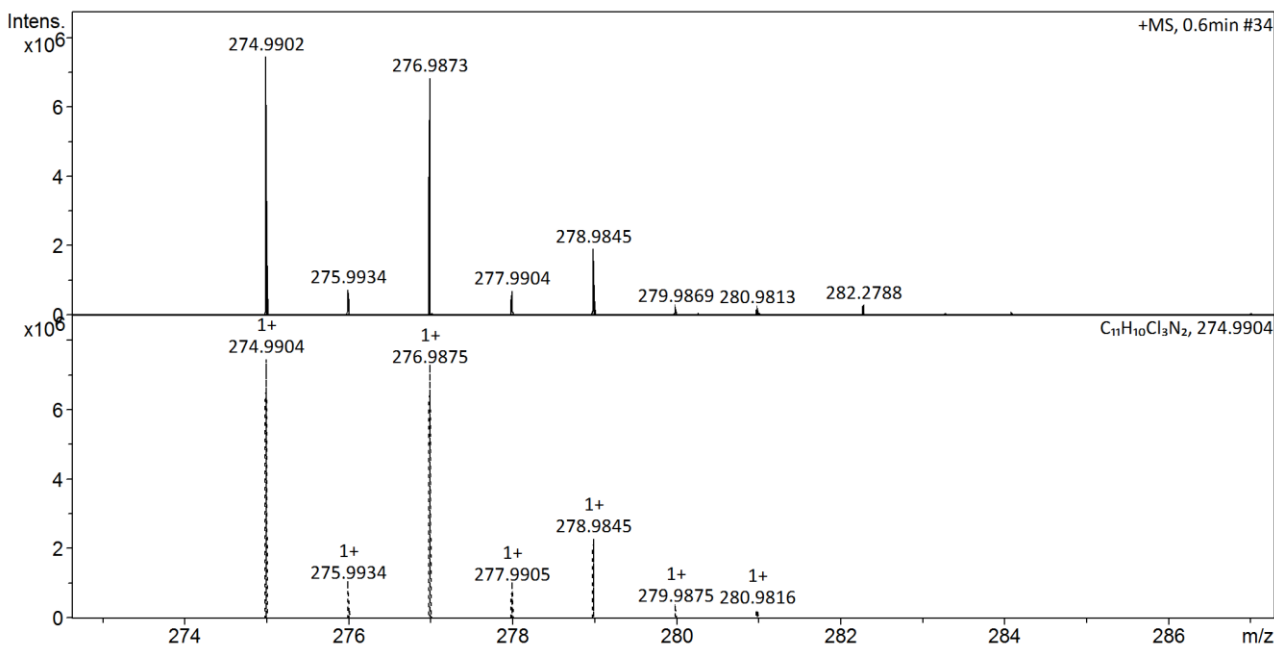

# 4-Chloro-1-phenylpyrazole 1g

## Display Report

### Analysis Info

Analysis Name D:\Data\nctu service\data\2022\20220304\JXC029\_GA7\_01\_28936.d  
Method Small molecule.m  
Sample Name JXC029  
Comment  
Acquisition Date 3/4/2022 3:03:50 PM  
Operator NCTU  
Instrument impact HD 1819696.00164

### Acquisition Parameter

Source Type ESI Ion Polarity Positive Set Nebulizer 1.0 Bar  
Focus Active Set Capillary 4500 V Set Dry Heater 200 °C  
Scan Begin 50 m/z Set End Plate Offset -500 V Set Dry Gas 6.0 l/min  
Scan End 1500 m/z Set Charging Voltage 2000 V Set Divert Valve Waste  
Set Corona 0 nA Set APCI Heater 0 °C

| Meas. m/z | # | Ion Formula                                    | m/z      | err [ppm] | mSigma | # Sigma | Score  | rdb | e <sup>-</sup> Conf | N-Rule | Adduct |
|-----------|---|------------------------------------------------|----------|-----------|--------|---------|--------|-----|---------------------|--------|--------|
| 179.0371  | 1 | C <sub>9</sub> H <sub>8</sub> ClN <sub>2</sub> | 179.0371 | -0.4      | 17.4   | 1       | 100.00 | 6.5 | even                | ok     | M+H    |

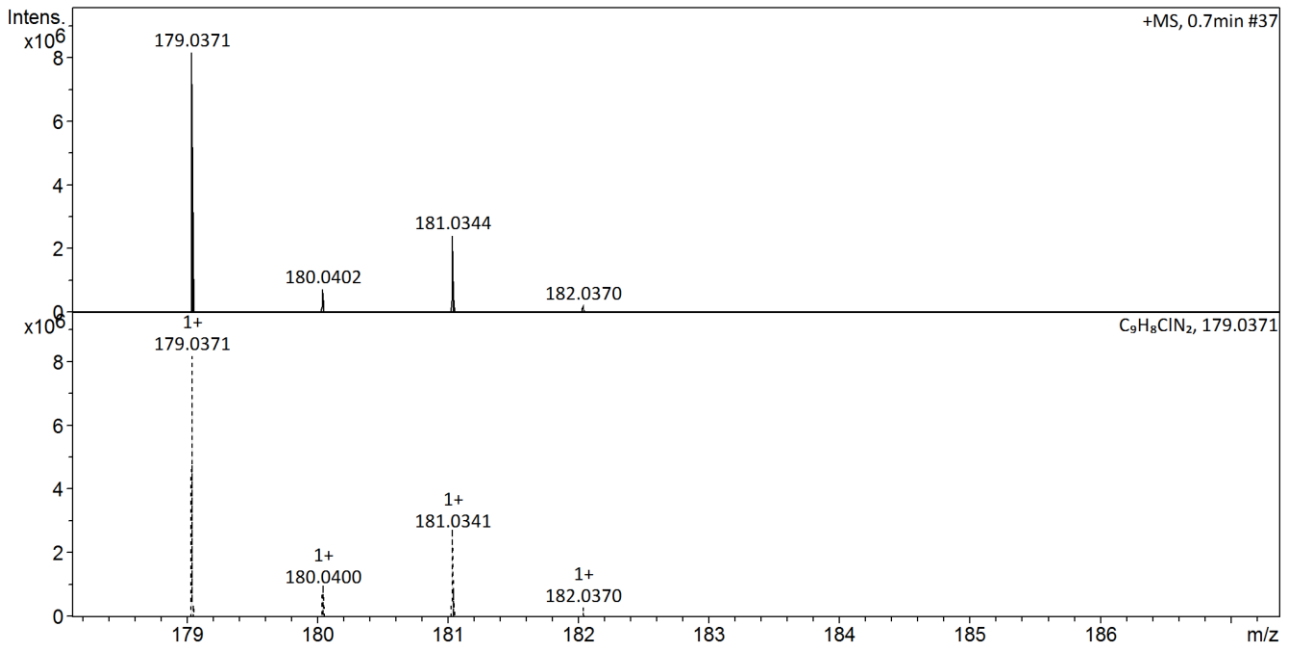

4-Chloro-1-(4-methoxyphenyl)pyrazole 1h

Display Report

Analysis Info

|               |                                                               |                  |                     |               |
|---------------|---------------------------------------------------------------|------------------|---------------------|---------------|
| Analysis Name | D:\Data\nctu service\data\2022\20220304\CMC075_GB2_01_28939.d | Acquisition Date | 3/4/2022 3:16:44 PM |               |
| Method        | Small molecule.m                                              | Operator         | NCTU                |               |
| Sample Name   | CMC075                                                        | Instrument       | impact HD           | 1819696.00164 |
| Comment       |                                                               |                  |                     |               |

Acquisition Parameter

|             |          |                      |          |                  |           |
|-------------|----------|----------------------|----------|------------------|-----------|
| Source Type | ESI      | Ion Polarity         | Positive | Set Nebulizer    | 1.0 Bar   |
| Focus       | Active   | Set Capillary        | 4500 V   | Set Dry Heater   | 200 °C    |
| Scan Begin  | 50 m/z   | Set End Plate Offset | -500 V   | Set Dry Gas      | 6.0 l/min |
| Scan End    | 1500 m/z | Set Charging Voltage | 2000 V   | Set Divert Valve | Waste     |
|             |          | Set Corona           | 0 nA     | Set APCI Heater  | 0 °C      |

| Meas. m/z | # | Ion Formula                                        | m/z      | err [ppm] | mSigma | # Sigma | Score  | rdb | e <sup>-</sup> Conf | N-Rule | Adduct |
|-----------|---|----------------------------------------------------|----------|-----------|--------|---------|--------|-----|---------------------|--------|--------|
| 209.0476  | 1 | C <sub>10</sub> H <sub>10</sub> ClN <sub>2</sub> O | 209.0476 | -0.1      | 9.9    | 1       | 100.00 | 6.5 | even                | ok     | M+H    |

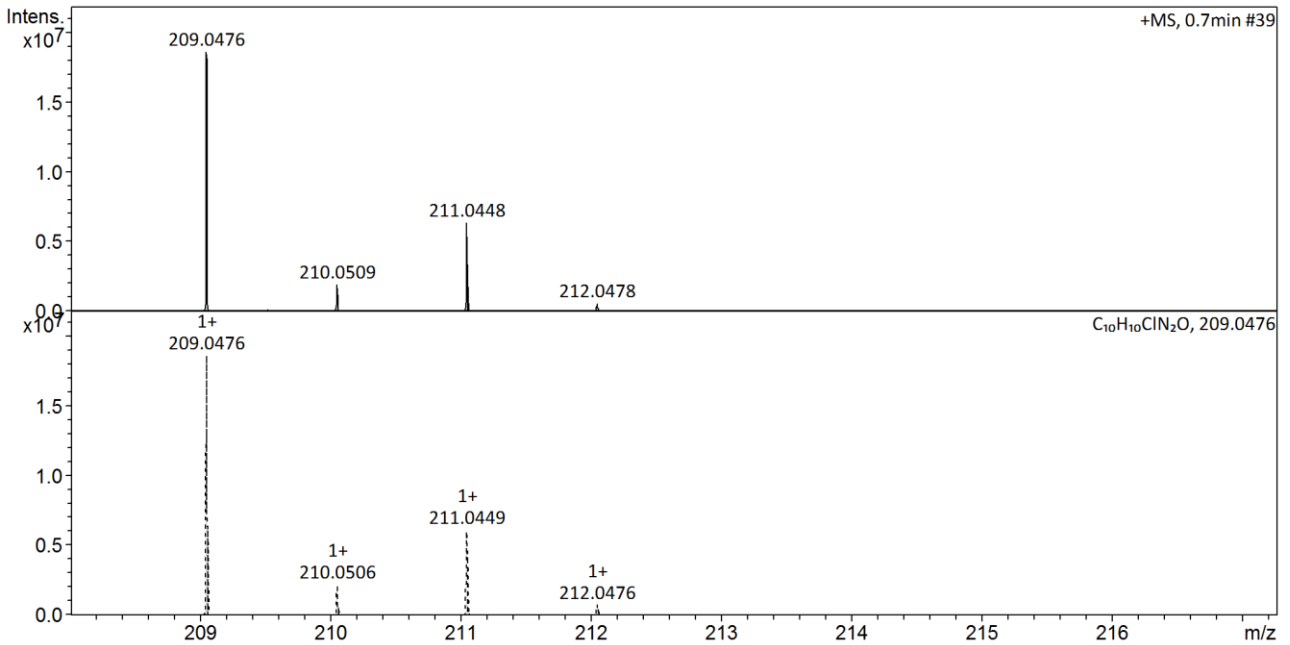



4-Chloro-1-(4-bromophenyl)pyrazole **1i**

Display Report

Analysis Info

|               |                                                               |                  |                         |
|---------------|---------------------------------------------------------------|------------------|-------------------------|
| Analysis Name | D:\Data\nctu service\data\2022\20221127\JXC023_GB4_01_33256.d | Acquisition Date | 11/27/2022 3:41:32 PM   |
| Method        | Small molecule.m                                              | Operator         | NCTU                    |
| Sample Name   | JXC023                                                        | Instrument       | impact HD 1819696.00164 |
| Comment       |                                                               |                  |                         |

Acquisition Parameter

|             |          |                      |          |                  |           |
|-------------|----------|----------------------|----------|------------------|-----------|
| Source Type | ESI      | Ion Polarity         | Positive | Set Nebulizer    | 1.0 Bar   |
| Focus       | Active   | Set Capillary        | 4500 V   | Set Dry Heater   | 200 °C    |
| Scan Begin  | 50 m/z   | Set End Plate Offset | -500 V   | Set Dry Gas      | 6.0 l/min |
| Scan End    | 1500 m/z | Set Charging Voltage | 2000 V   | Set Divert Valve | Waste     |
|             |          | Set Corona           | 0 nA     | Set APCI Heater  | 0 °C      |

| Meas. m/z | # | Ion Formula | m/z      | err [ppm] | mSigma | # Sigma | Score  | rdb | e <sup>-</sup> Conf | N-Rule | Adduct |
|-----------|---|-------------|----------|-----------|--------|---------|--------|-----|---------------------|--------|--------|
| 256.9473  | 1 | C9H7BrClN2  | 256.9476 | 1.2       | 14.8   | 1       | 100.00 | 6.5 | even                | ok     | M+H    |

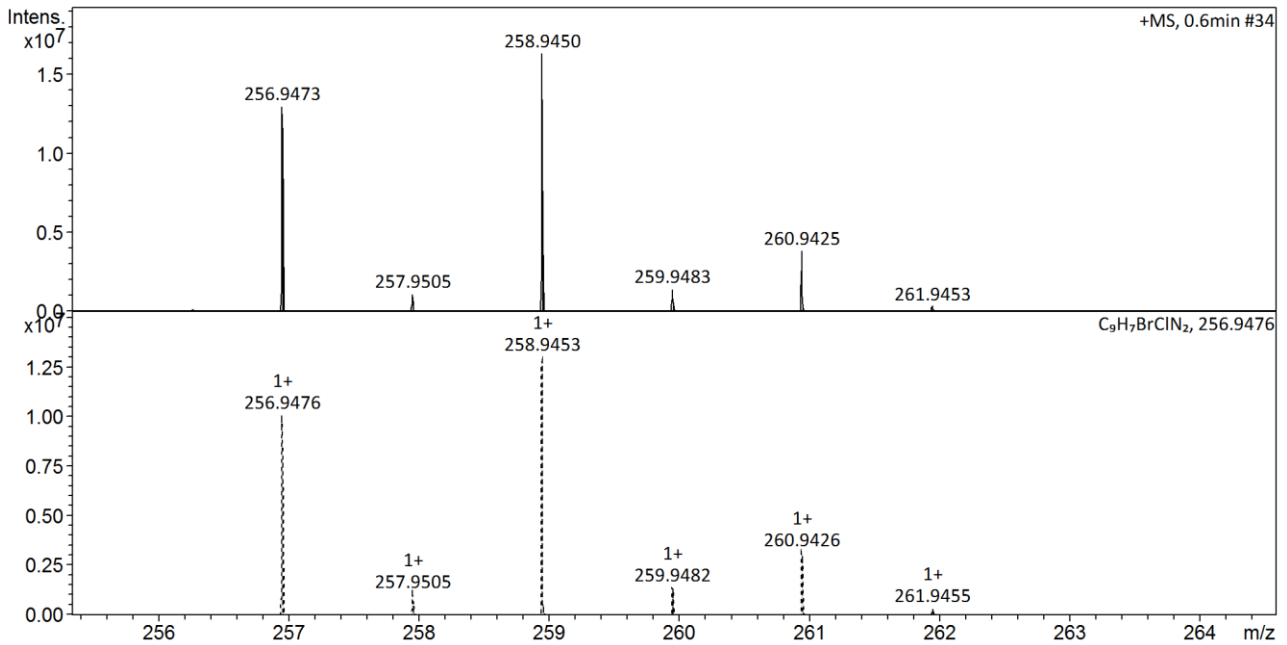

4-(4-chloro-1H-pyrazol-1-yl)benzaldehyde 1j

Display Report

Analysis Info

|               |                                                               |                  |                         |
|---------------|---------------------------------------------------------------|------------------|-------------------------|
| Analysis Name | D:\Data\nctu service\data\2022\20221127\CMC076_GB7_01_33259.d | Acquisition Date | 11/27/2022 3:54:38 PM   |
| Method        | Small molecule.m                                              | Operator         | NCTU                    |
| Sample Name   | CMC076                                                        | Instrument       | impact HD 1819696.00164 |
| Comment       |                                                               |                  |                         |

Acquisition Parameter

|             |          |                      |          |                  |           |
|-------------|----------|----------------------|----------|------------------|-----------|
| Source Type | ESI      | Ion Polarity         | Positive | Set Nebulizer    | 1.0 Bar   |
| Focus       | Active   | Set Capillary        | 4500 V   | Set Dry Heater   | 200 °C    |
| Scan Begin  | 50 m/z   | Set End Plate Offset | -500 V   | Set Dry Gas      | 6.0 l/min |
| Scan End    | 1500 m/z | Set Charging Voltage | 2000 V   | Set Divert Valve | Waste     |
|             |          | Set Corona           | 0 nA     | Set APCI Heater  | 0 °C      |

| Meas. m/z | # | Ion Formula                                       | m/z      | err [ppm] | mSigma | # Sigma | Score  | rdb | e <sup>-</sup> Conf | N-Rule | Adduct |
|-----------|---|---------------------------------------------------|----------|-----------|--------|---------|--------|-----|---------------------|--------|--------|
| 207.0316  | 1 | C <sub>10</sub> H <sub>8</sub> ClN <sub>2</sub> O | 207.0320 | -1.8      | 10.2   | 1       | 100.00 | 7.5 | even                | ok     | M+H    |

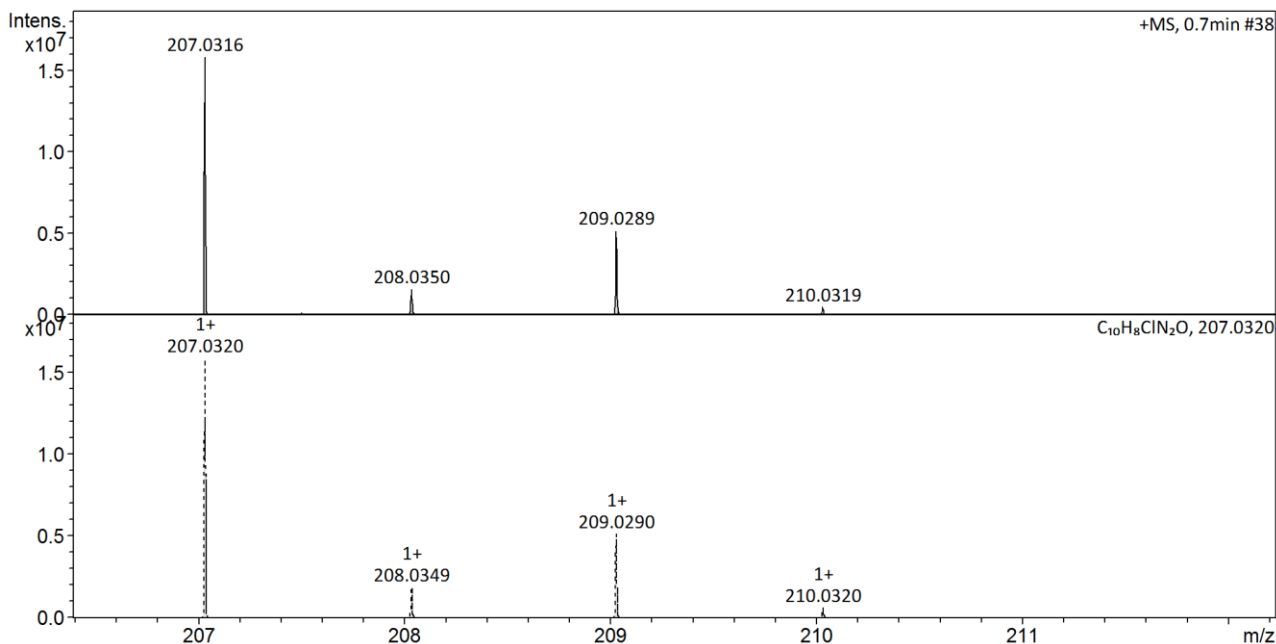

4-(4-chloro-1H-pyrazol-1-yl)benzotrile 1k

Display Report

Analysis Info

|               |                                                               |                  |                       |               |
|---------------|---------------------------------------------------------------|------------------|-----------------------|---------------|
| Analysis Name | D:\Data\nctu service\data\2022\20221127\JXC055_GB1_01_33253.d | Acquisition Date | 11/27/2022 3:28:28 PM |               |
| Method        | Small molecule.m                                              | Operator         | NCTU                  |               |
| Sample Name   | JXC055                                                        | Instrument       | impact HD             | 1819696.00164 |
| Comment       |                                                               |                  |                       |               |

Acquisition Parameter

|             |          |                      |          |                  |           |
|-------------|----------|----------------------|----------|------------------|-----------|
| Source Type | ESI      | Ion Polarity         | Positive | Set Nebulizer    | 1.0 Bar   |
| Focus       | Active   | Set Capillary        | 4500 V   | Set Dry Heater   | 200 °C    |
| Scan Begin  | 50 m/z   | Set End Plate Offset | -500 V   | Set Dry Gas      | 6.0 l/min |
| Scan End    | 1500 m/z | Set Charging Voltage | 2000 V   | Set Divert Valve | Waste     |
|             |          | Set Corona           | 0 nA     | Set APCI Heater  | 0 °C      |

| Meas. m/z | # | Ion Formula                                     | m/z      | err [ppm] | mSigma | # Sigma | Score  | rdb | e <sup>-</sup> Conf | N-Rule | Adduct |
|-----------|---|-------------------------------------------------|----------|-----------|--------|---------|--------|-----|---------------------|--------|--------|
| 204.0319  | 1 | C <sub>10</sub> H <sub>7</sub> ClN <sub>3</sub> | 204.0323 | 2.1       | 13.0   | 1       | 100.00 | 8.5 | even                | ok     | M+H    |

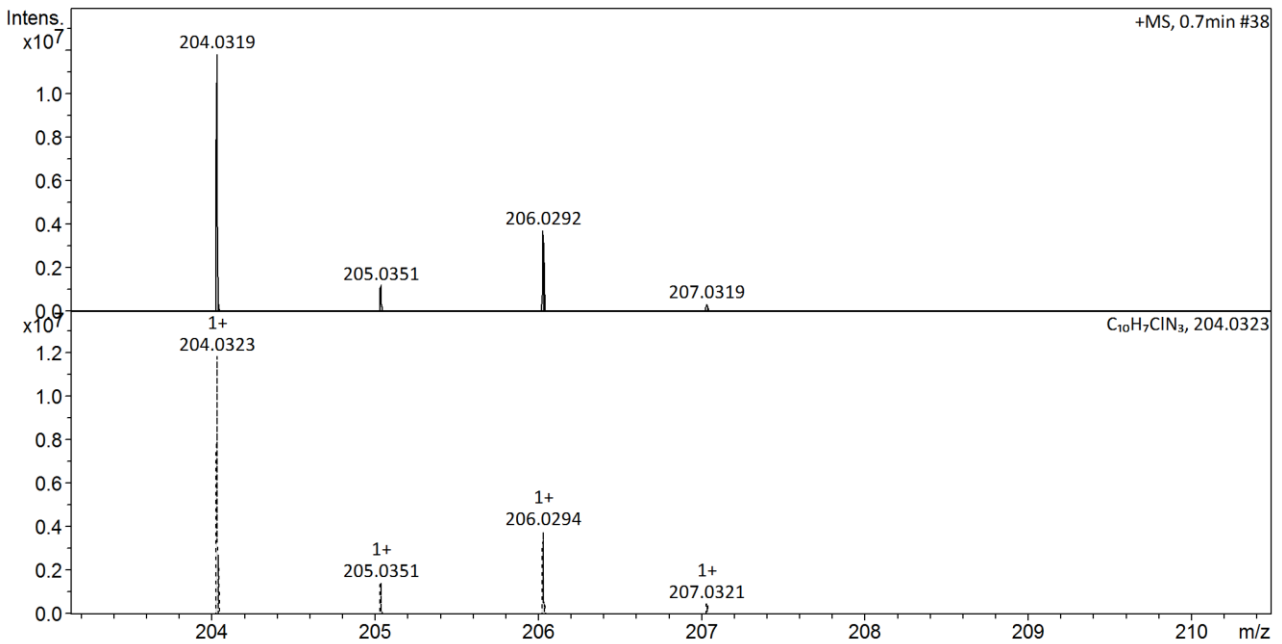

4-chloro-1-(4-nitrophenyl)-1H-pyrazole **11**

Display Report

Analysis Info

|               |                                                               |                  |                       |               |
|---------------|---------------------------------------------------------------|------------------|-----------------------|---------------|
| Analysis Name | D:\Data\nctu service\data\2022\20221127\JXC007_GB2_01_33254.d | Acquisition Date | 11/27/2022 3:32:51 PM |               |
| Method        | Small molecule.m                                              | Operator         | NCTU                  |               |
| Sample Name   | JXC007                                                        | Instrument       | impact HD             | 1819696.00164 |
| Comment       |                                                               |                  |                       |               |

Acquisition Parameter

|             |          |                      |          |                  |           |
|-------------|----------|----------------------|----------|------------------|-----------|
| Source Type | ESI      | Ion Polarity         | Positive | Set Nebulizer    | 1.0 Bar   |
| Focus       | Active   | Set Capillary        | 4500 V   | Set Dry Heater   | 200 °C    |
| Scan Begin  | 50 m/z   | Set End Plate Offset | -500 V   | Set Dry Gas      | 6.0 l/min |
| Scan End    | 1500 m/z | Set Charging Voltage | 2000 V   | Set Divert Valve | Waste     |
|             |          | Set Corona           | 0 nA     | Set APCI Heater  | 0 °C      |

| Meas. m/z | # | Ion Formula | m/z      | err [ppm] | mSigma | # Sigma | Score  | rdb | e <sup>-</sup> Conf | N-Rule | Adduct |
|-----------|---|-------------|----------|-----------|--------|---------|--------|-----|---------------------|--------|--------|
| 224.0220  | 1 | C9H7ClN3O2  | 224.0221 | -0.7      | 25.7   | 1       | 100.00 | 7.5 | even                | ok     | M+H    |

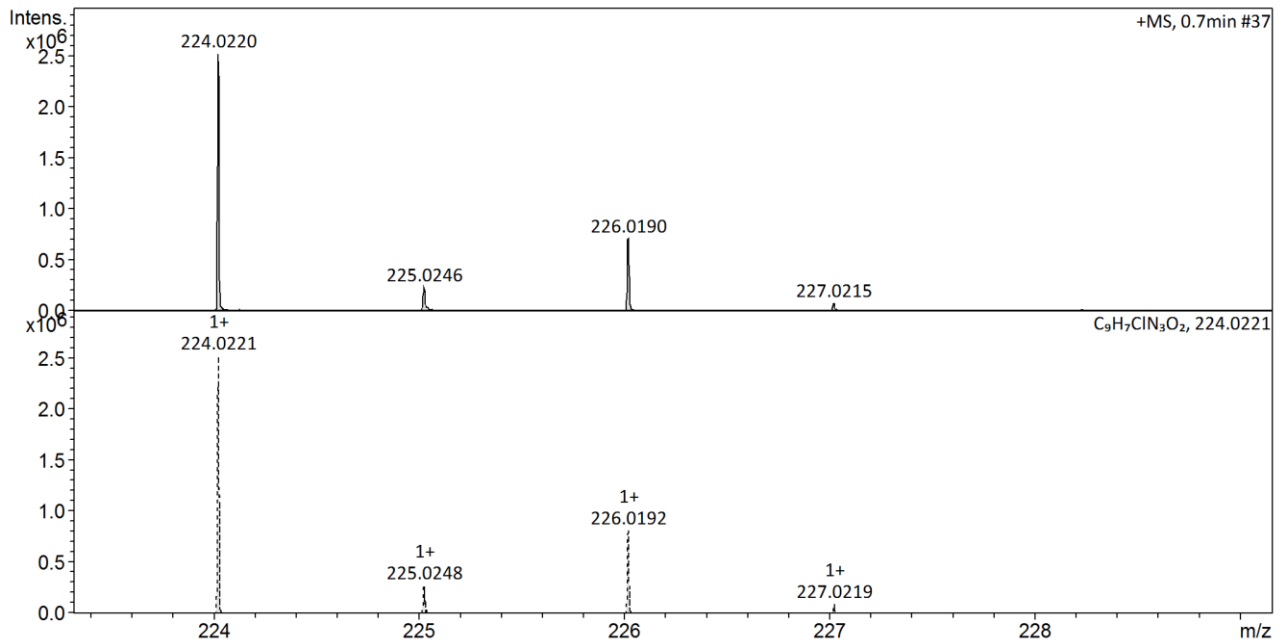

2-(4-chloro-1H-pyrazol-1-yl)pyridine 1m

## Display Report

**Analysis Info**

|               |                                                               |                  |                         |
|---------------|---------------------------------------------------------------|------------------|-------------------------|
| Analysis Name | D:\Data\nctu service\data\2022\20221127\CMC090_GB5_01_33257.d | Acquisition Date | 11/27/2022 3:45:53 PM   |
| Method        | Small molecule.m                                              | Operator         | NCTU                    |
| Sample Name   | CMC090                                                        | Instrument       | impact HD 1819696.00164 |
| Comment       |                                                               |                  |                         |

**Acquisition Parameter**

|             |          |                      |          |                  |           |
|-------------|----------|----------------------|----------|------------------|-----------|
| Source Type | ESI      | Ion Polarity         | Positive | Set Nebulizer    | 1.0 Bar   |
| Focus       | Active   | Set Capillary        | 4500 V   | Set Dry Heater   | 200 °C    |
| Scan Begin  | 50 m/z   | Set End Plate Offset | -500 V   | Set Dry Gas      | 6.0 l/min |
| Scan End    | 1500 m/z | Set Charging Voltage | 2000 V   | Set Divert Valve | Waste     |
|             |          | Set Corona           | 0 nA     | Set APCI Heater  | 0 °C      |

| Meas. m/z | # | Ion Formula                                    | m/z      | err [ppm] | mSigma | # Sigma | Score  | rdb | e <sup>-</sup> Conf | N-Rule | Adduct |
|-----------|---|------------------------------------------------|----------|-----------|--------|---------|--------|-----|---------------------|--------|--------|
| 180.0321  | 1 | C <sub>8</sub> H <sub>7</sub> ClN <sub>3</sub> | 180.0323 | -1.3      | 31.7   | 1       | 100.00 | 6.5 | even                | ok     | M+H    |

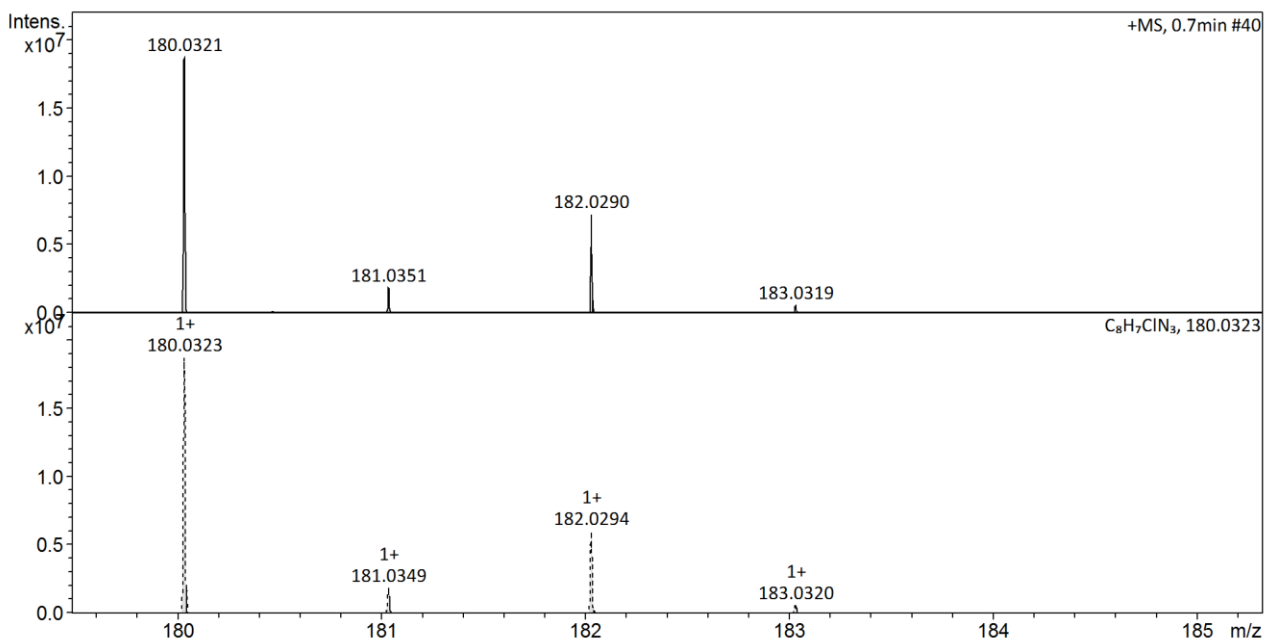

4-chloro-celecoxib **1n**

## Display Report

**Analysis Info**

|               |                                                               |                  |                         |
|---------------|---------------------------------------------------------------|------------------|-------------------------|
| Analysis Name | D:\Data\ntct service\data\2022\20220304\JXC039_GC2_01_28947.d | Acquisition Date | 3/4/2022 3:51:12 PM     |
| Method        | Small molecule.m                                              | Operator         | NCTU                    |
| Sample Name   | JXC039                                                        | Instrument       | impact HD 1819696.00164 |
| Comment       |                                                               |                  |                         |

**Acquisition Parameter**

|             |          |                      |          |                  |           |
|-------------|----------|----------------------|----------|------------------|-----------|
| Source Type | ESI      | Ion Polarity         | Positive | Set Nebulizer    | 1.0 Bar   |
| Focus       | Active   | Set Capillary        | 4500 V   | Set Dry Heater   | 200 °C    |
| Scan Begin  | 50 m/z   | Set End Plate Offset | -500 V   | Set Dry Gas      | 6.0 l/min |
| Scan End    | 1500 m/z | Set Charging Voltage | 2000 V   | Set Divert Valve | Waste     |
|             |          | Set Corona           | 0 nA     | Set APCI Heater  | 0 °C      |

| Meas. m/z | # | Ion Formula                                                                      | m/z      | err [ppm] | mSigma | # Sigma | Score  | rdb  | e <sup>-</sup> Conf | N-Rule | Adduct |
|-----------|---|----------------------------------------------------------------------------------|----------|-----------|--------|---------|--------|------|---------------------|--------|--------|
| 416.0440  | 1 | C <sub>17</sub> H <sub>14</sub> ClF <sub>3</sub> N <sub>3</sub> O <sub>2</sub> S | 416.0442 | -0.5      | 26.4   | 1       | 100.00 | 10.5 | even                | ok     | M+H    |

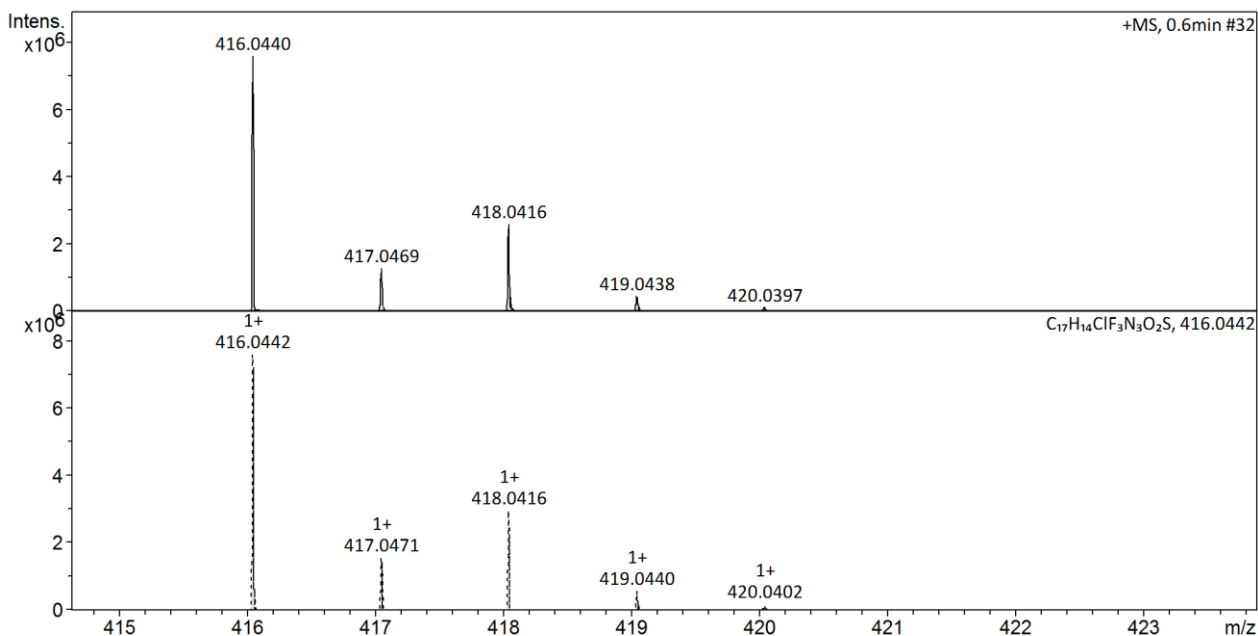

## Reference

1. Z.-G. Zhao and Z.-X. Wang, *Synth. Commun.*, 2007, **37**, 137-147.
2. S. Safaei, I. M.-Baltork, A. R. Khosropour, M. Moghadam, S. Tangestaninejad, V. Mirkhani and R. Kia, *RSC Adv.*, 2012, **2**, 5610-5616.
3. M. L. Jawor, B. M. Ahmed and G. Mezei, *Green Chem.*, 2016, **18**, 6209-6214.
4. K. L. Olsen, M. R. Jensen and J. A. MacKay, *Tetrahedron Lett.*, 2017, **58**, 4111-4114.
5. L. Zhang, L. Liardet, J. Luo, D. Ren, M. Grätzel and X. Hu, *Nat. Catal.*, 2019, **2**, 366-373.
6. R. E. Beveridge, D. Fernando and B. S. Gerstenberger, *Tetrahedron Lett.*, 2010, **51**, 5005-5008.
7. V.T. Klimko, *Russ. J. Gen. Chem.*, 1961, **31**, 170-5.
8. M. A. Khan and A. A. A. Pinto, *J. Heterocyclic Chem.*, 1981, **18**, 9-14.
9. V. M. Muzalevskiy and V. G. Nenajdenko, *Org. Biomol. Chem.*, 2018, **16**, 7935-7946.
10. C. Hansch, A. Leo and R. W. Taft, *Chem. Rev.*, 1991, **91**, 165-195
11. M. Wang, Y. Zhang, T. Wang, C. Wang, D. Xue and J. Xiao, *Org. Lett.*, 2016, **18**, 1976-1979.
12. R. A. Rodriguez, C.-M. Pan, Y. Yabe, Y. Kawamata, M. D. Eastgate and P. S. Baran, *J. Am. Chem. Soc.*, 2014, **136**, 6908-6911.
13. Z. Lu, Q. Li, M. Tang, P. Jiang, H. Zheng and X. Yang, *Chem. Commun.*, 2015, **51**, 14852-14855.
14. D. A. Rogers, A. T. Bensalah, A. T. Espinosa, J. L. Hoerr, F. H. Refai, A. K. Pitzel, J. J. Alvarado and A. A. Lamar, *Org. Lett.*, 2019, **21**, 4229-4233
15. K. L. Olsen, M. R. Jensen and J. A. MacKay, *Tetrahedron Lett.*, 2017, **58**, 4111-4114.
